# Supplementary material for: Visible-light-mediated reaction: synthesis of quinazolinones from 1,2-dihydroquinazoline 3-oxides
Source: Royal Society of Chemistry journal article supplement (doi:10.1039/c6ra13972h), 2016-01-01

## Supporting Information

### Visible-Light-Mediated Reaction: Synthesis of Quinazolinones from 1,2-Dihydroquinazoline 3-Oxides

Chun-Ku Wu and Ding-Yah Yang\*

*Department of Chemistry, Tunghai University,*

*No. 1727, Sec. 4, Taiwan Boulevard, Xitun District, Taichung City 40704,*

*Taiwan, Republic of China*

\*Corresponding author Tel: 886-4-2359-0121; fax: 886-4-2359-0426;

e-Mail: yang@thu.edu.tw

### Table of Contents

|                                                                                           |         |
|-------------------------------------------------------------------------------------------|---------|
| 1. Copy of $^1\text{H}$ NMR spectra of compound <b>5</b> .....                            | S2      |
| 2. Copy of $^1\text{H}$ NMR spectra of compound <b>6</b> .....                            | S3      |
| 3. Copies of $^1\text{H}$ and $^{13}\text{C}$ NMR spectra of compounds <b>3a–e</b> .....  | S4-S13  |
| 4. Copies of $^1\text{H}$ and $^{13}\text{C}$ NMR spectra of compounds <b>7a–g</b> .....  | S14-S27 |
| 5. Copy of $^1\text{H}$ NMR spectra of compound <b>18</b> .....                           | S28     |
| 6. Copy of $^1\text{H}$ NMR spectra of compound <b>19</b> .....                           | S29     |
| 7. Copy of $^1\text{H}$ NMR spectra of compound <b>20</b> .....                           | S30     |
| 8. Copies of $^1\text{H}$ and $^{13}\text{C}$ NMR spectra of compounds <b>16a–g</b> ..... | S31-S43 |
| 9. Copies of $^1\text{H}$ and $^{13}\text{C}$ NMR spectra of compound <b>21</b> .....     | S44-S45 |

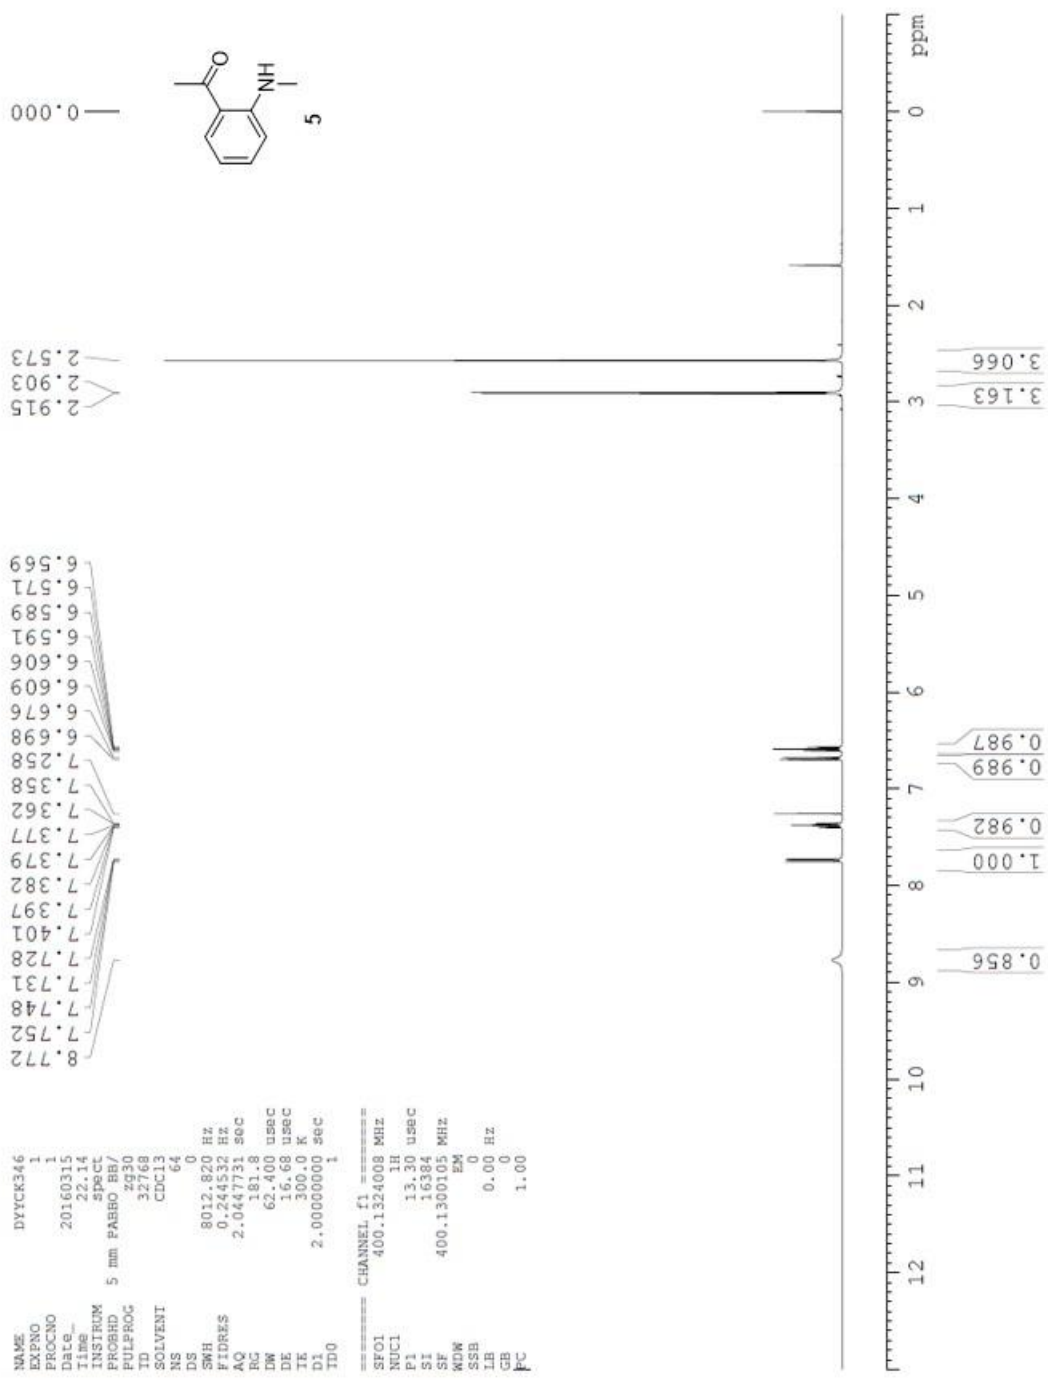

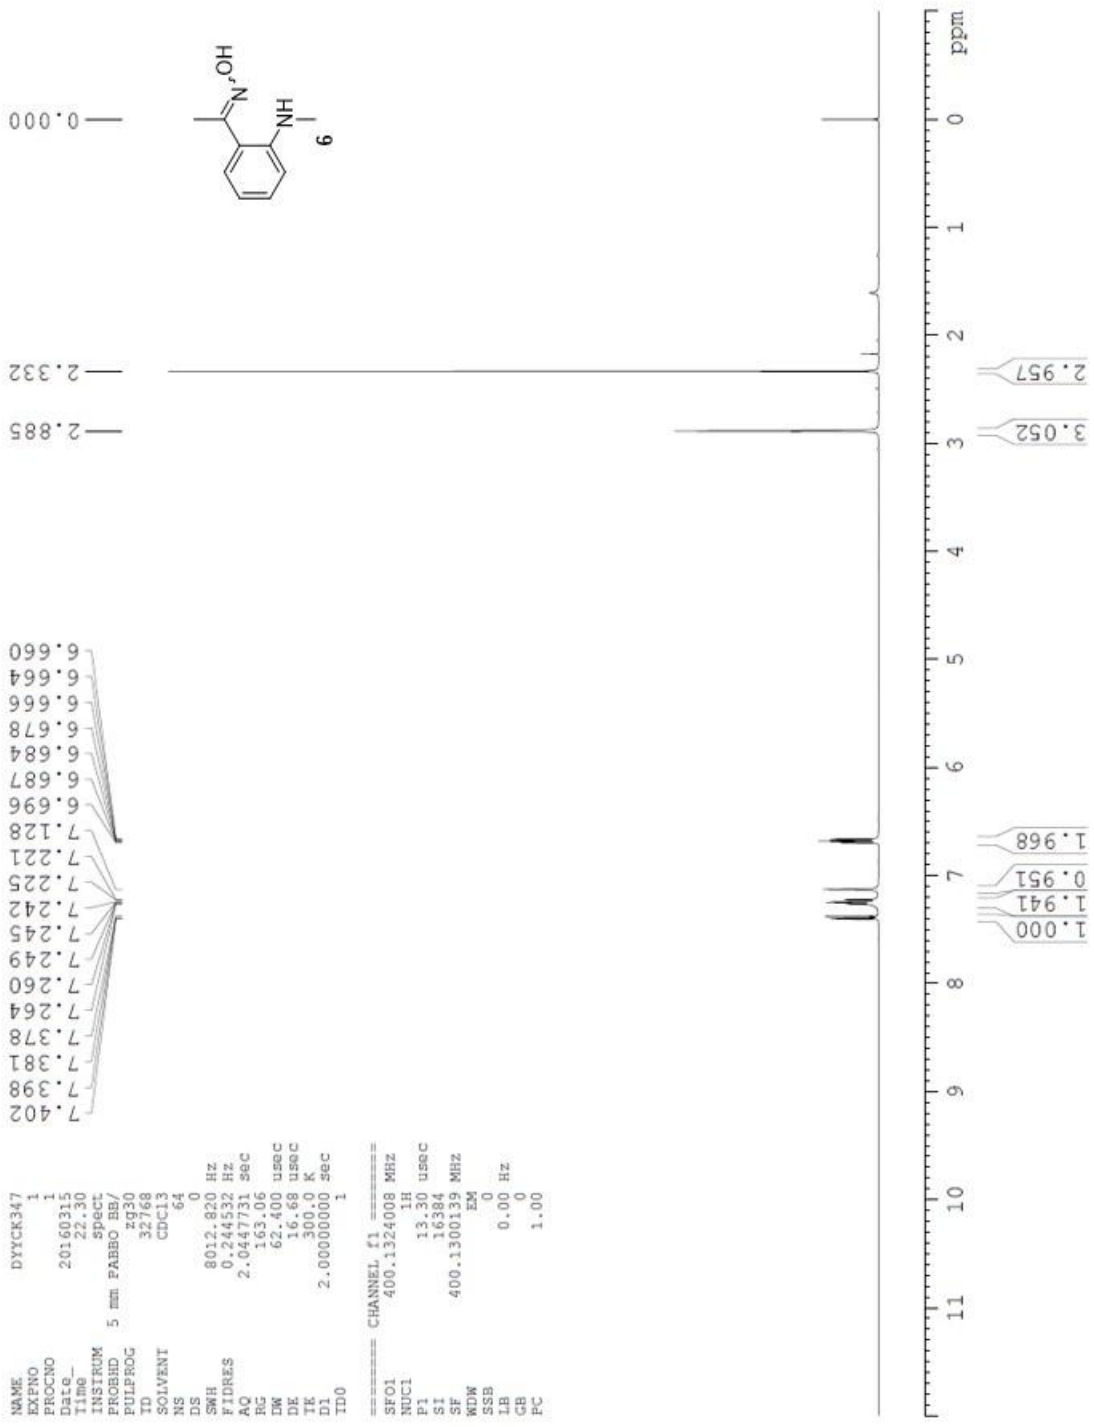

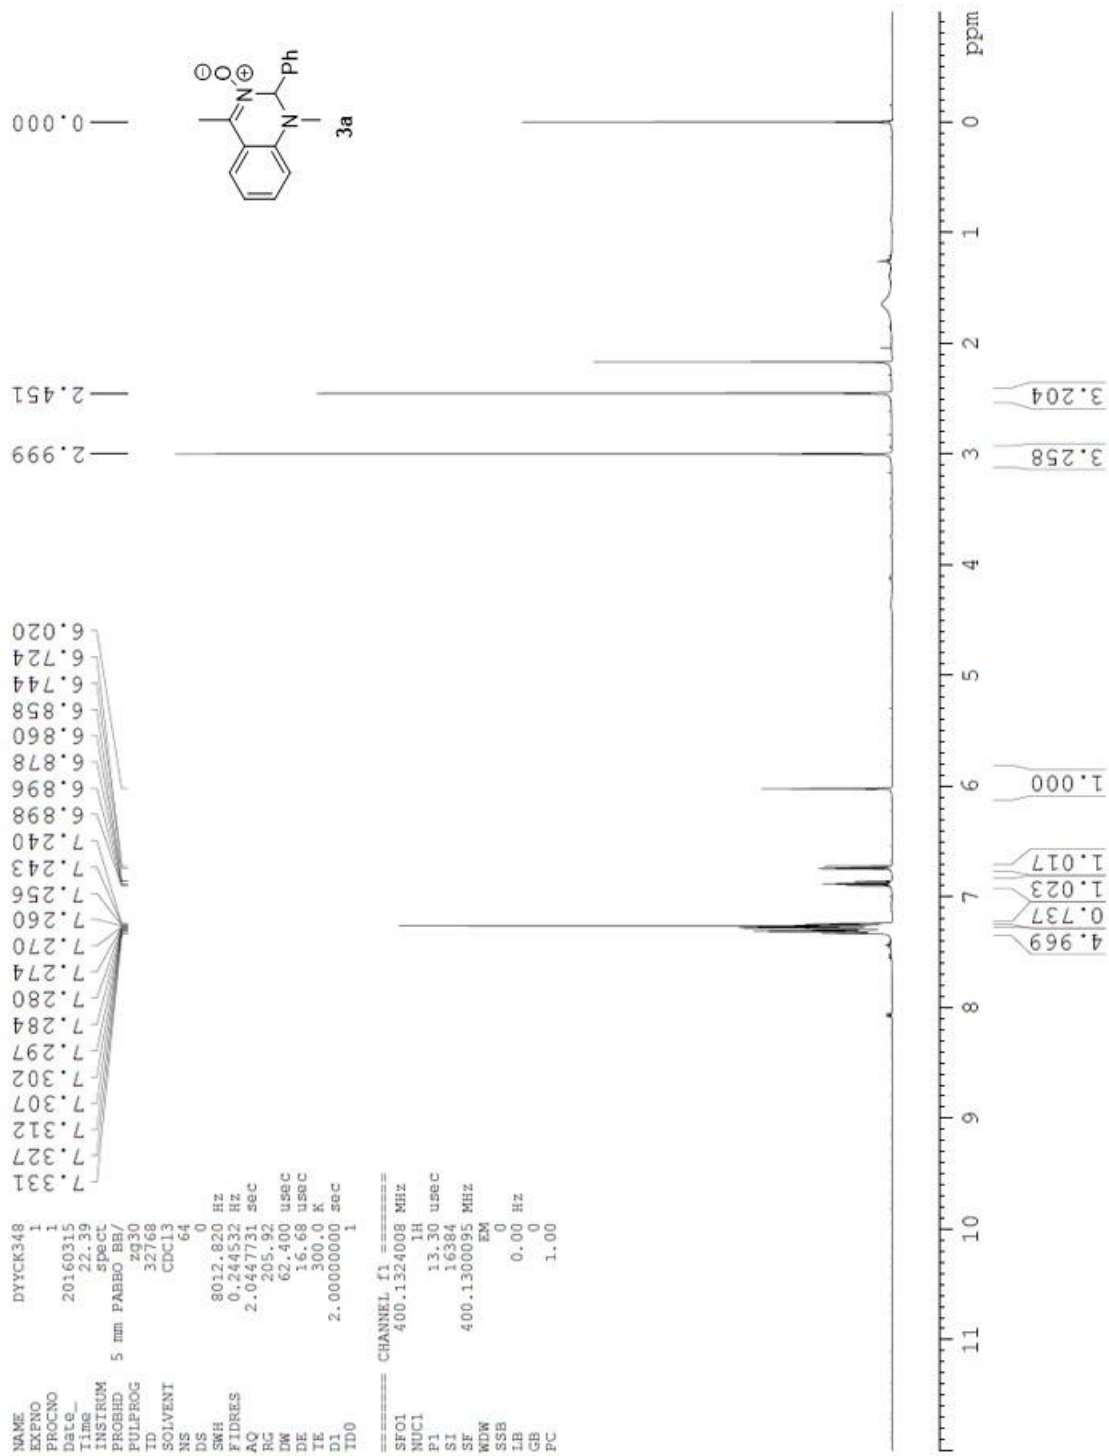

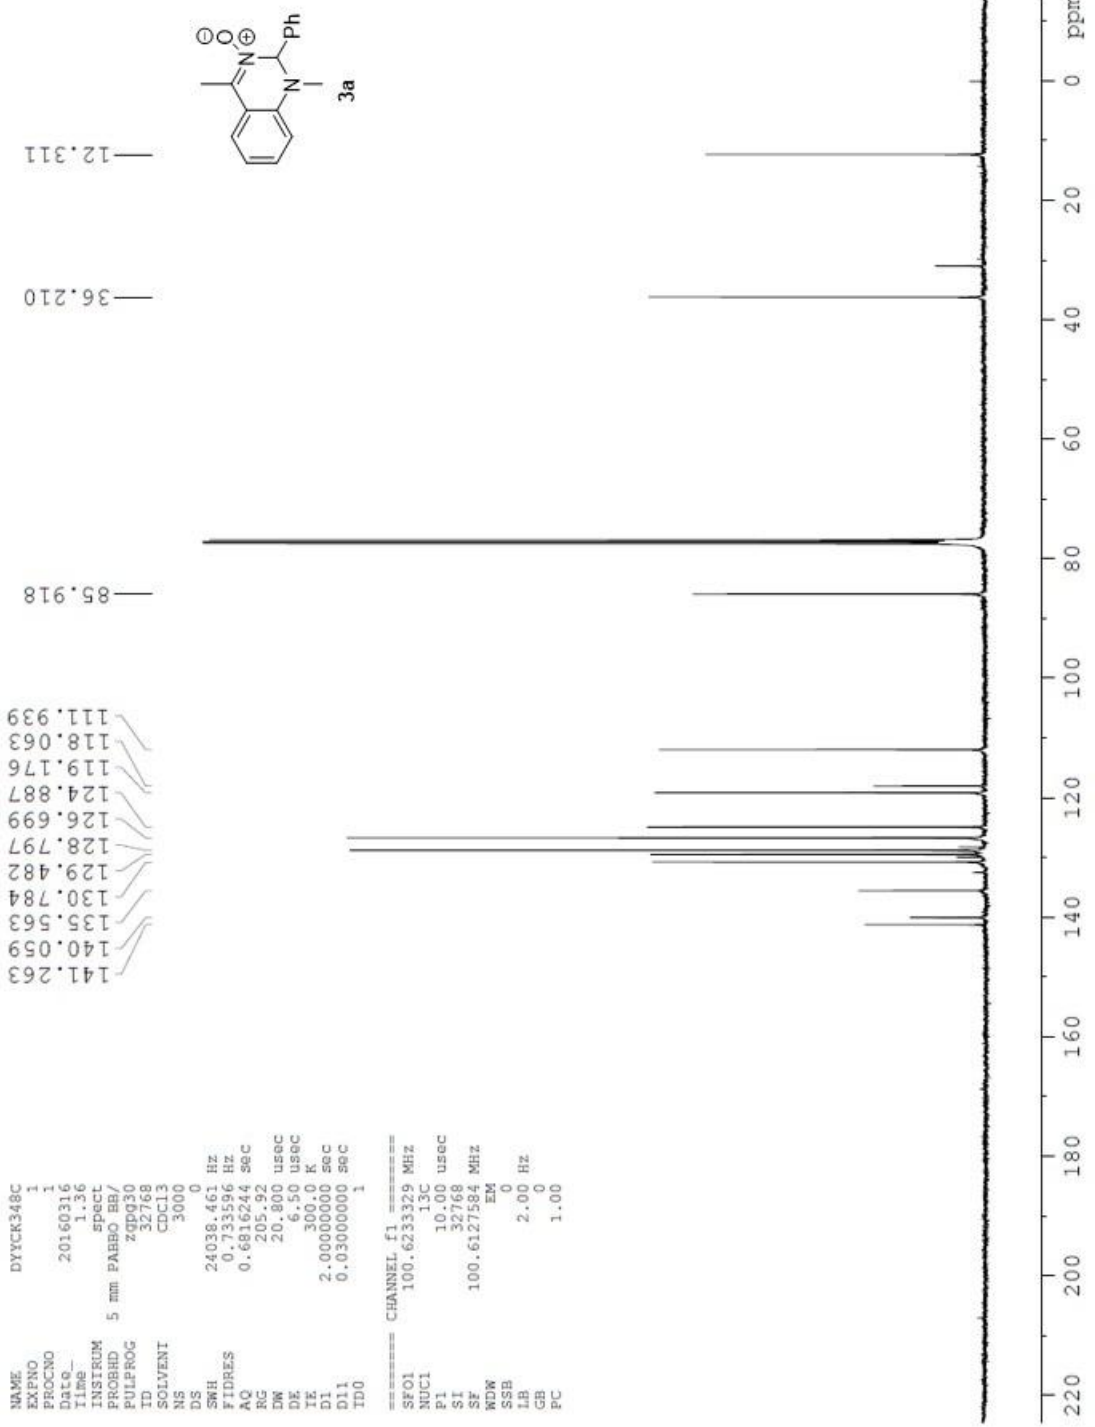

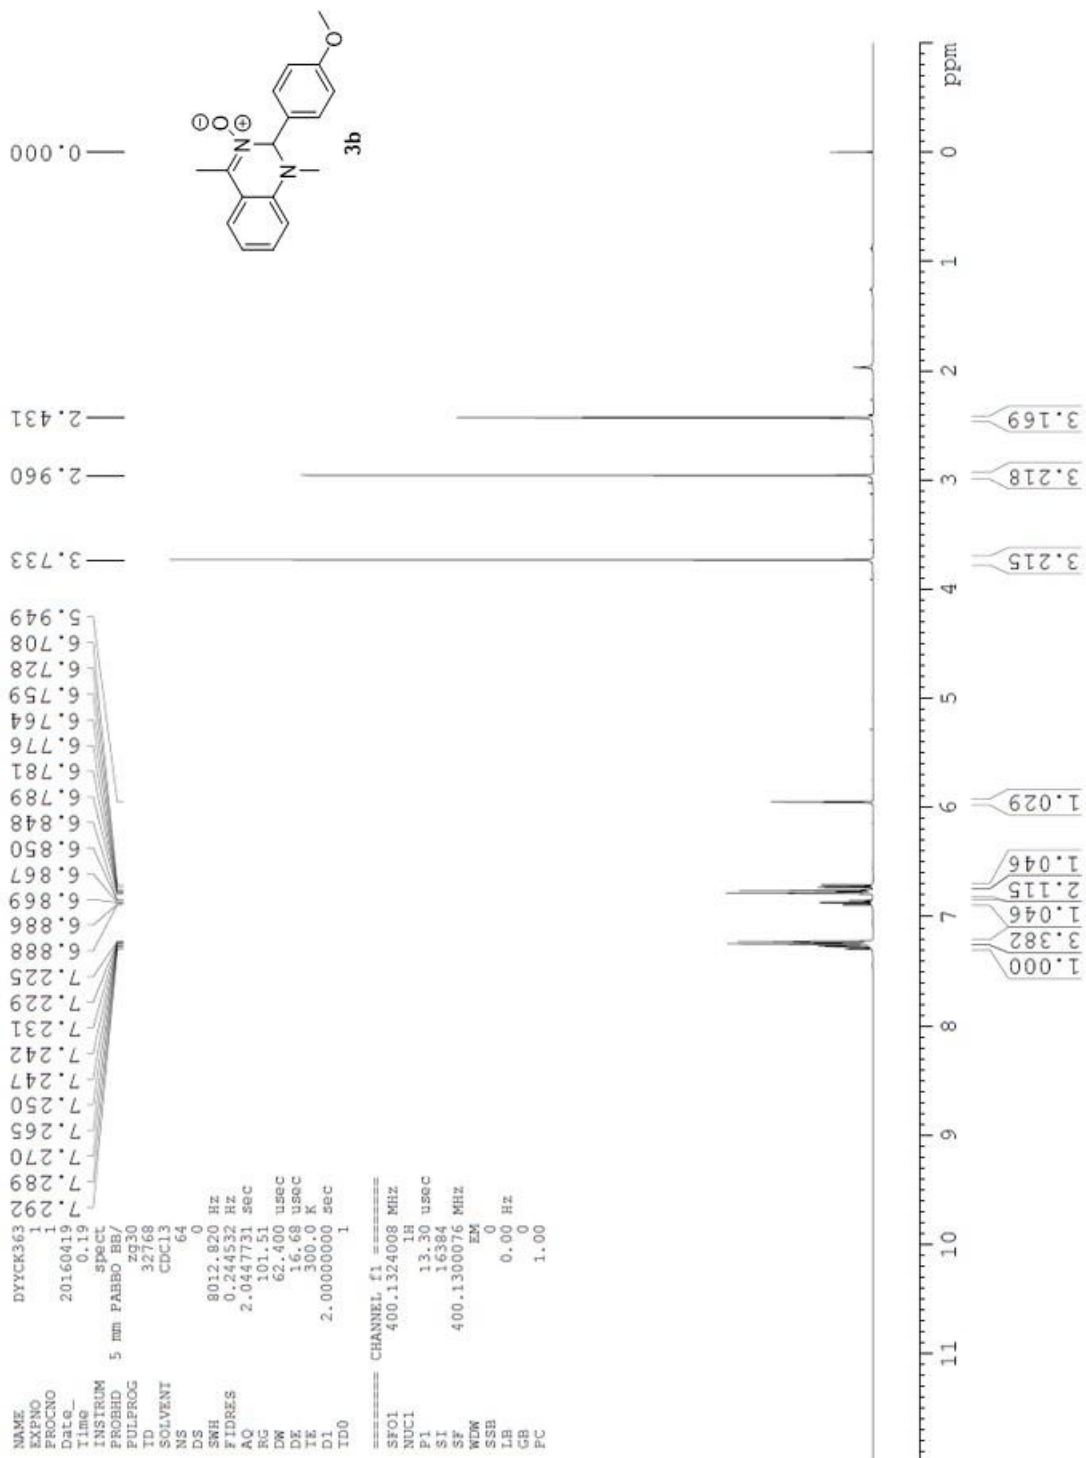

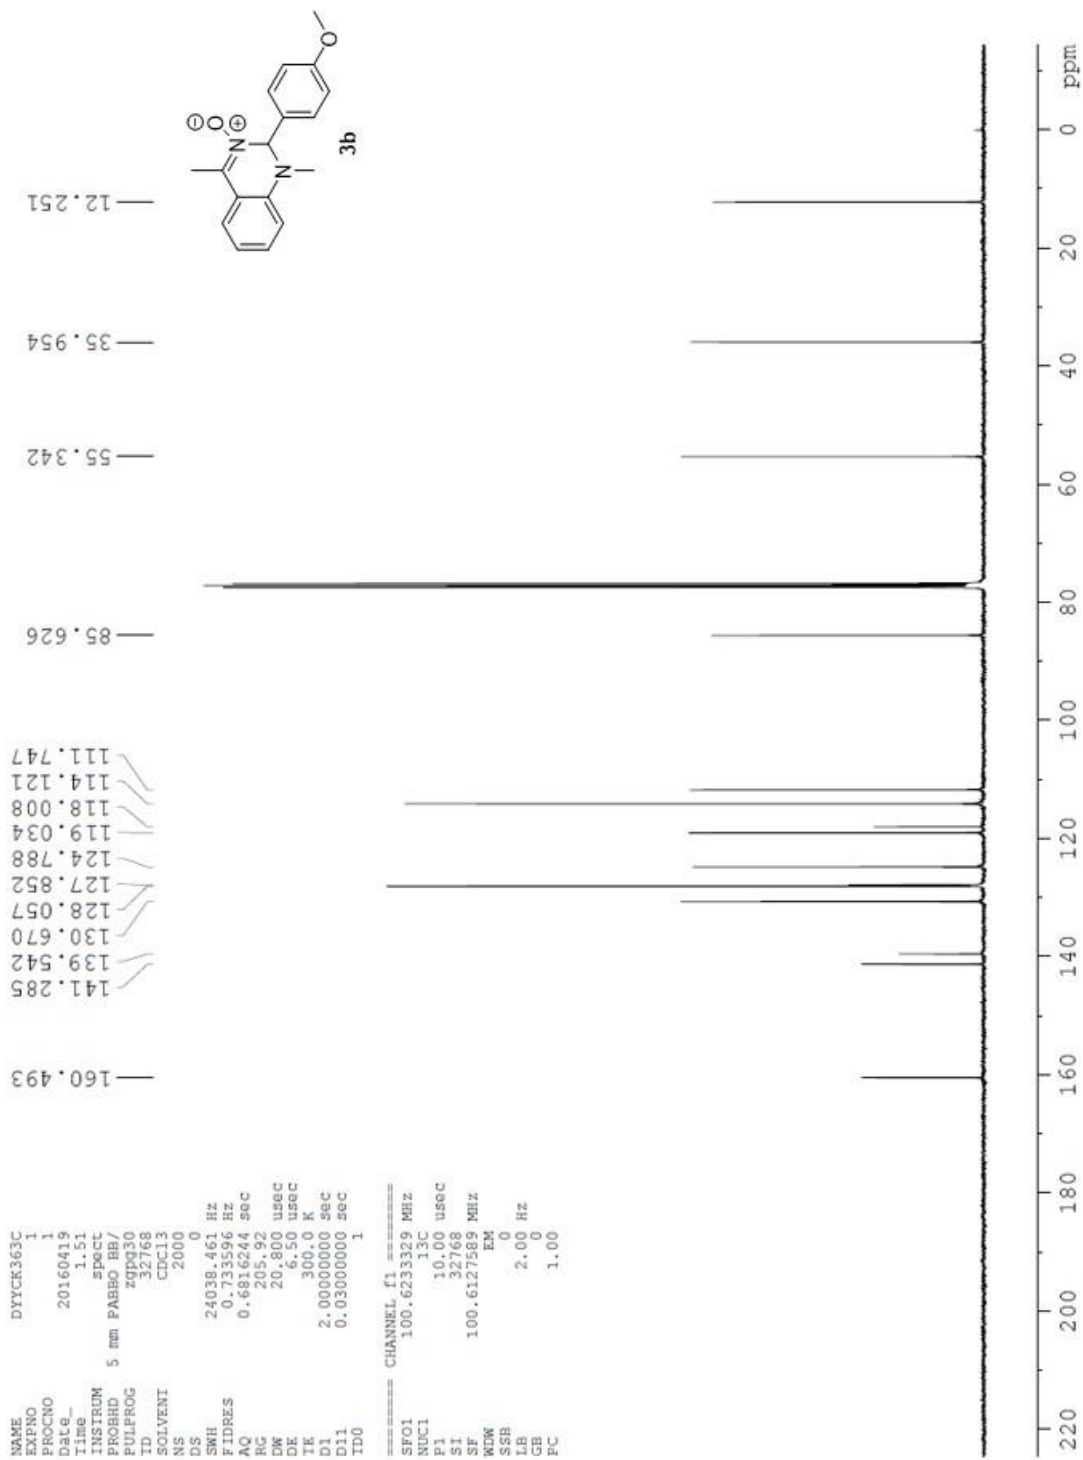

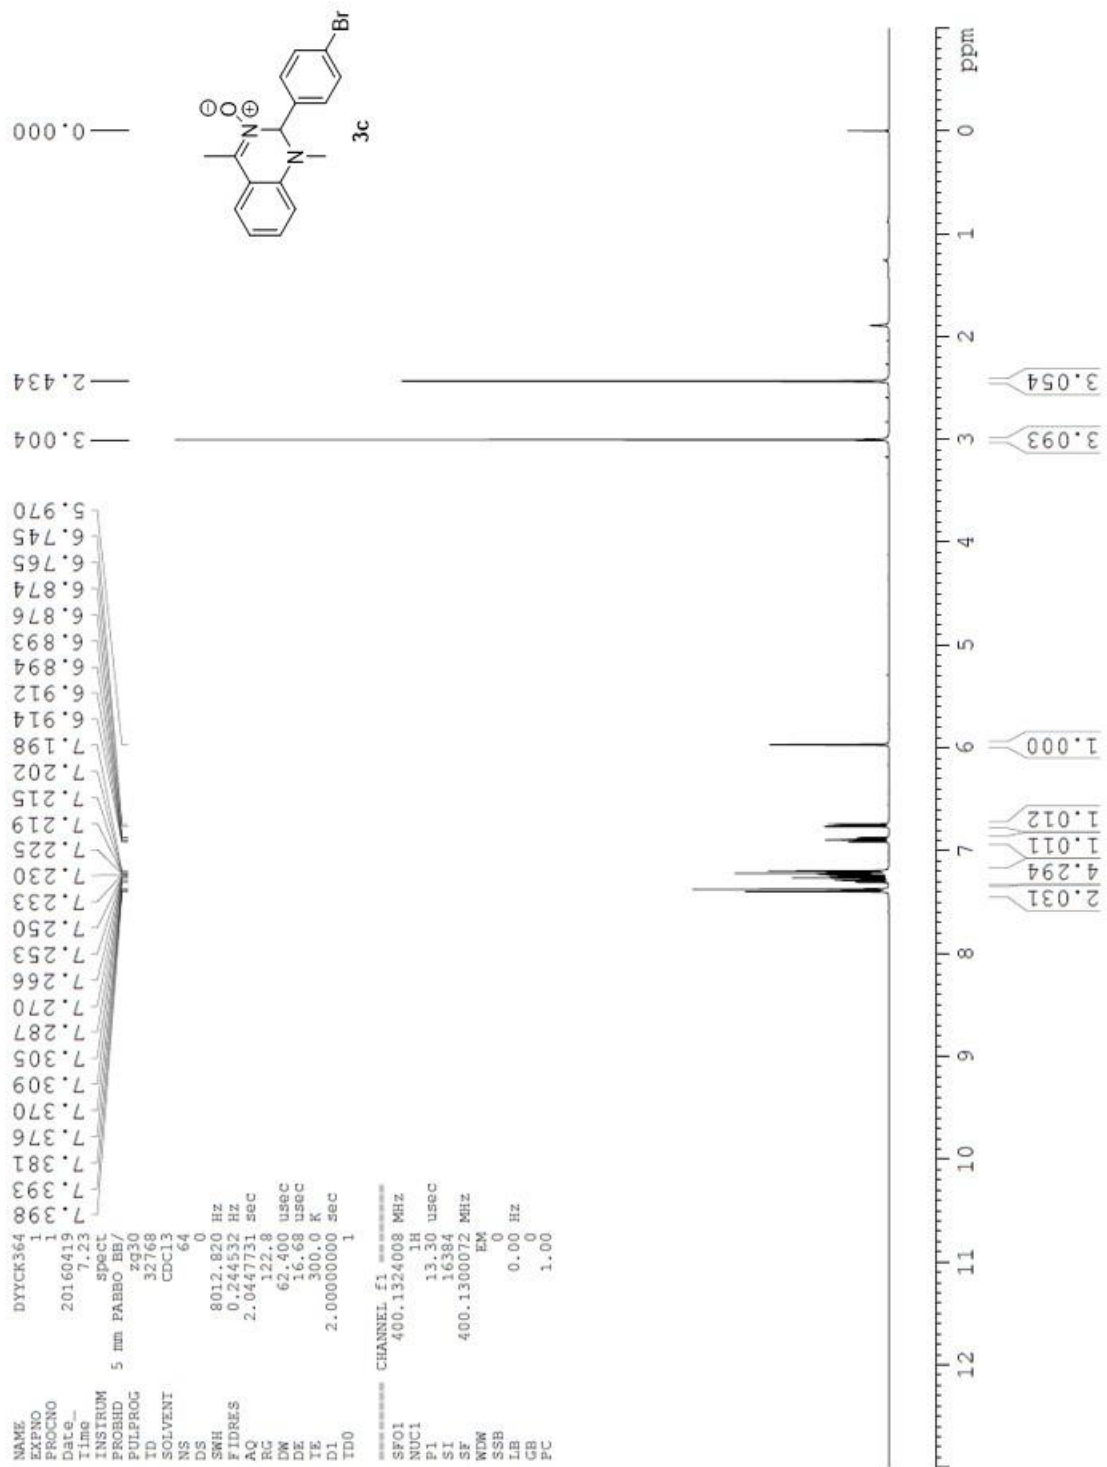



```

NAME          DYYCK364C
EXPNO         1
PROCNO        1
Date_         20160419
Time          8.56
INSTRUM       spect
PROBHD        5 mm PABBO BB/
PULPROG       zgpg30
TD            32768
SOLVENT       CDCl3
NS            2000
DS            0
SKH           24038.461 Hz
FIDRES        0.733596 Hz
AQ            0.6816244 sec
RG            205.82
DW            20.800 usec
DE            6.50 usec
TE            300.0 K
D1            2.00000000 sec
D11           0.03000000 sec
TD0           1

===== CHANNEL f1 =====
SFO1          100.6233329 MHz
NUC1          13C
P1            10.00 usec
SI            32768
SF            100.6127580 MHz
WDW           EM
SSB           0
LB            2.00 Hz
GB            0
PC            1.00

```

```

140.916
139.923
134.625
131.963
130.855
128.402
124.920
123.685
119.581
118.101
112.281

```

```

85.382
36.509
12.307

```

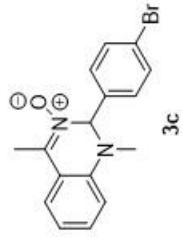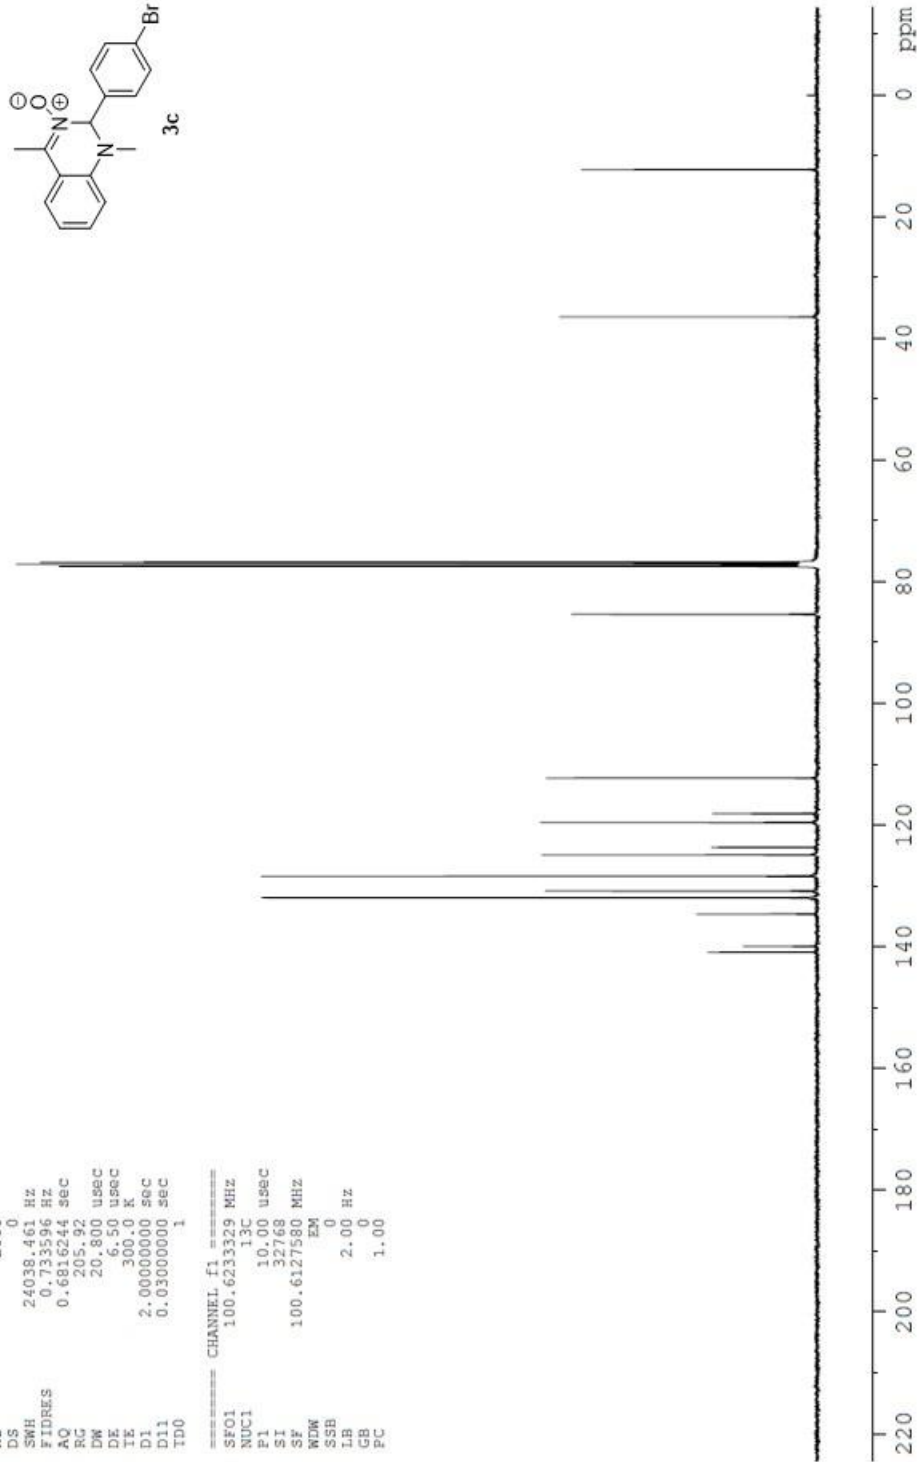

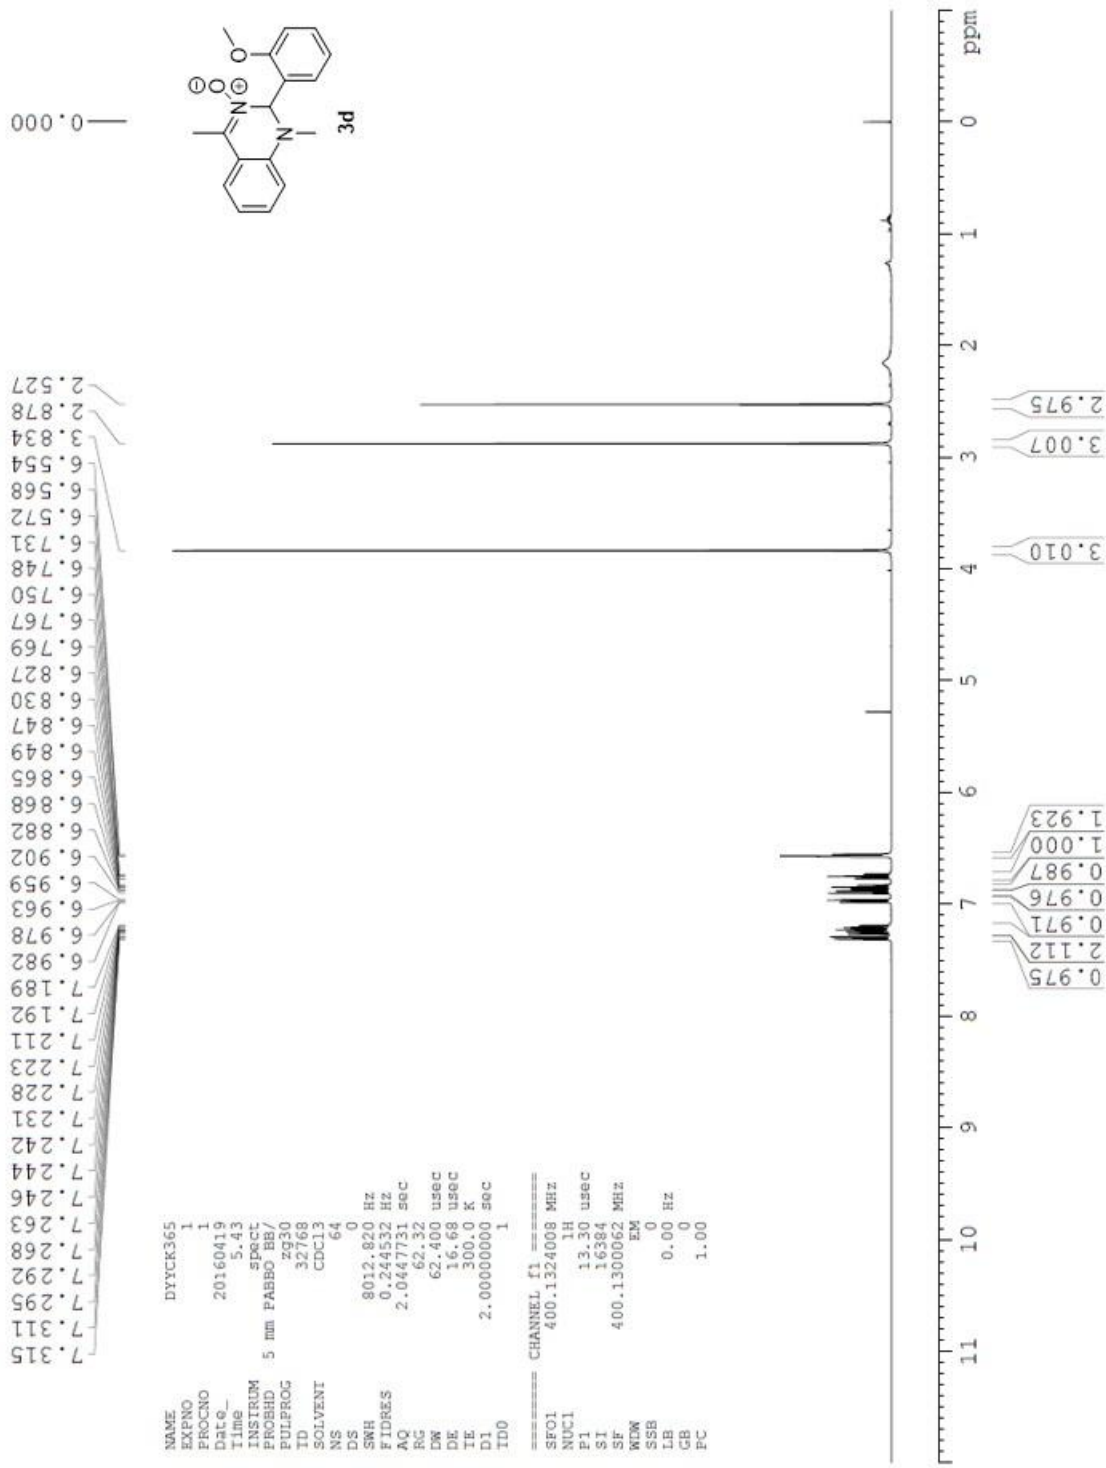

```

NAME          DYYCK365C
EXPNO         1
PROCNO        1
Date_         20160419
Time         7.15
INSTRUM       spect
PROBHD        5 mm PABBO BB/
PULPROG       zgpg30
ID            52768
SOLVENT       CDCl3
NS            2000
DS            0
SWH           24038.461 Hz
FIDRES        0.733536 Hz
AQ            0.6816244 sec
RG            205.92
DW            20.800 usec
DE            6.50 usec
TE            300.0 K
D1            2.00000000 sec
D11           0.03000000 sec
TD0           1
===== CHANNEL f1 =====
SFO1          100.623329 MHz
NUC1          13C
P1            10.00 usec
SI            32768
SF            100.6127626 MHz
WDW           EM
SSB           0
LB            2.00 Hz
GB            0
PC            1.00

```

```

156.959
141.693
141.012
130.665
130.642
126.718
124.408
124.146
120.992
118.635
118.203
111.942
111.262

```

```

79.282
55.807
35.253
12.139

```

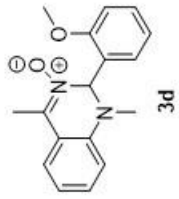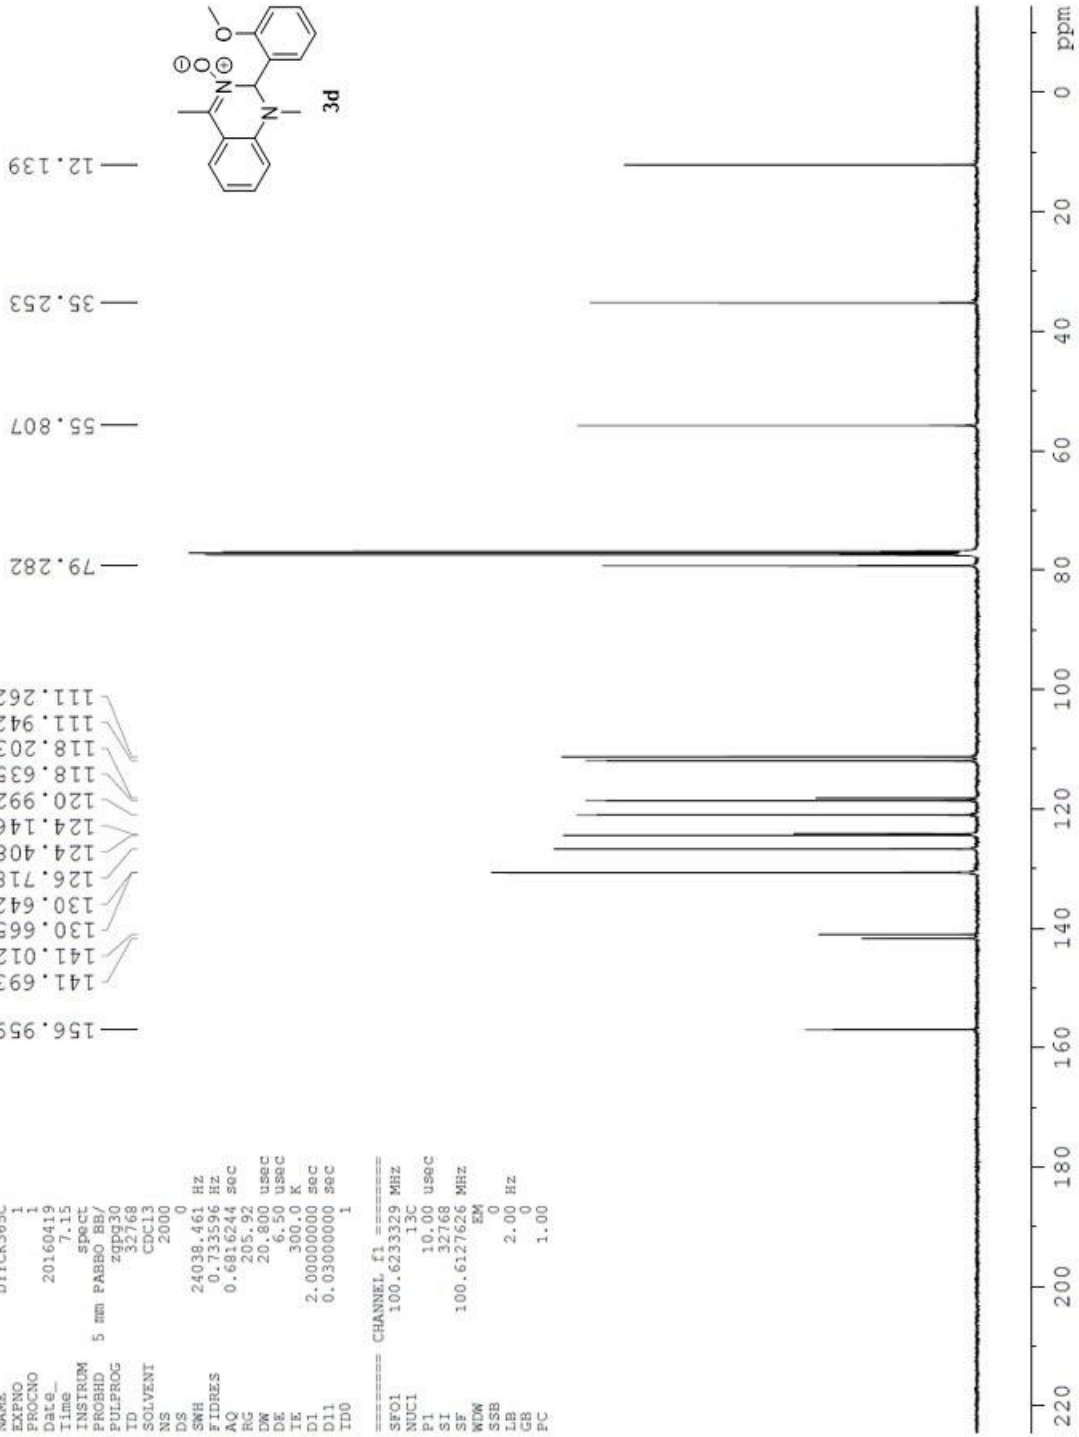

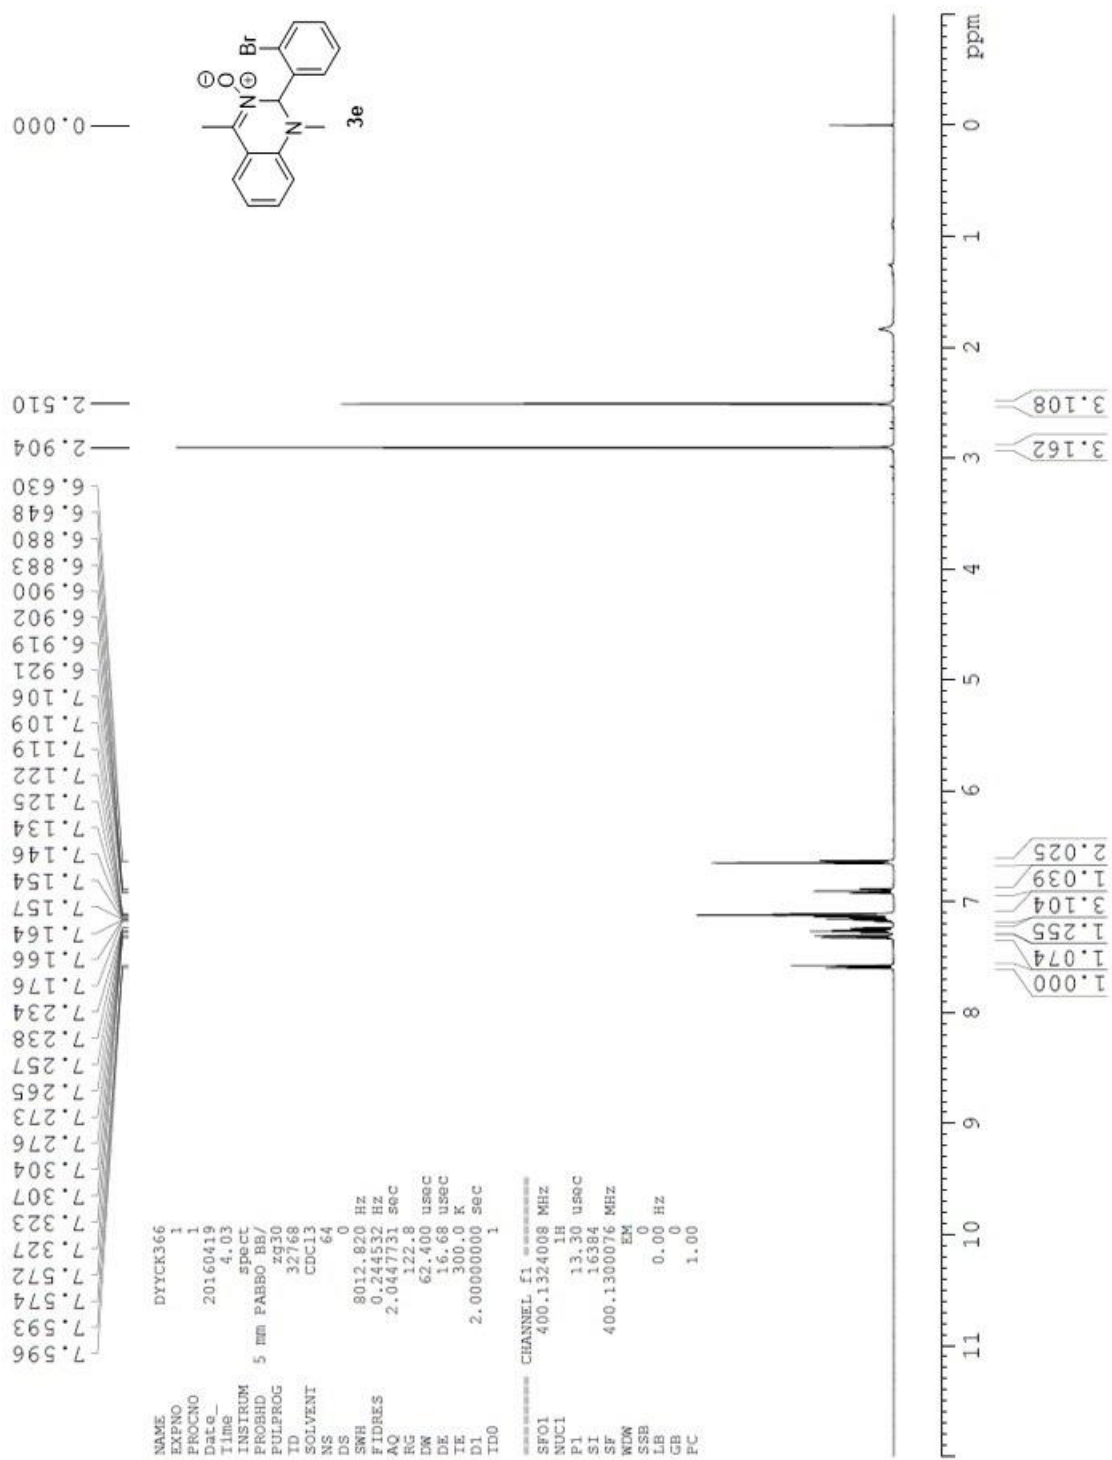

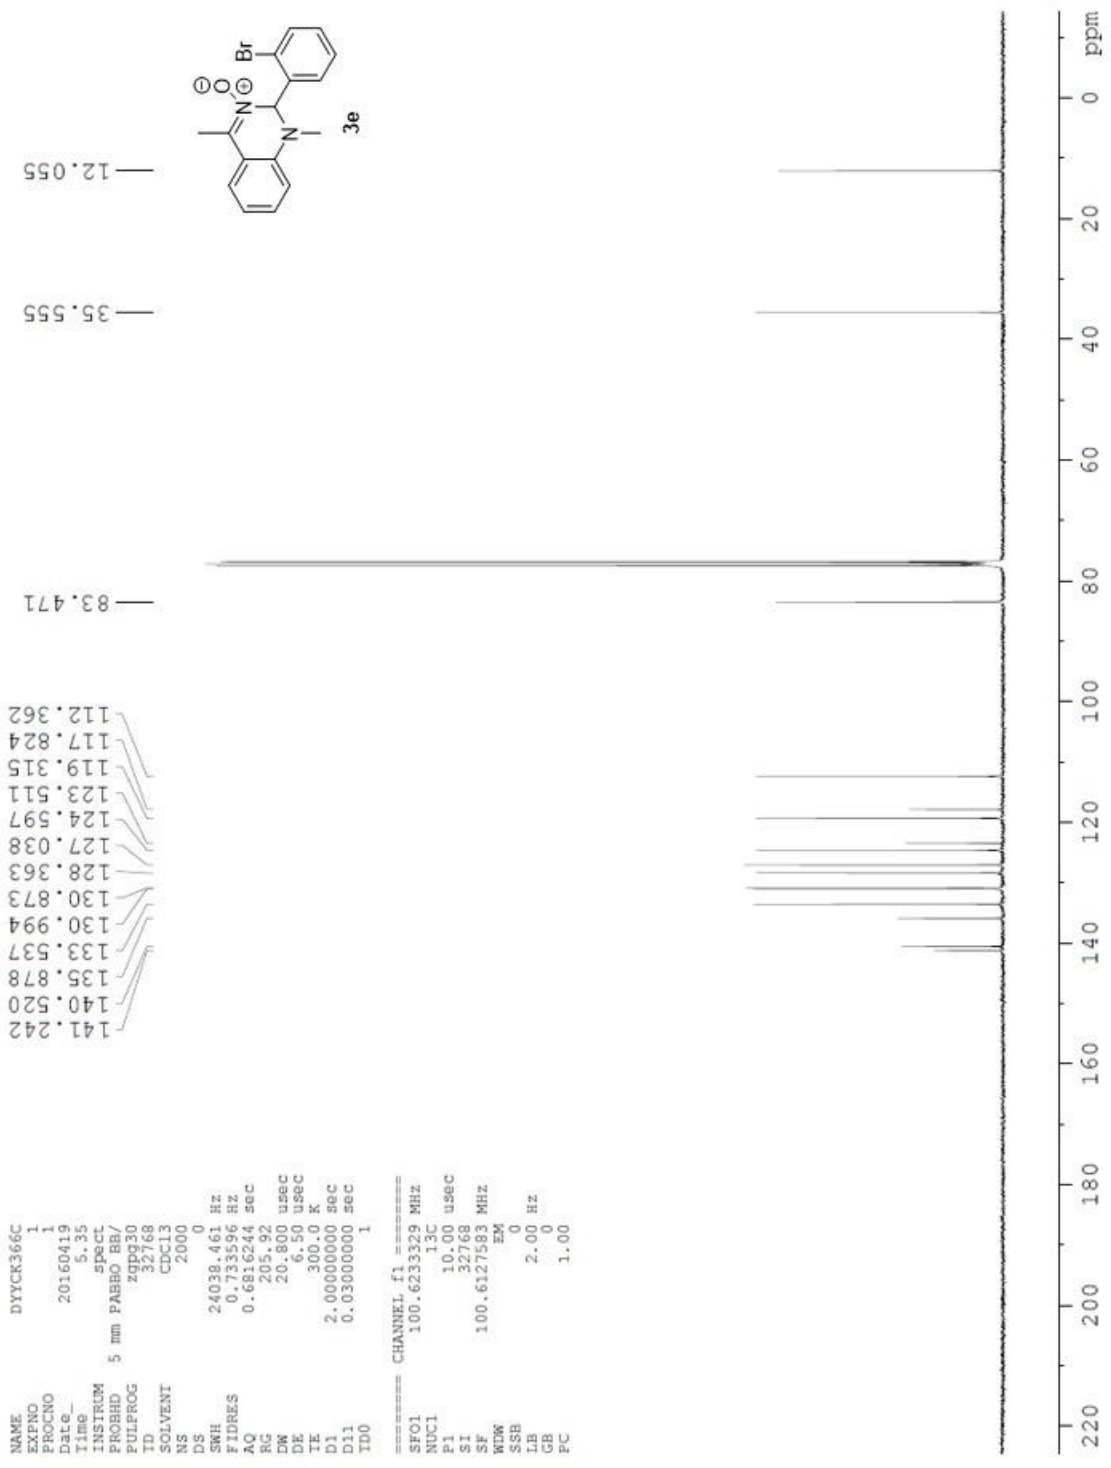

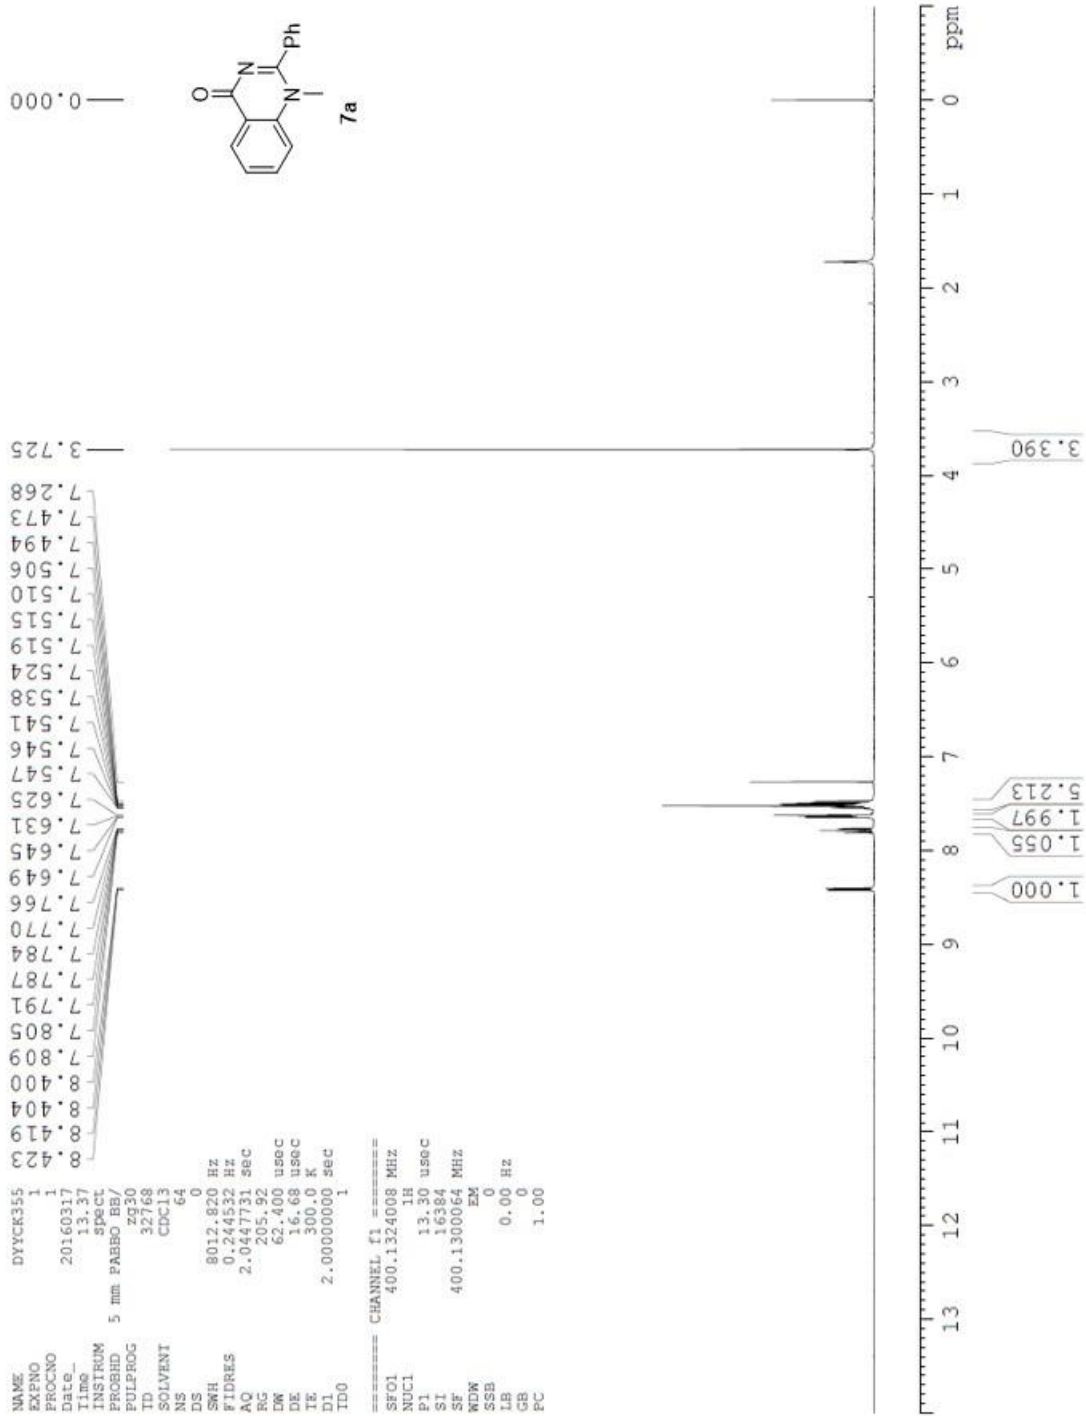

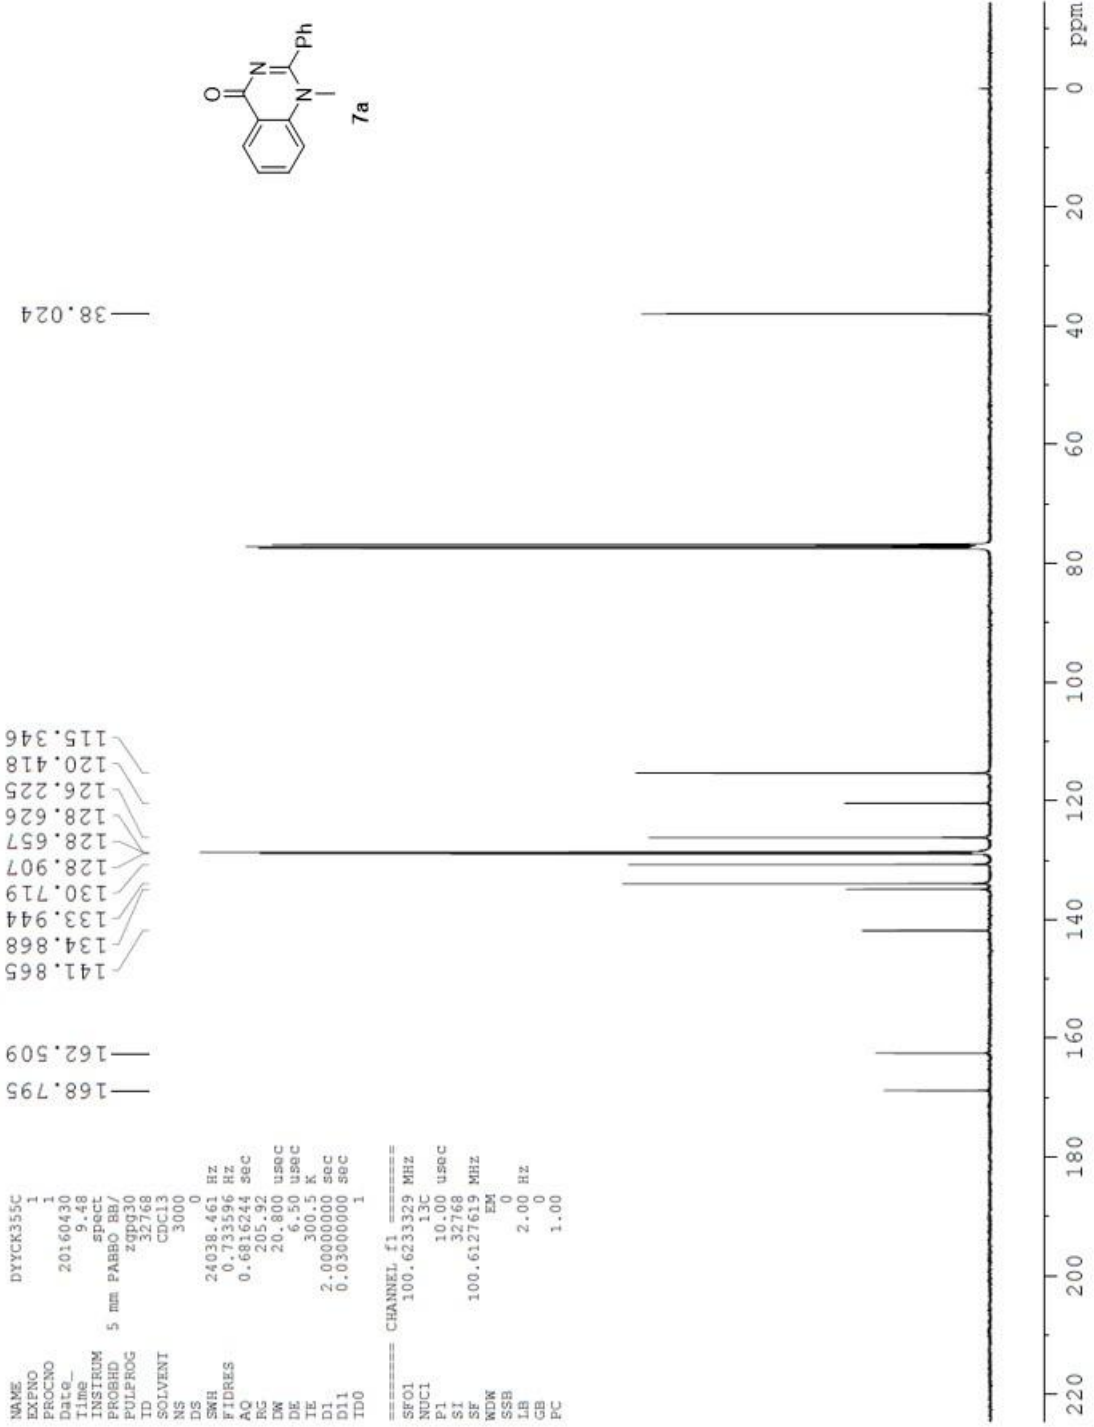

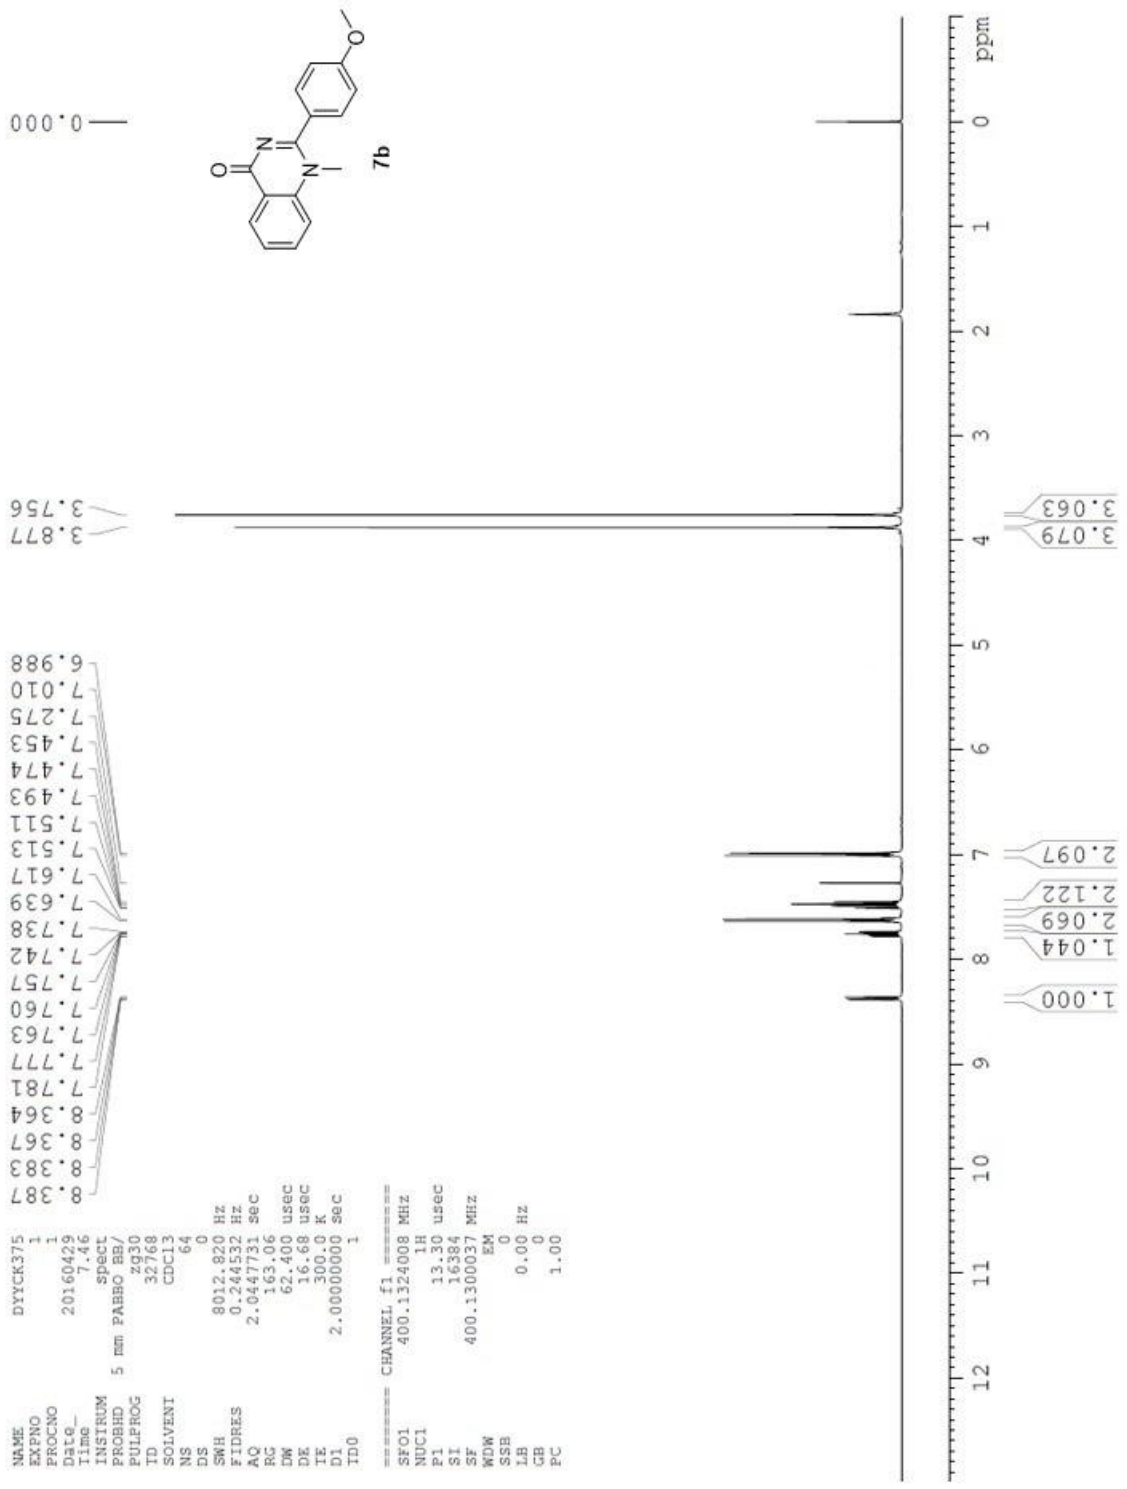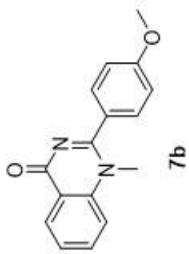



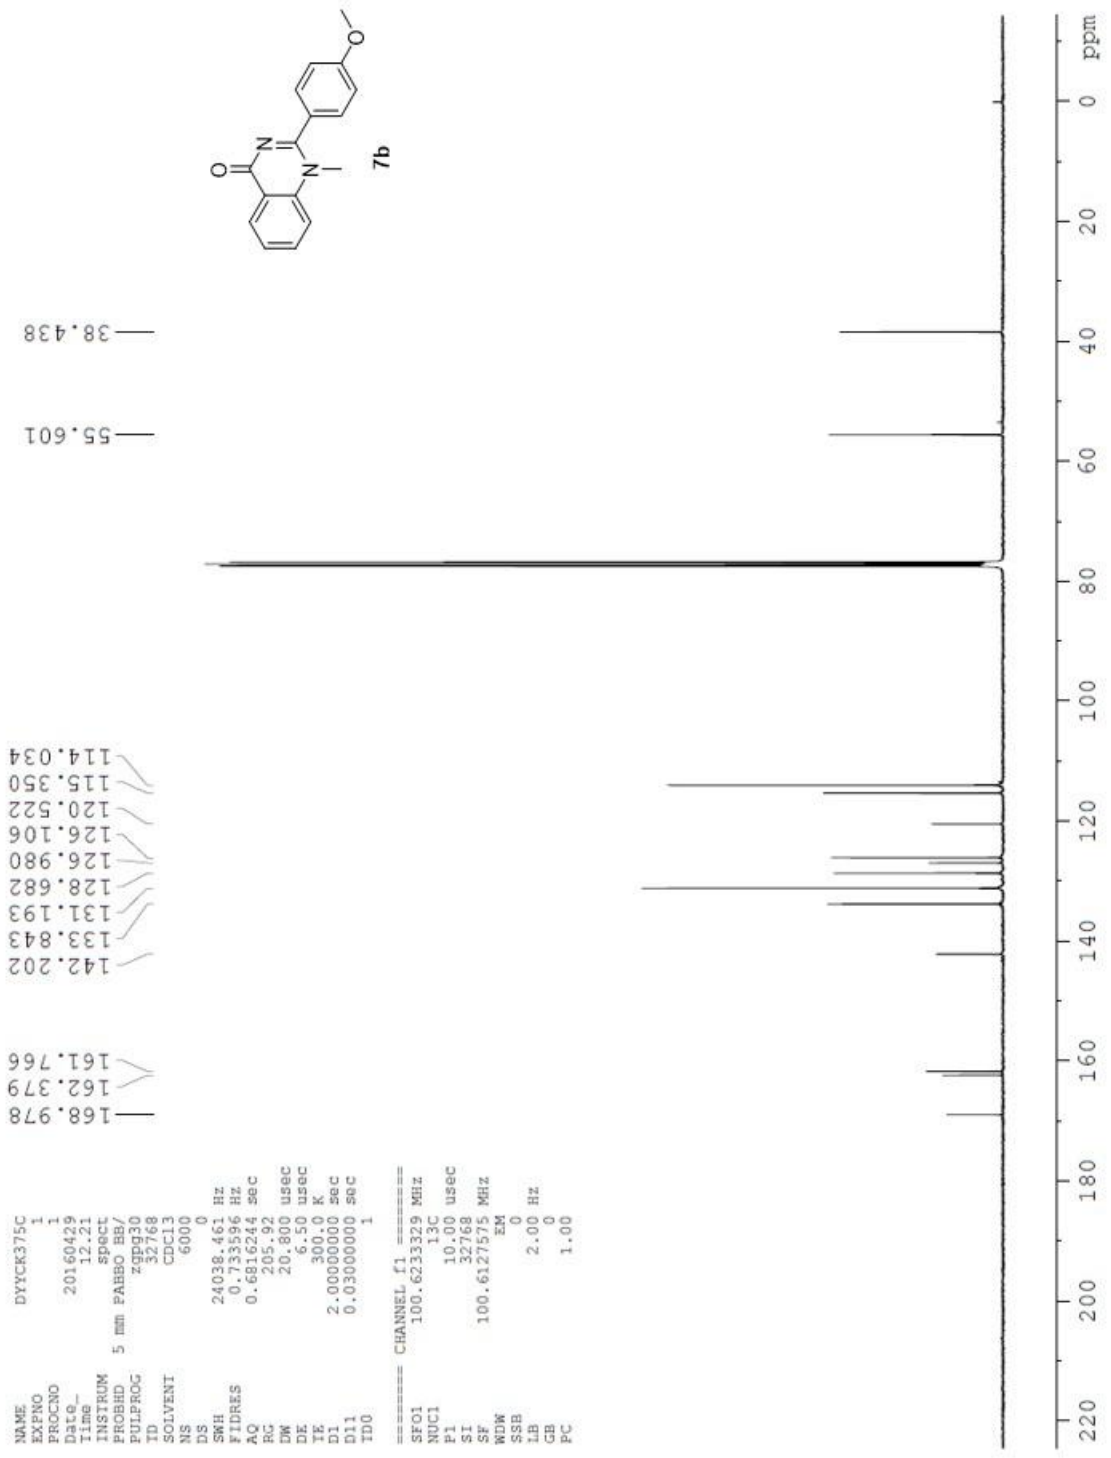

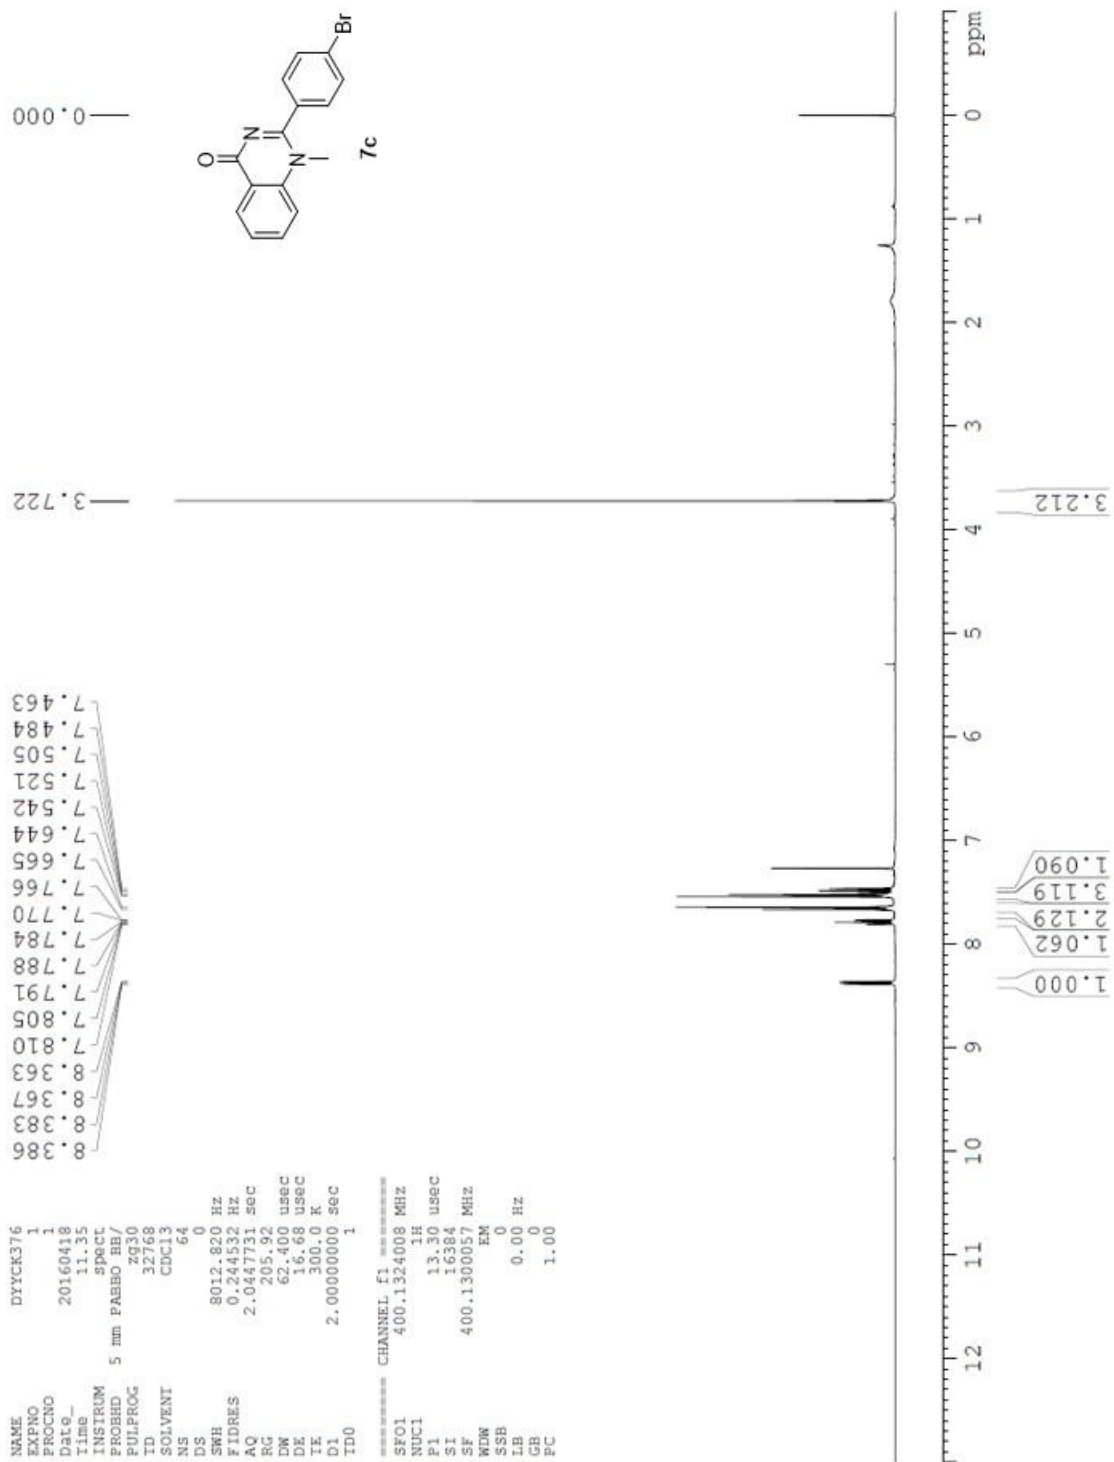

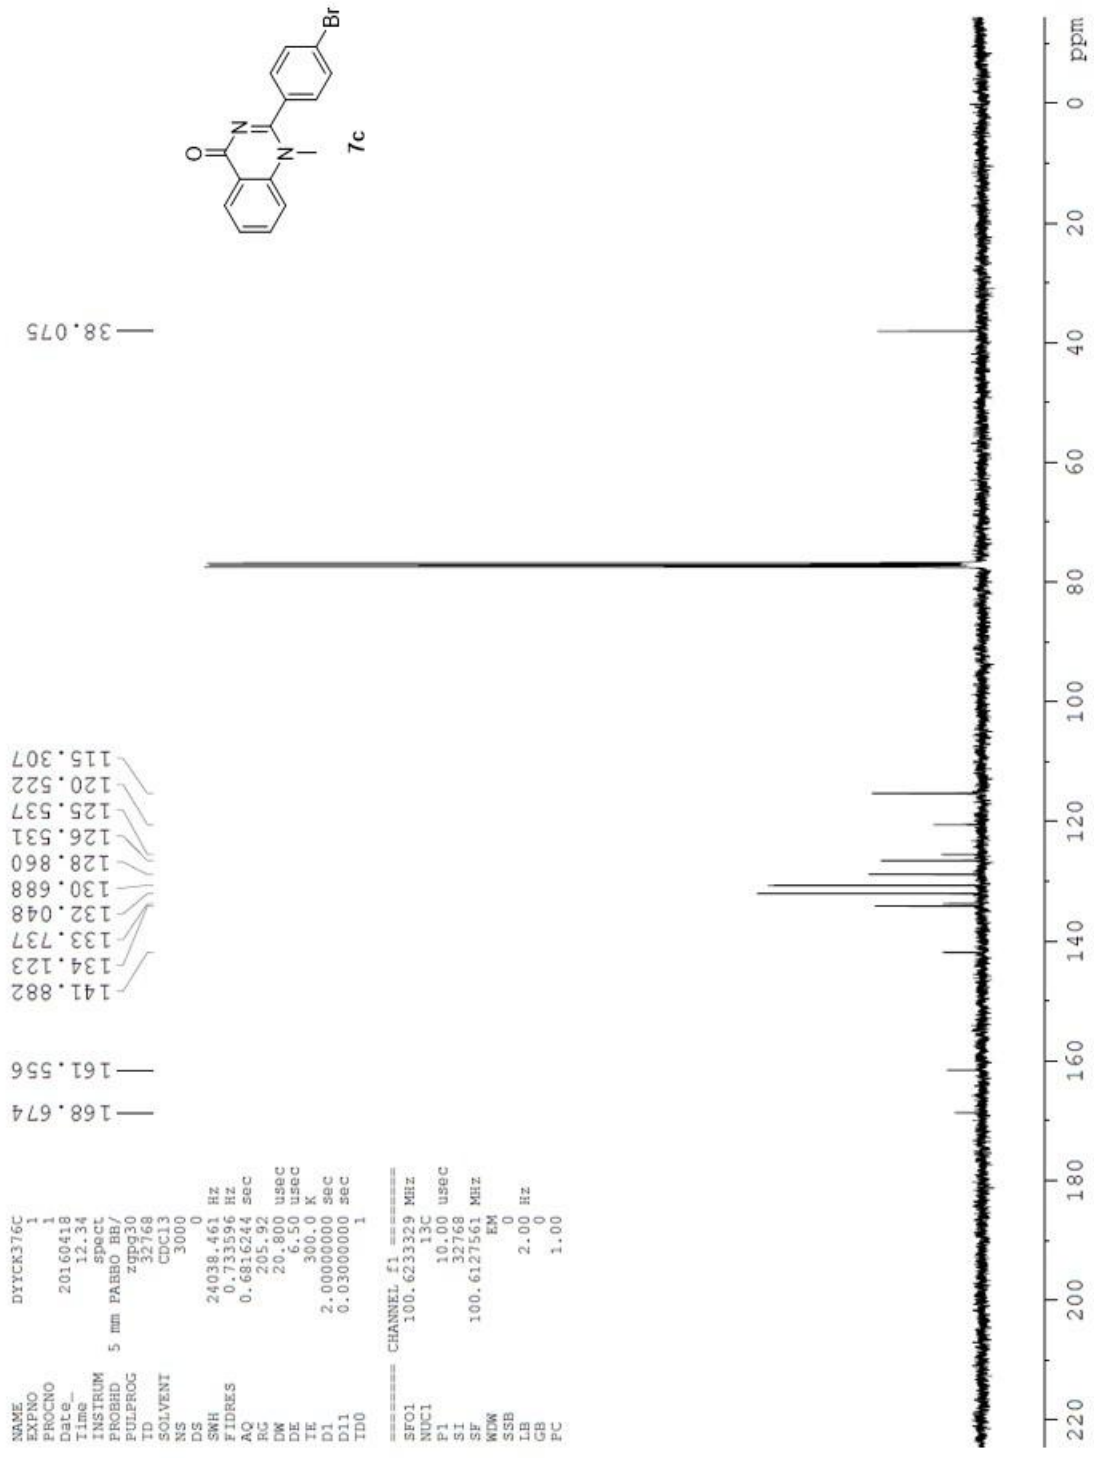

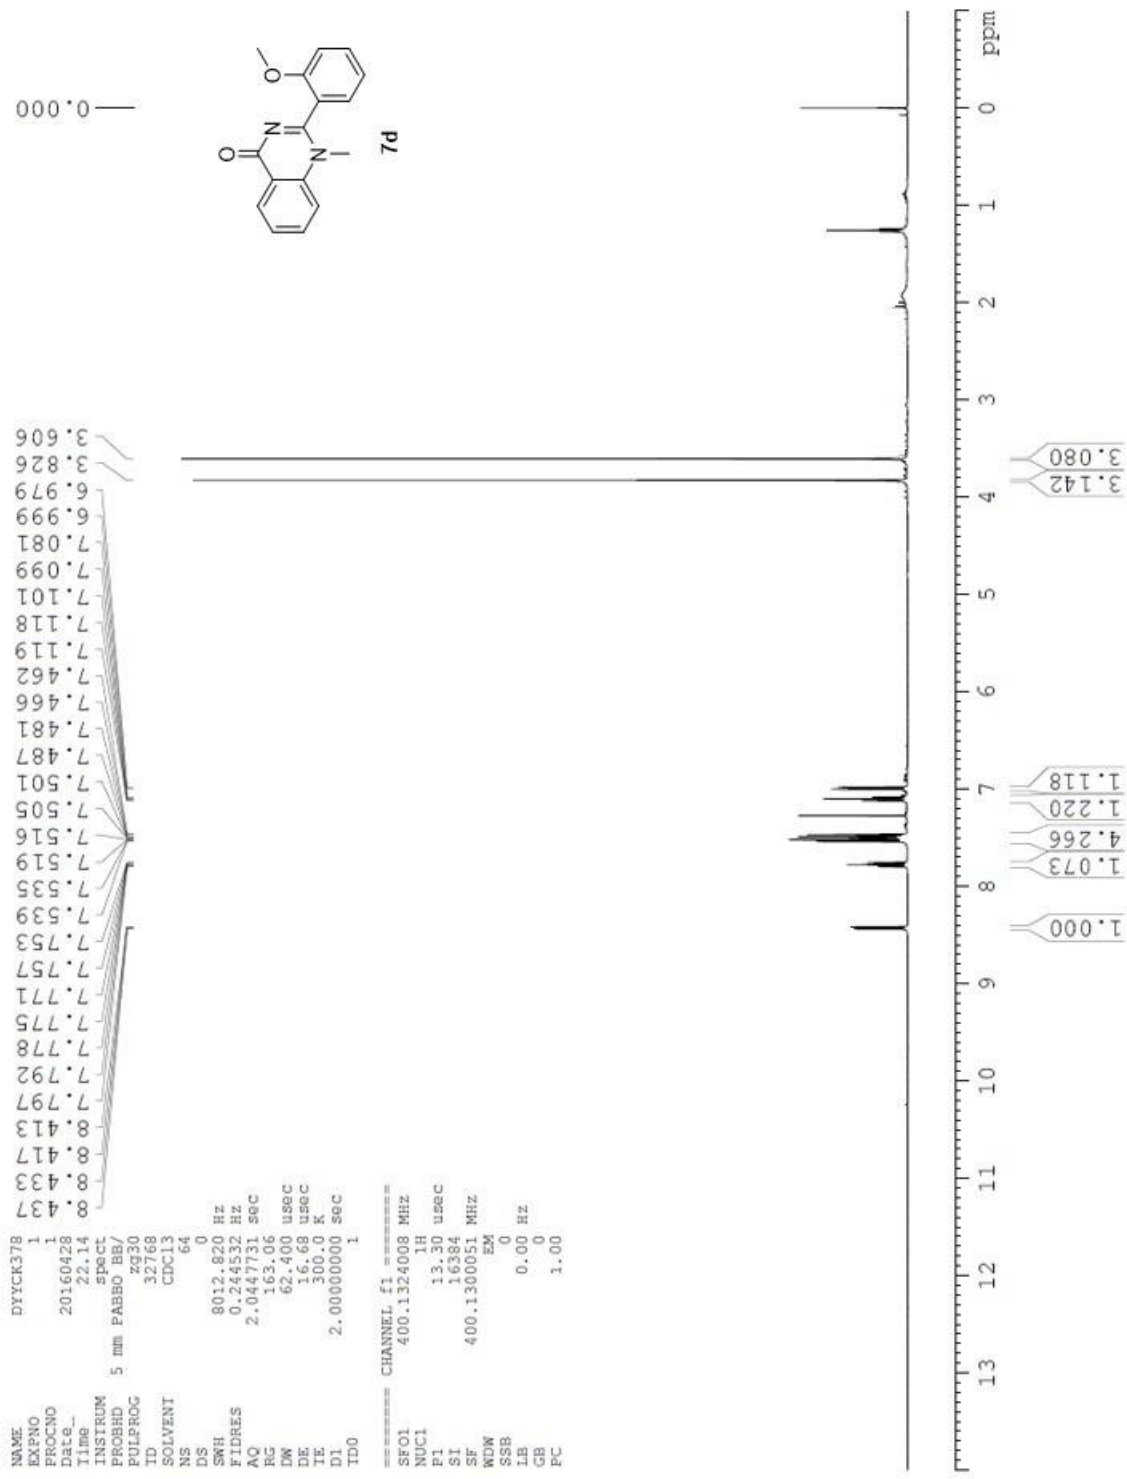

```

NAME          DYYCK378C
EXPNO         1
PROCNO        1
Date_         20160429
Time         2.53
INSTRUM       SP9C
PROBHD        5 mm PABBO BB/
PULPROG       zgpg30
ID            32768
SOLVENT       CDCl3
NS            6000
DS            0
SWH           24038.461 Hz
FIDRES        0.733596 Hz
AQ            0.6816244 sec
RG            205.92
DW            20.800 usec
DE            6.50 usec
TE            300.0 K
D1            2.0000000 sec
D11           0.0300000 sec
ID0           1
===== CHANNEL f1 =====
SFO1          100.6233329 MHz
NUC1          13C
P1            10.00 usec
SI            32768
SF            100.6127575 MHz
WDW           EM
SSB           0
LB            2.00 Hz
GB            0
PC            1.00

```

```

169.184
160.880
156.199
141.513
133.854
132.040
130.624
128.862
126.130
124.591
121.373
120.466
115.164
110.980

```

```

55.798
36.171

```

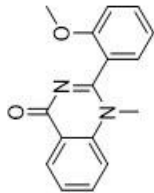

7d

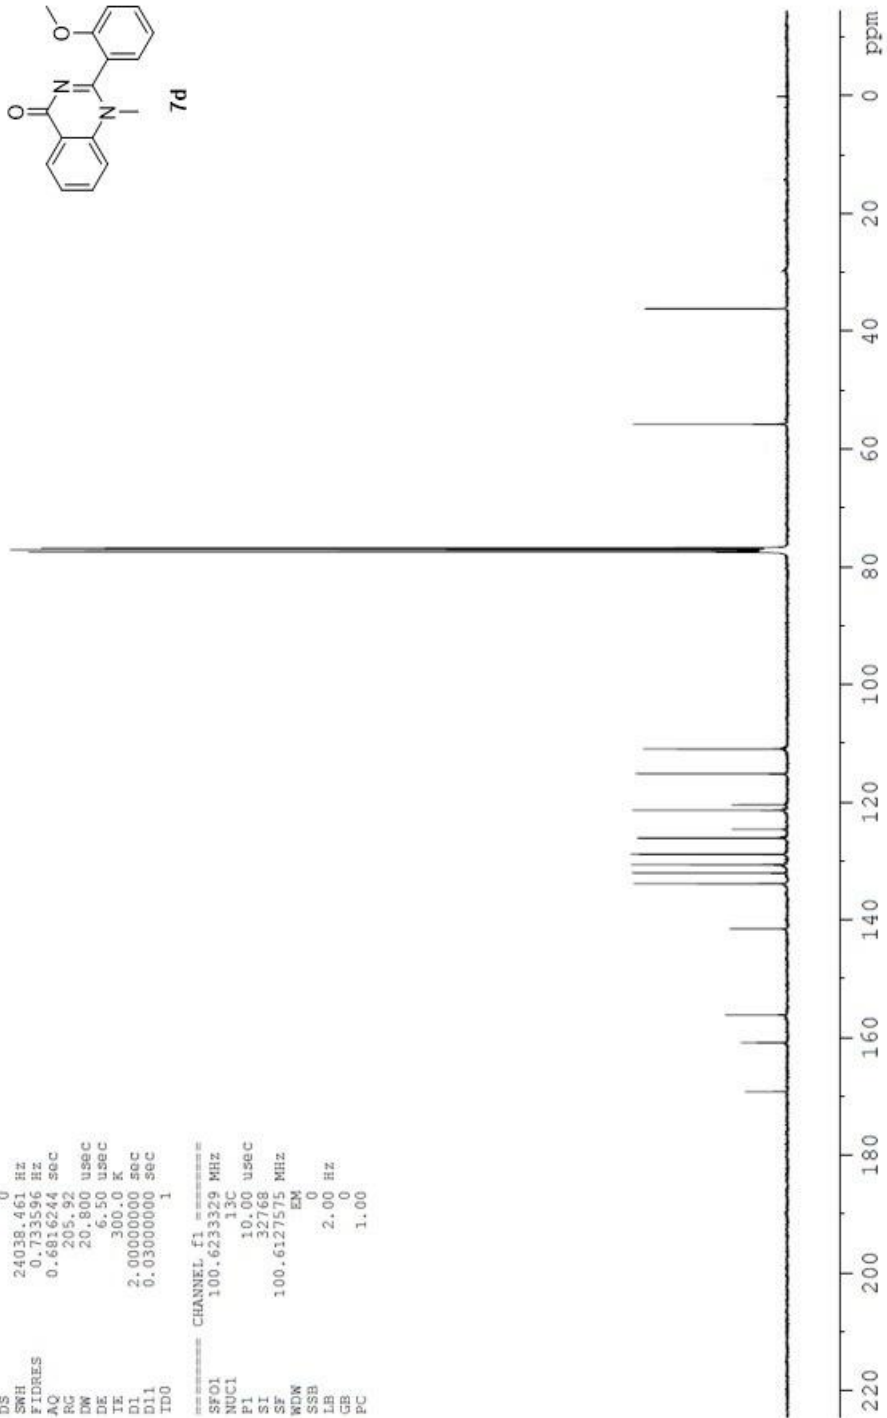

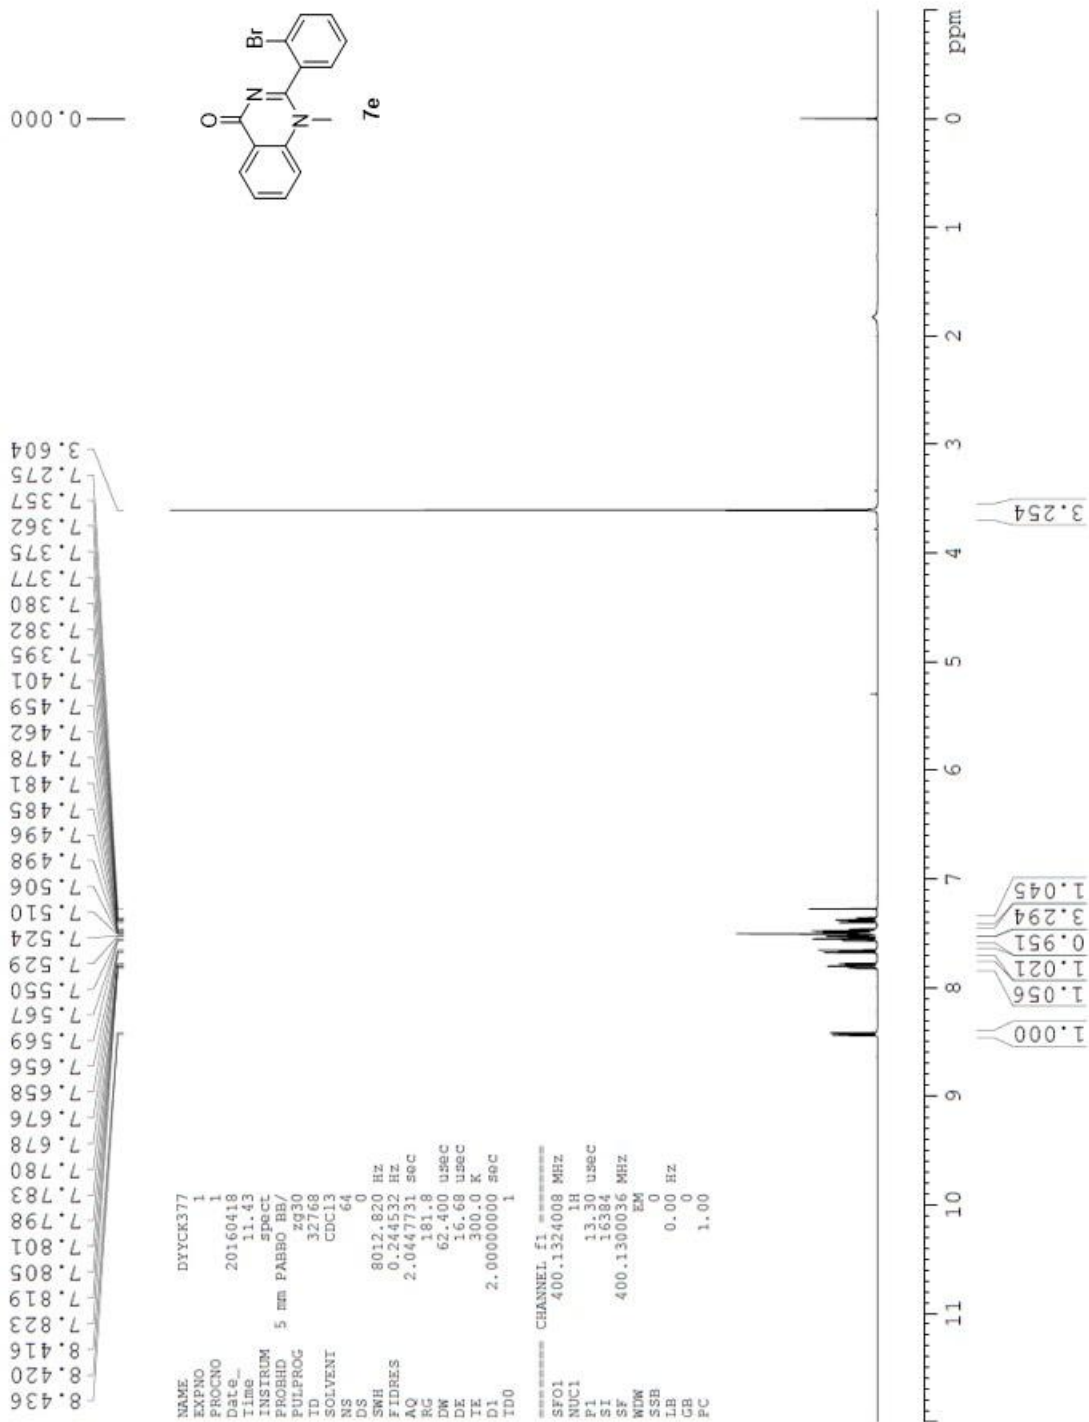

```

NAME          DYVCK377C
EXPNO         1
PROCNO        1
Date_         20160418
Time          17.05
INSTRUM       spect
PROBHD        5 mm PABBO BB/
PULPROG       zgpg30
TD            32768
SOLVENT       CDC13
NS            3000
DS            0
SMH           24038.461 Hz
FIDRES        0.733596 Hz
AQ            0.6816244 sec
RG            205.92
DW            20.800 usec
DE            6.50 usec
TE            300.0 K
D1            2.00000000 sec
D11           0.03000000 sec
ID0           1
===== CHANNEL f1 =====
SFO1          100.6233329 MHz
NUC1          13C
P1            10.00 usec
SFO1          100.6233329 MHz
SF            100.6127580 MHz
WDW           EM
SSB           0
LB            2.00 Hz
GB            0
FC            1.00

```

```

168.699
160.942
141.133
136.524
134.163
132.910
131.477
129.942
128.982
128.157
126.594
121.068
120.643
115.235

```

35.974

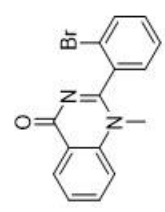

7e

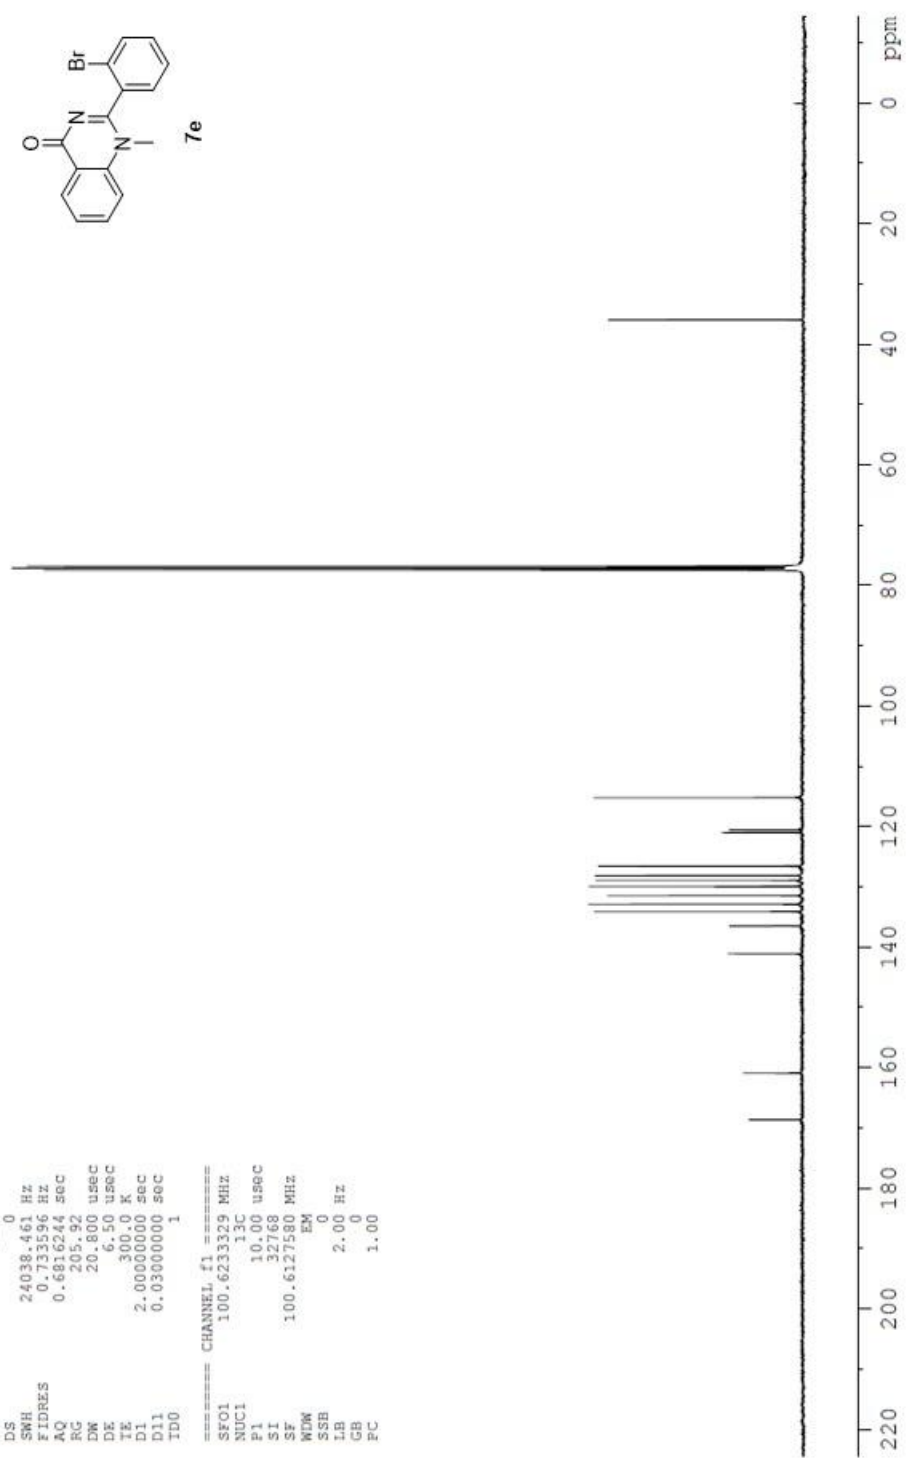

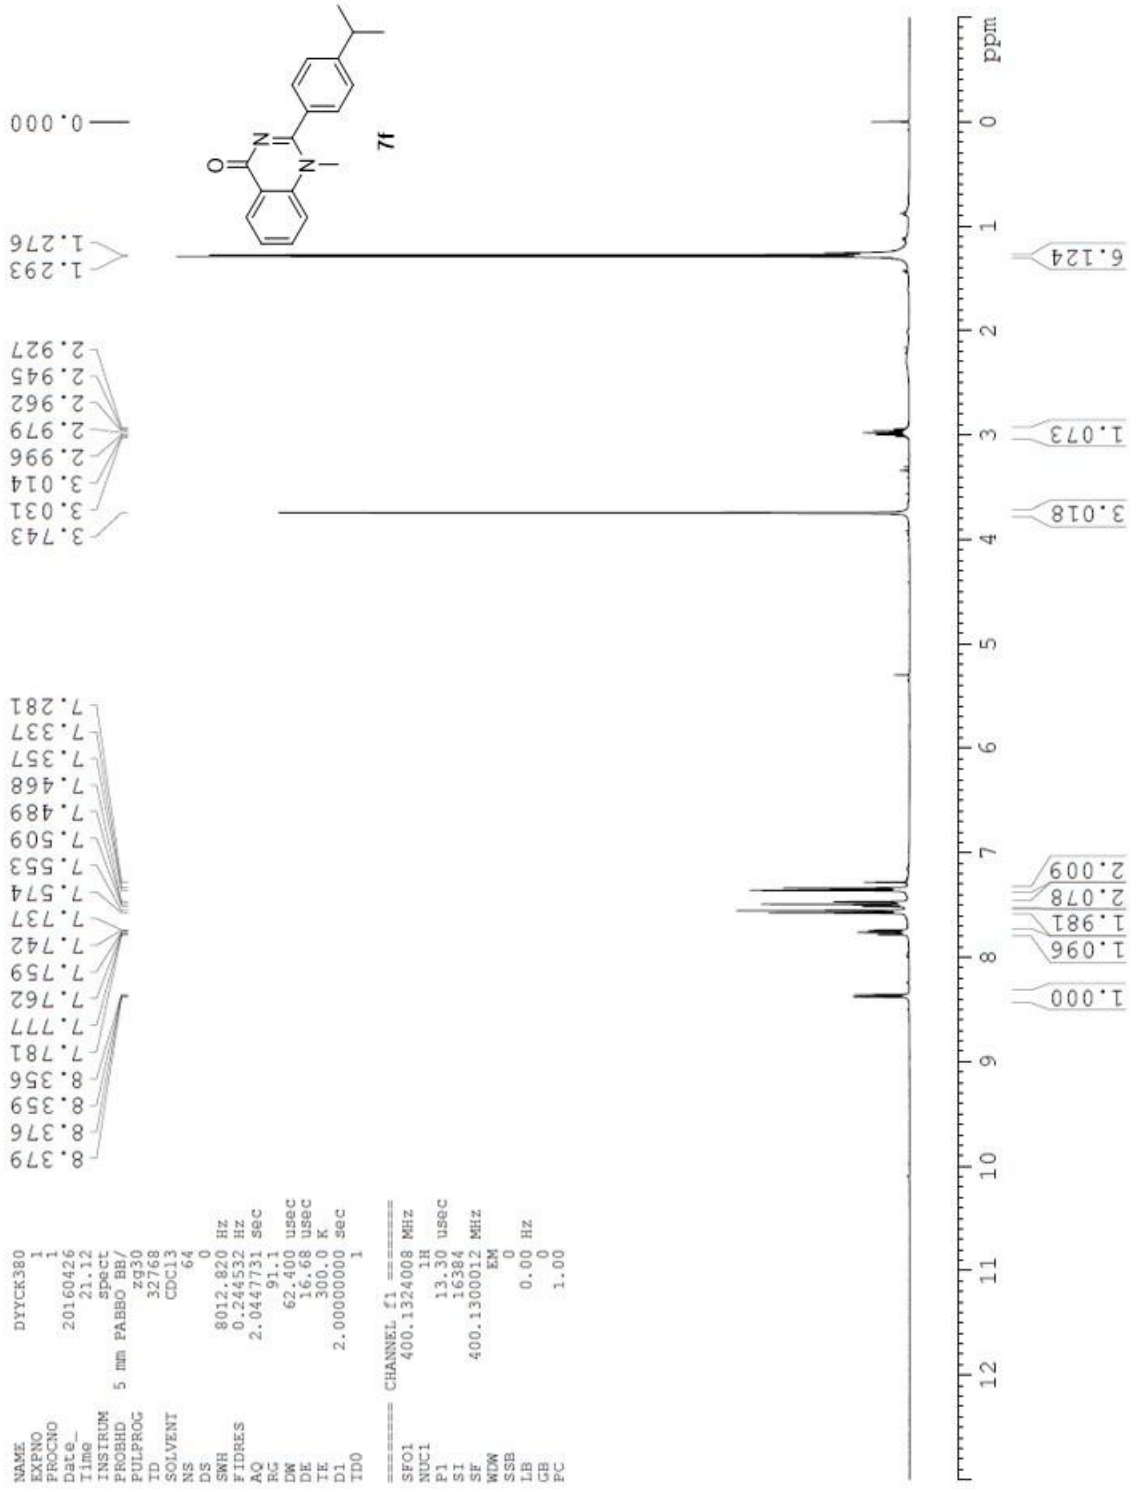



NAME DYYCR380C  
 EXPNO 1  
 PROCNO 1  
 Date\_ 20160427  
 Time 3.18  
 INSTRUM spect  
 PROBHD 5 mm PABBO BE/  
 PULPROG zgpg30  
 ID 32768  
 SOLVENT CDCl3  
 NS 3000  
 DS 0  
 SWH 24039.461 Hz  
 FIDRES 0.733596 Hz  
 AQ 0.6816244 sec  
 RG 205.92  
 DW 20.800 usec  
 DE 6.50 usec  
 TE 300.0 K  
 D1 2.0000000 sec  
 D11 0.03000000 sec  
 ID0 1

168.921  
 162.720  
 152.075  
 142.000  
 133.892  
 132.257  
 129.192  
 128.642  
 126.763  
 126.152  
 120.451  
 115.354

38.203  
 34.200  
 23.864

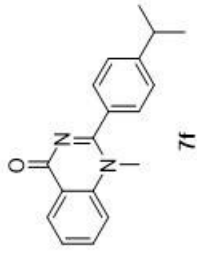

CHANNEL f1  
 SF01 100.6233329 MHz  
 NUC1 13C  
 P1 10.00 usec  
 SI 32768  
 SF 100.6127504 MHz  
 WDW EM  
 SSB 0  
 LB 2.00 Hz  
 GB 0  
 PC 1.00

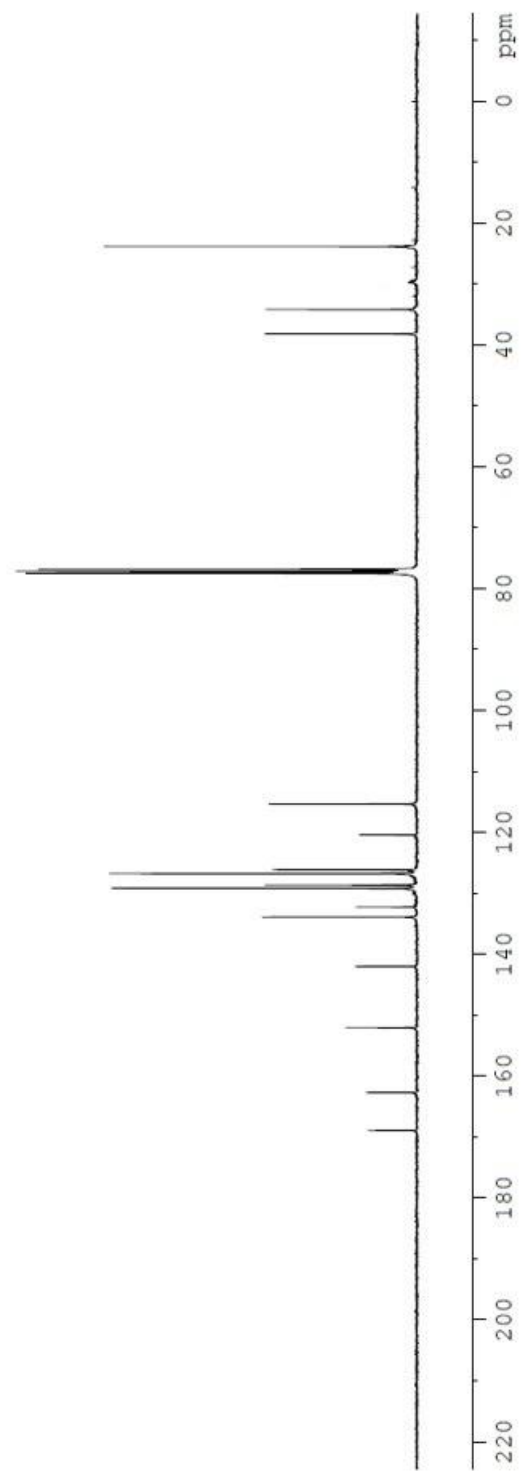

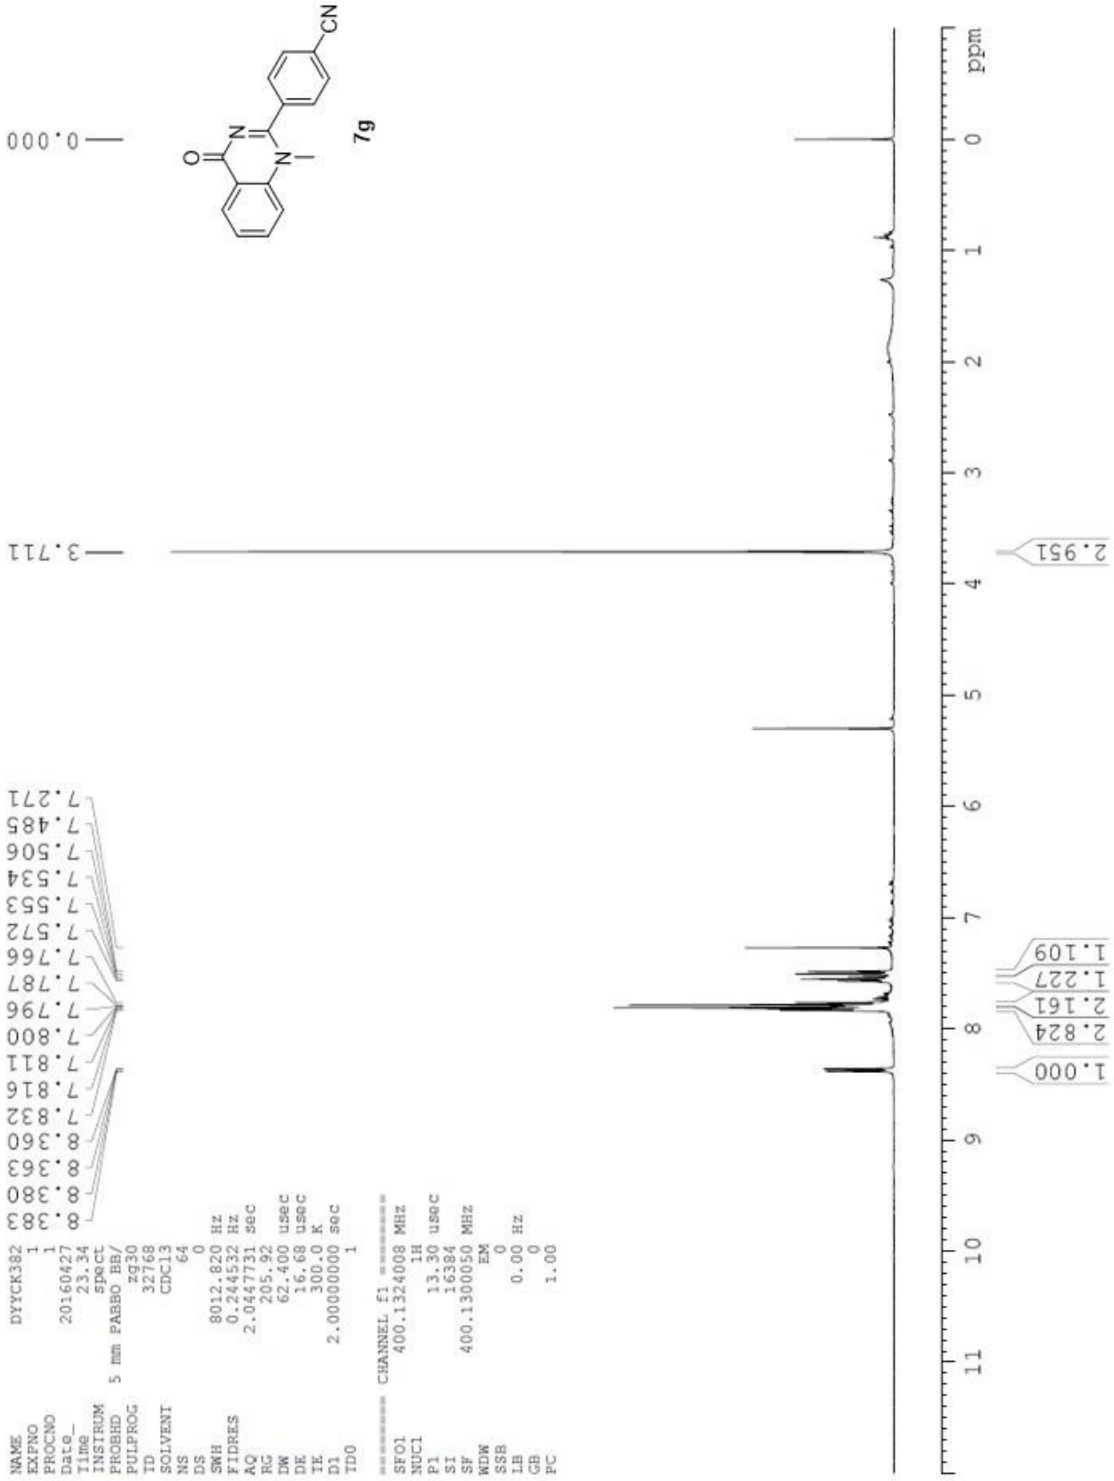

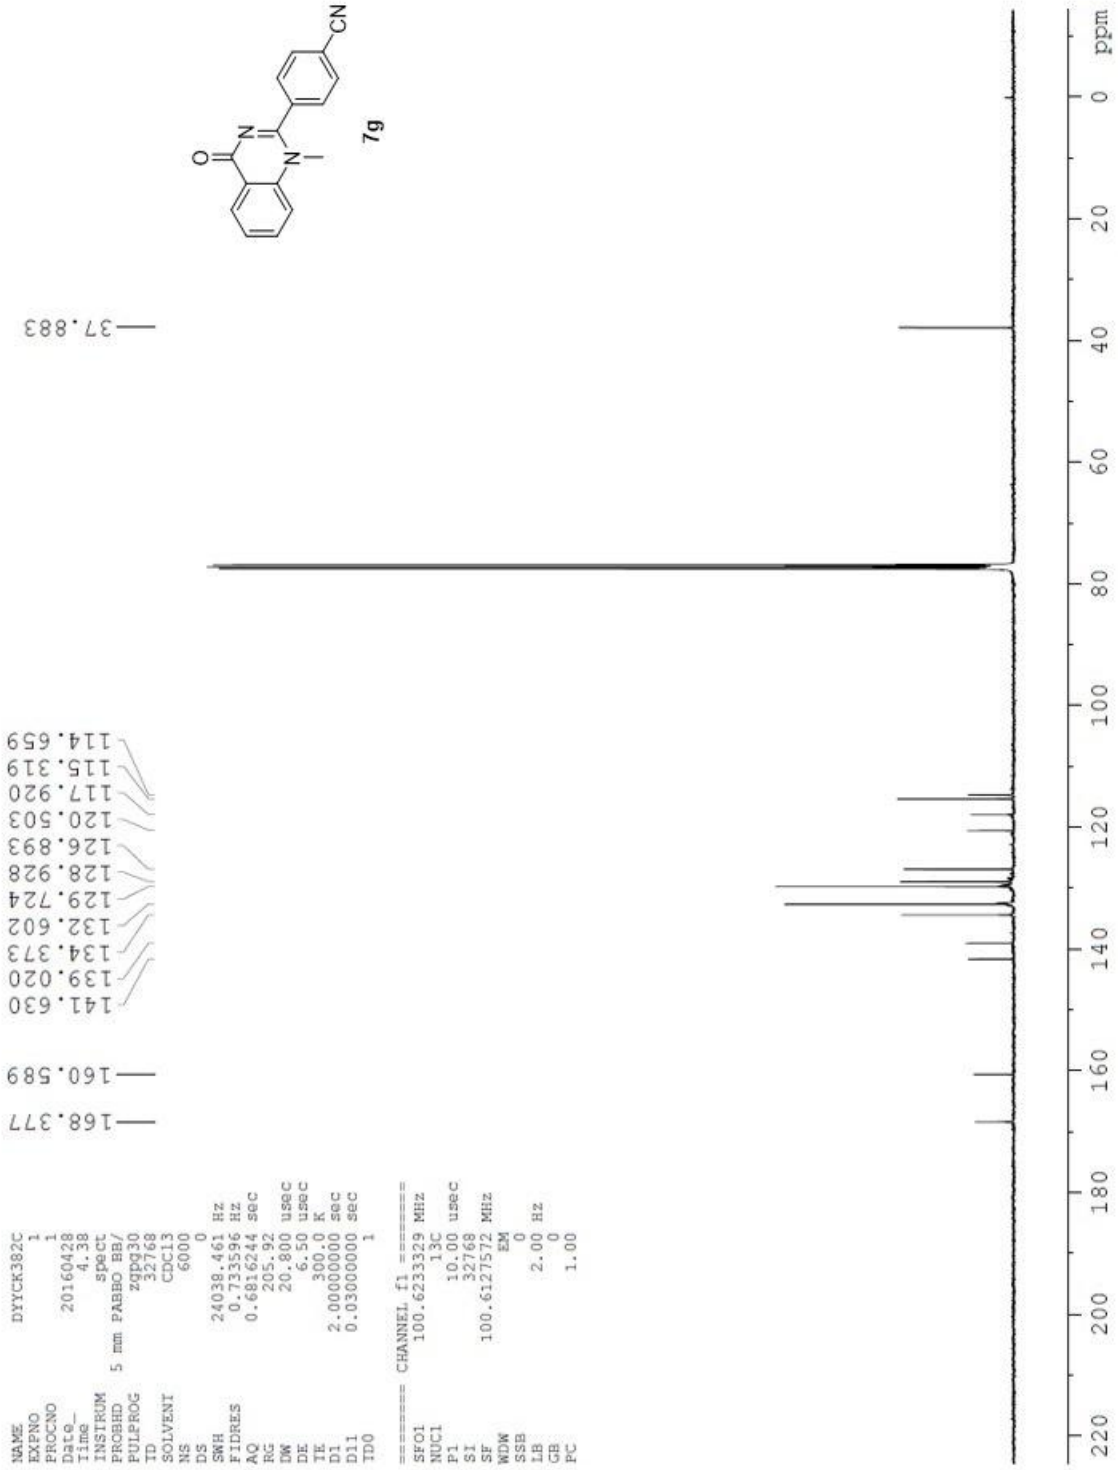

```

NAME          DYYCK349
EXPNO         1
PROCNO        1
Date_         20160317
Time          13.16
INSTRUM       spect
PROBHD        5 mm PABBO BB/
PULPROG       zg30
TD            32768
SOLVENT       DMSO
NS            64
DS            0
SWH           8012.820 Hz
FIDRES       0.244532 Hz
AQ           2.0447731 sec
RG           163.06
RW           62.400 usec
DE           16.68 usec
TE           300.0 K
D1           2.00000000 sec
TD0          1

===== CHANNEL f1 =====
SFO1         400.1324008 MHz
NUC1         1H
P1           13.30 usec
SI           16384
SF           400.1300035 MHz
WDW          EM
SSB          0
LB           0.00 Hz
GB           0
PC           1.00

```

```

9.531
9.517
9.505
9.284
9.536
9.514
9.502
9.482
9.320
9.317
9.302
9.298
9.280
9.277
9.200
9.185
9.179
9.164
9.091
8.072
8.053

```

```

2.504
2.500
2.496

```

```
4.648
```

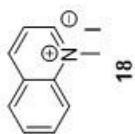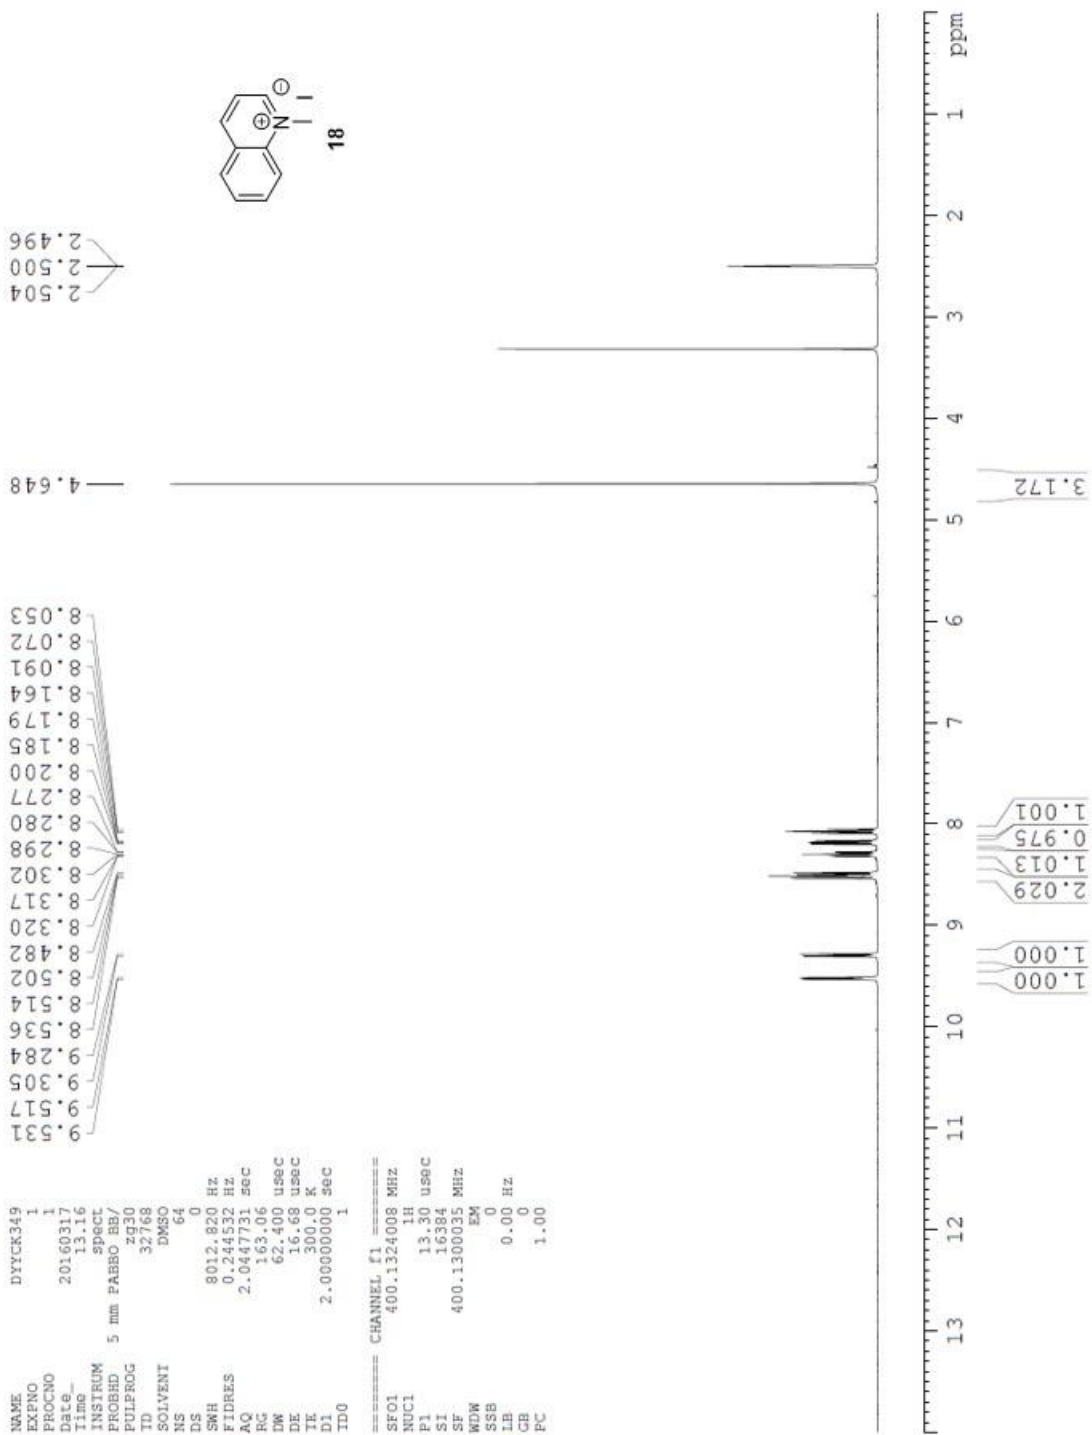

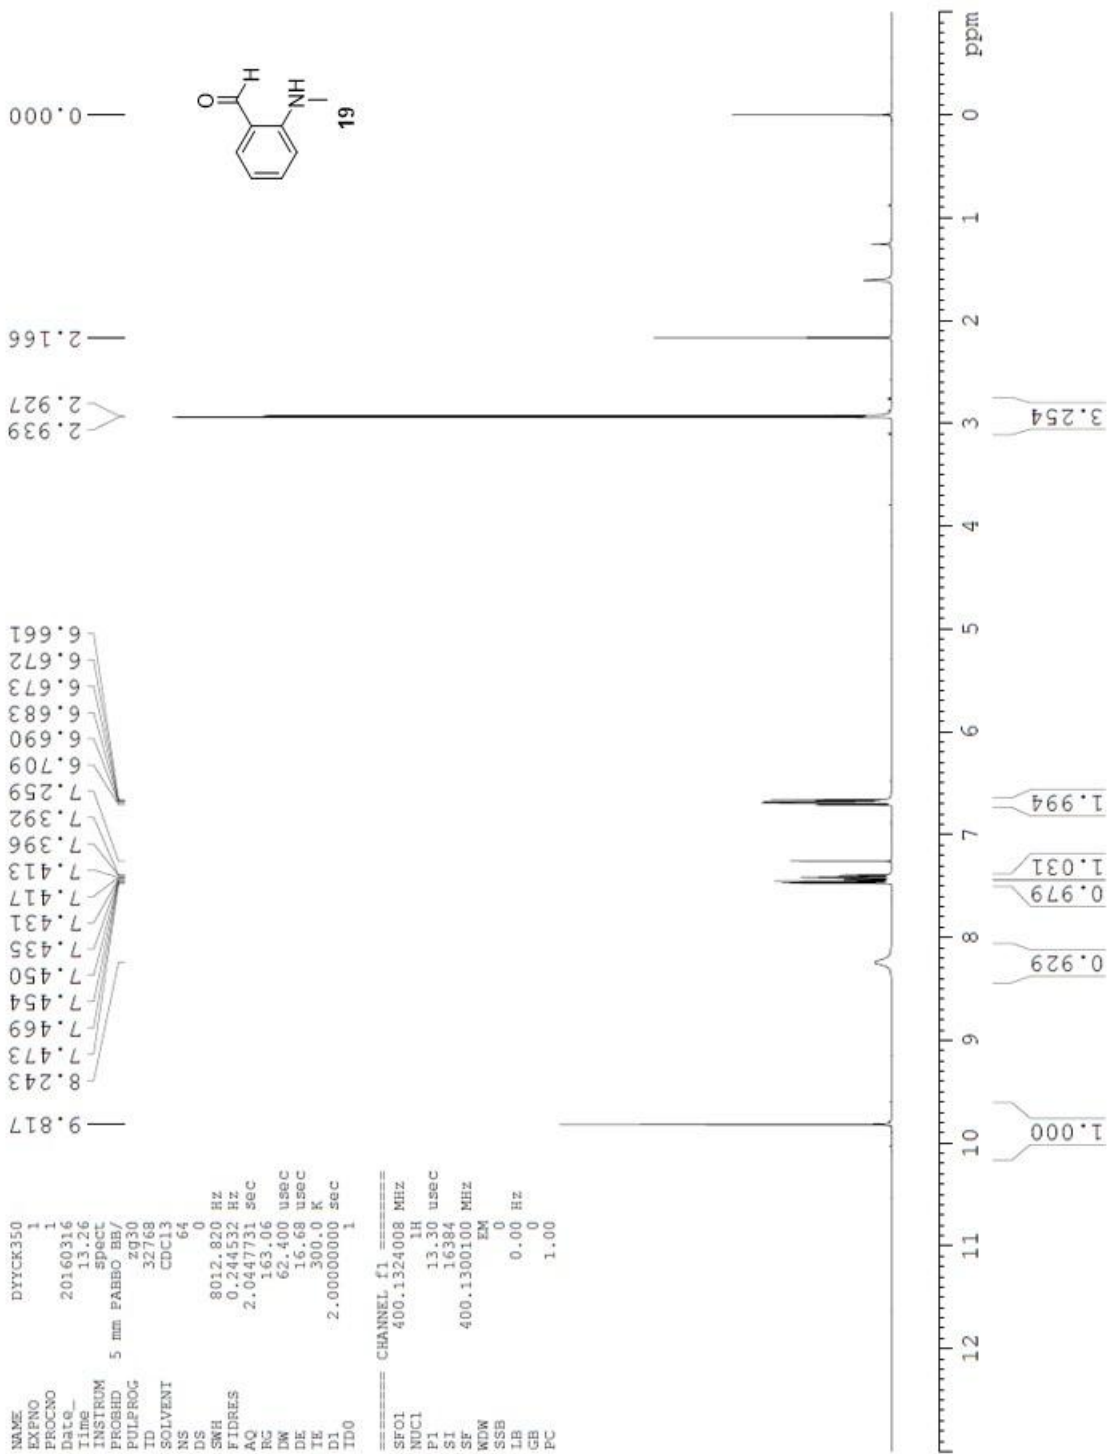

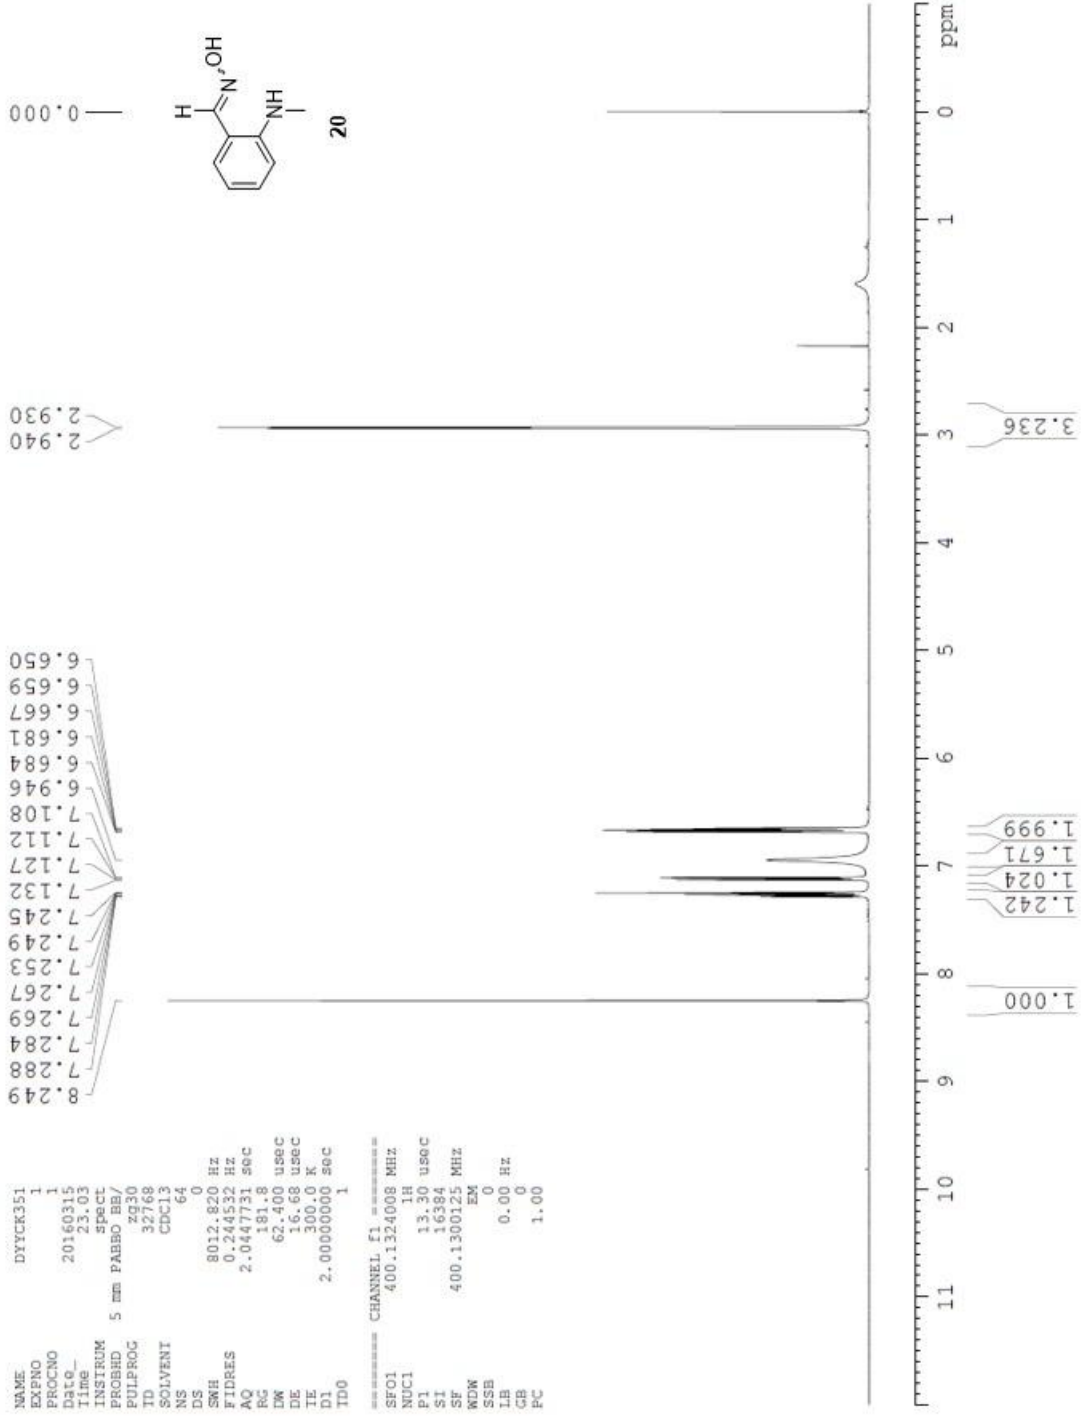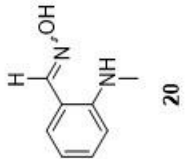

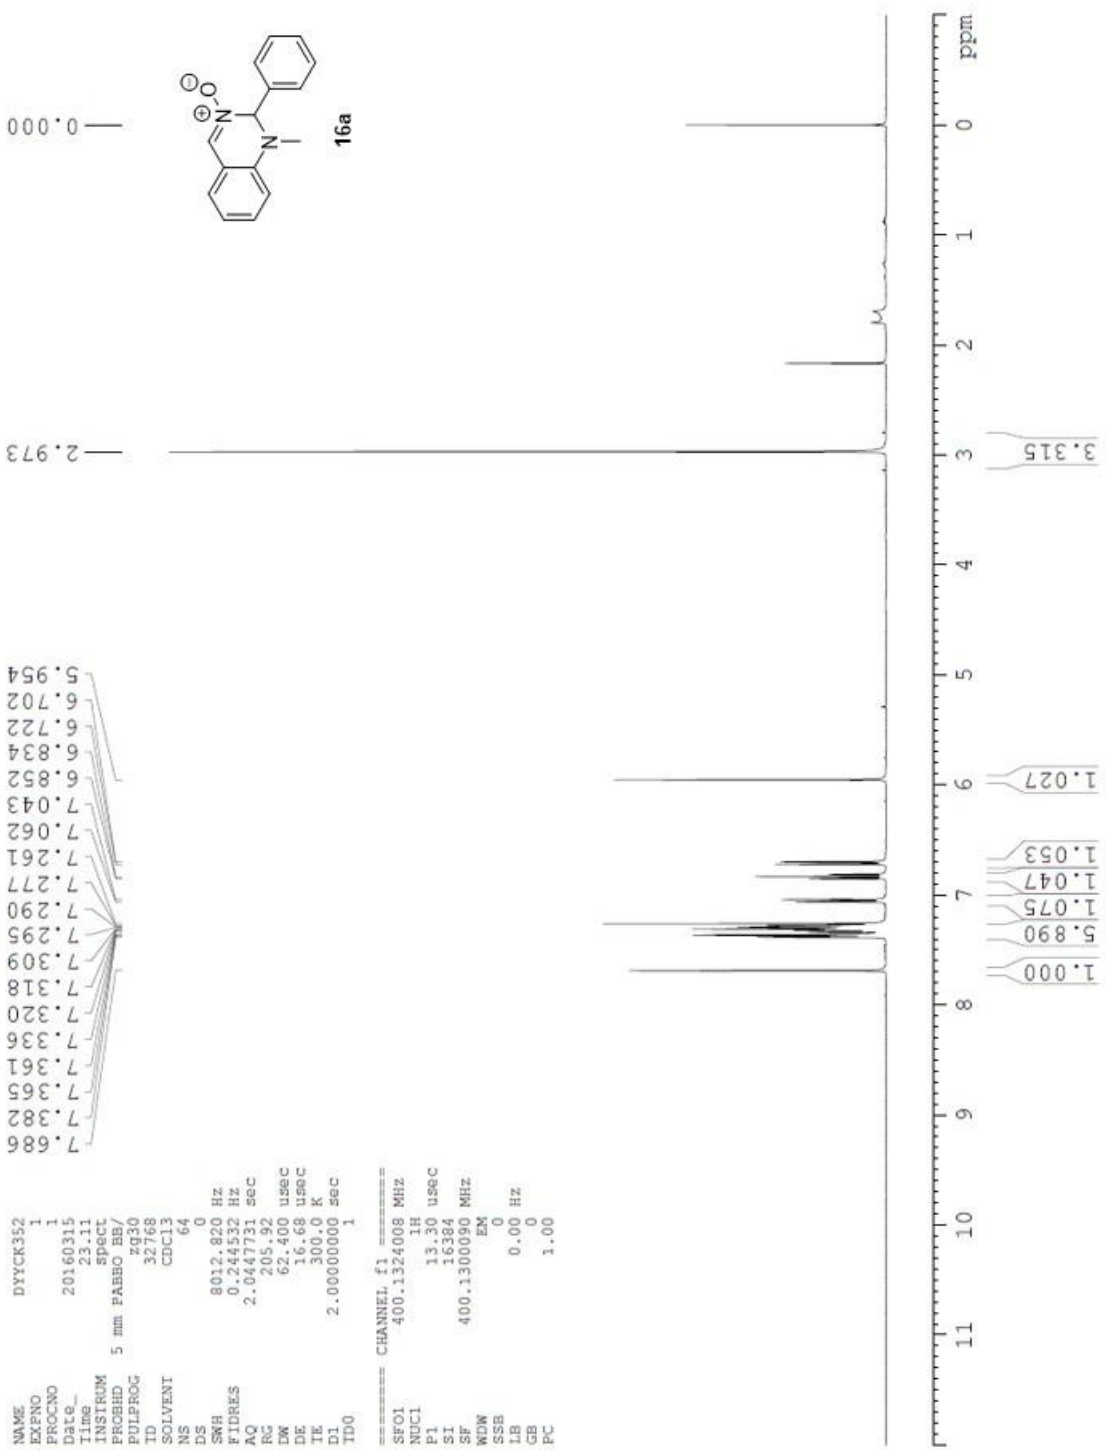

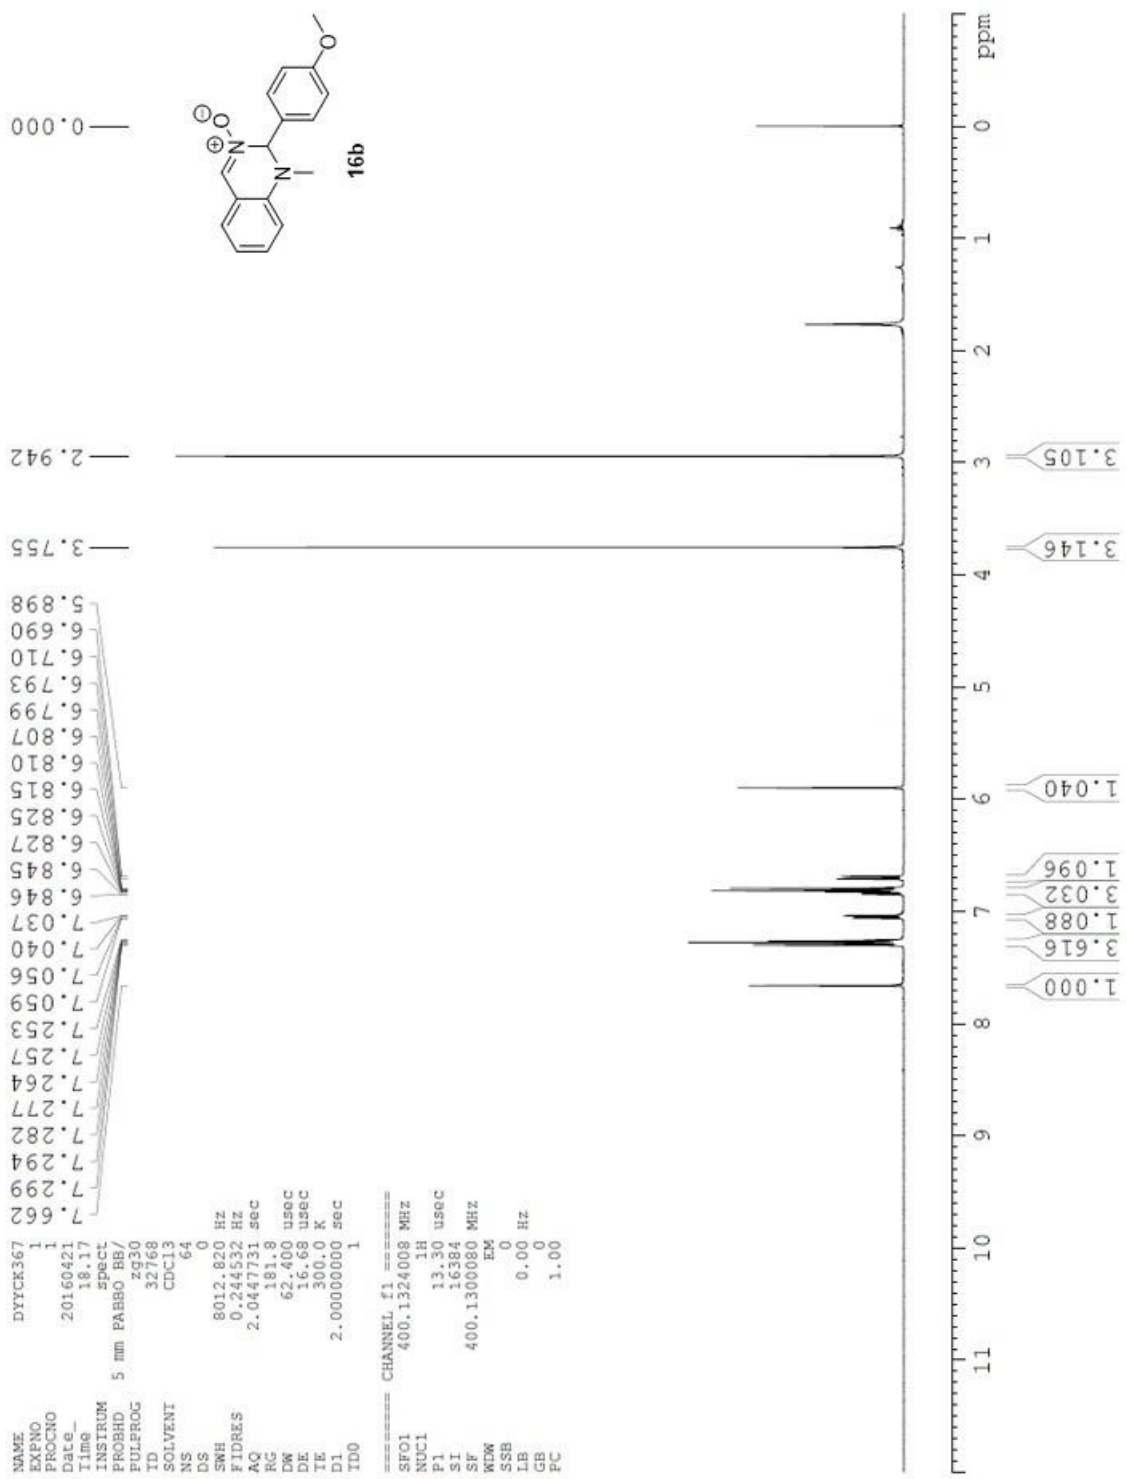



```

NAME          DYYCK367C
EXPNO         2
PROCNO        1
Date_         20160421
Time         16.22
INSTRUM       spect
PROBHD        5 mm PABBO BB/
PULPROG       zgpg30
TD            32768
SOLVENT       CDCl3
NS            2000
DS            0
SWH           24038.461 HZ
FIDRES       0.733596 HZ
AQ           0.6816244 sec
RG           205.92
LW           20.800 usec
DE           6.50 usec
TE           300.1 K
D1           2.00000000 sec
D11          0.03000000 sec
TD0          1
  
```

```

CHANNEL f1
SFO1        100.6233329 MHz
NUC1        13C
P1          10.00 usec
SI          32768
SF          100.6127557 MHz
WDW         EM
SSB         0
LB          2.00 Hz
GB          0
PC          1.00
  
```

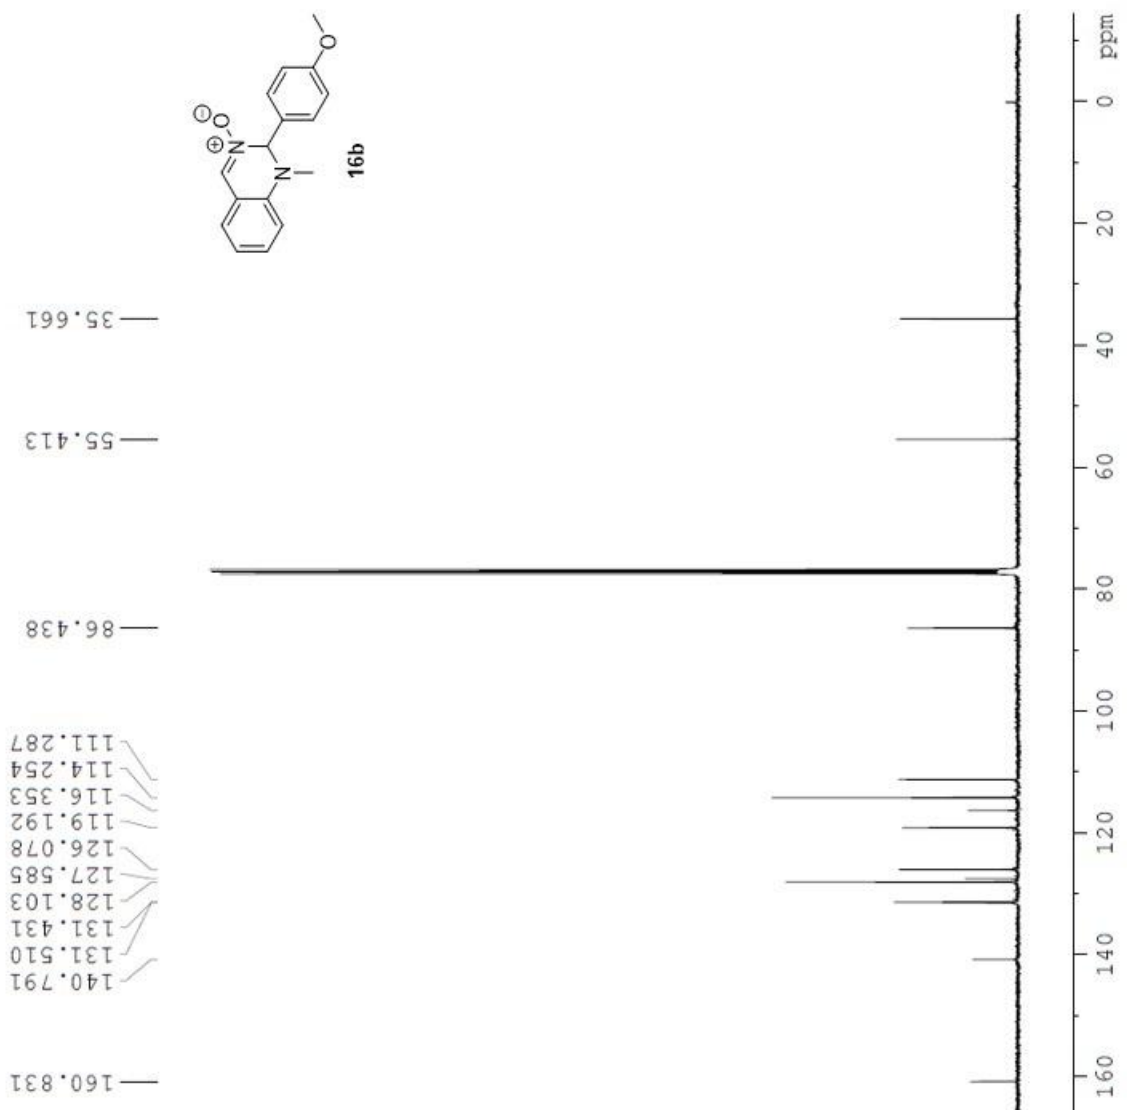

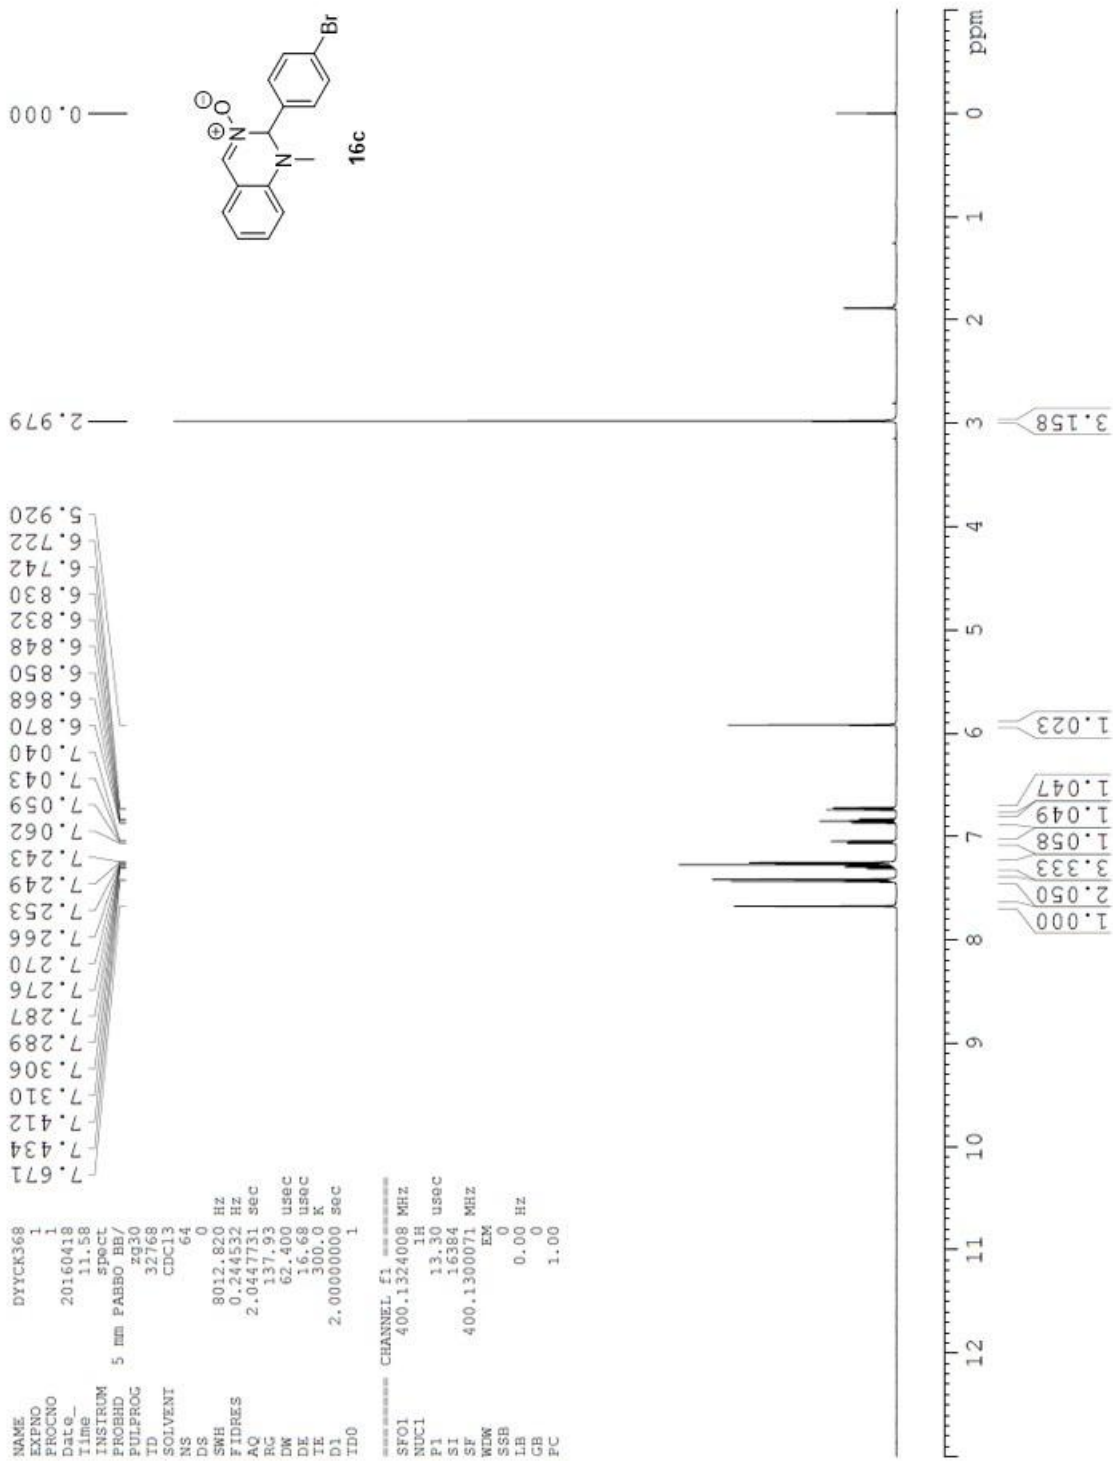

```

NAME          DYCK368C
EXPNO         1
PROCNO        1
Date_         20160418
Time          19.26
INSTRUM       spect
PROBHD        5 mm F4BBO BB/
PULPROG       zgpg30
TD            32768
SOLVENT       CCl3
NS            3000
DS            0
SWH           24038.461 Hz
FIDRES        0.732596 Hz
AQ            0.6816244 sec
RG            205.92
DE            20.800 usec
TE            300.0 K
D1            2.00000000 sec
D11           0.03000000 sec
ID0           1

=====
CHANNEL f1
SFO1          100.6233329 MHz
NUC1          13C
P1            10.00 usec
SI            32768
SF            100.6127580 MHz
WDW           EM
SSB           0
LB            2.00 Hz
GB            0
PC            1.00

```

```

140.388
134.275
132.082
131.604
131.560
128.384
126.159
124.089
119.683
116.409
111.734

```

```

86.157
36.146

```

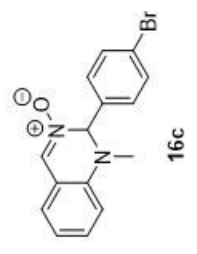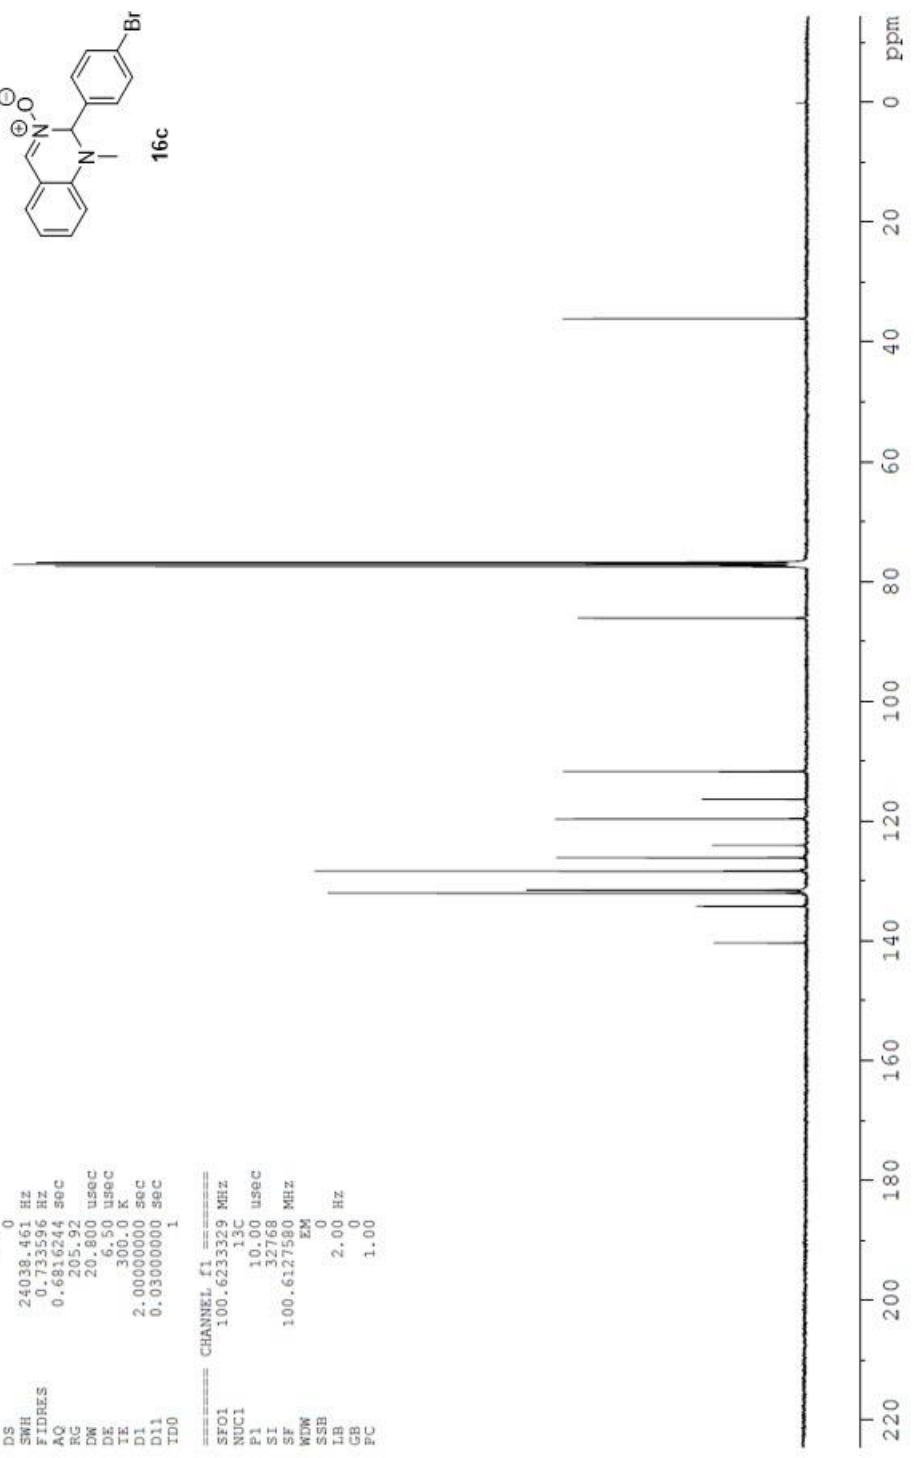

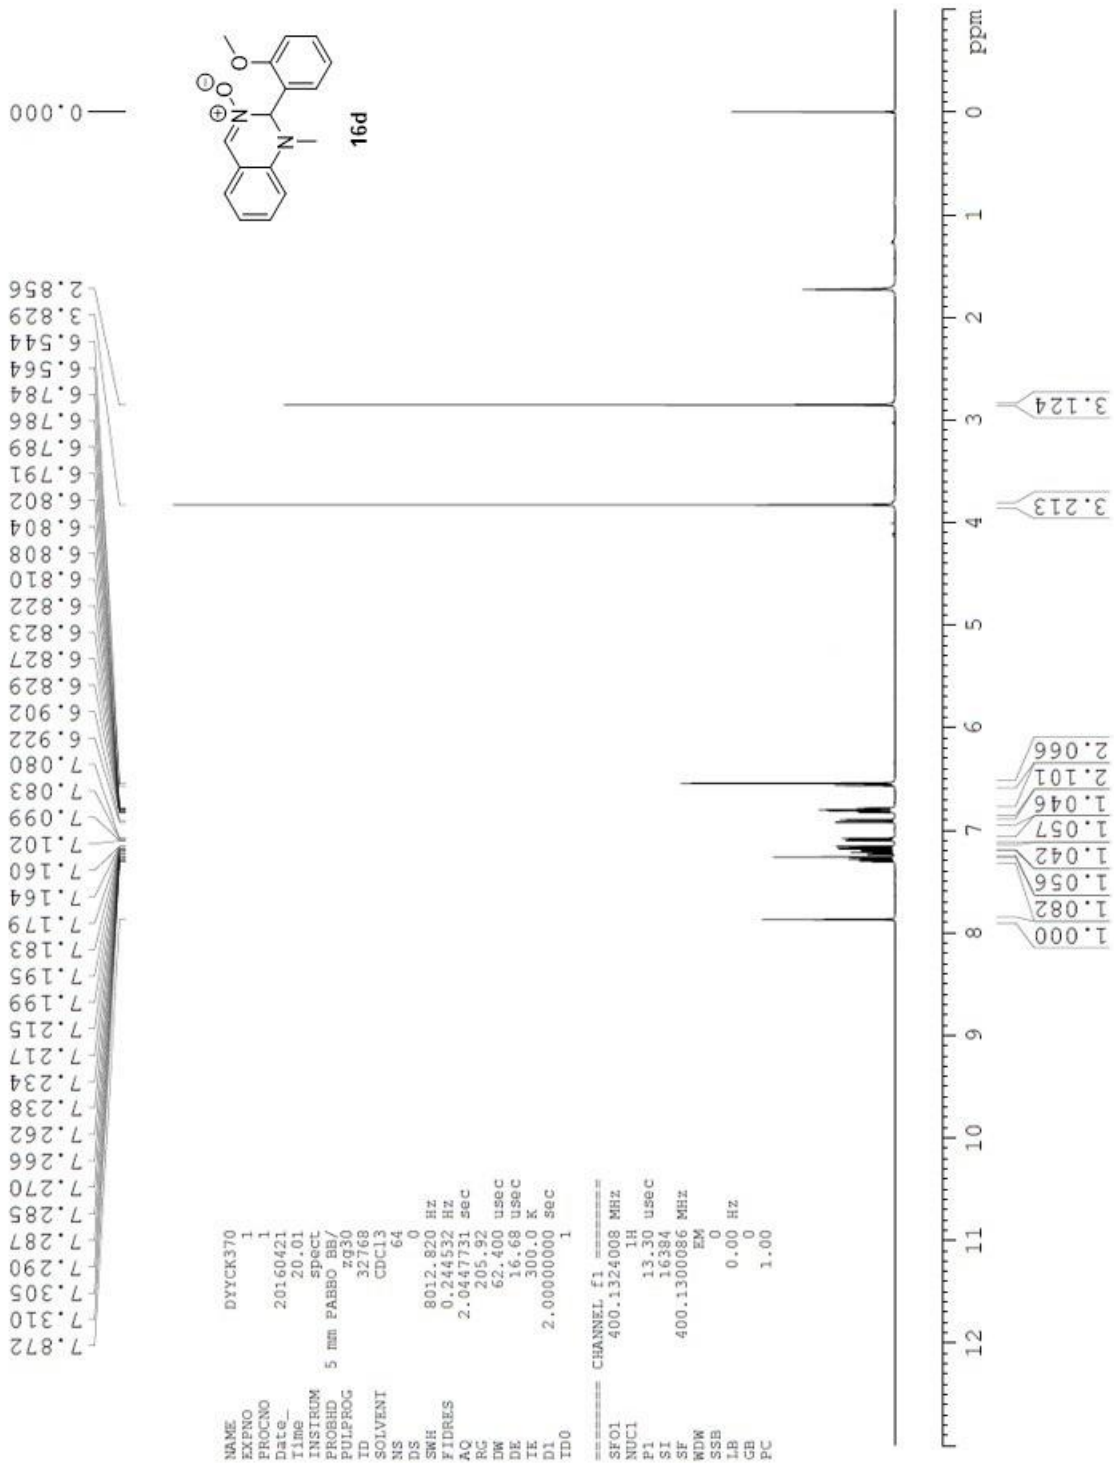

```

NAME          DYYCK370C
EXPNO         2
PROCNO        1
Date_         20160421
Time_         21.15
INSTRUM       spect
PROBHD        5 mm PABBO BB/
PULPROG       zgpg30
TD            32768
SOLVENT       CDCl3
NS            2000
DS            0
SWH           24036.461 Hz
FIDRES        0.733596 Hz
AQ            0.6816244 sec
RG            205.92
DW            20.800 usec
DE            6.50 usec
TE            300.0 K
D1            2.00000000 sec
D11           0.03000000 sec
TD0           1
===== CHANNEL f1 =====
SF01          100.6233329 MHz
NUC1          13C
P1            10.00 usec
SI            32768
SF            100.6127555 MHz
WDW           EM
SSB           0
LB            2.00 Hz
GB            0
PC            1.00

```

```

156.931
140.585
133.288
131.331
131.048
127.039
125.674
123.953
121.171
118.776
116.692
111.397
111.282

```

```

80.136
55.846
34.873

```

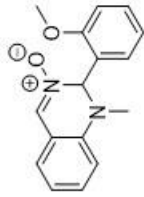

16d

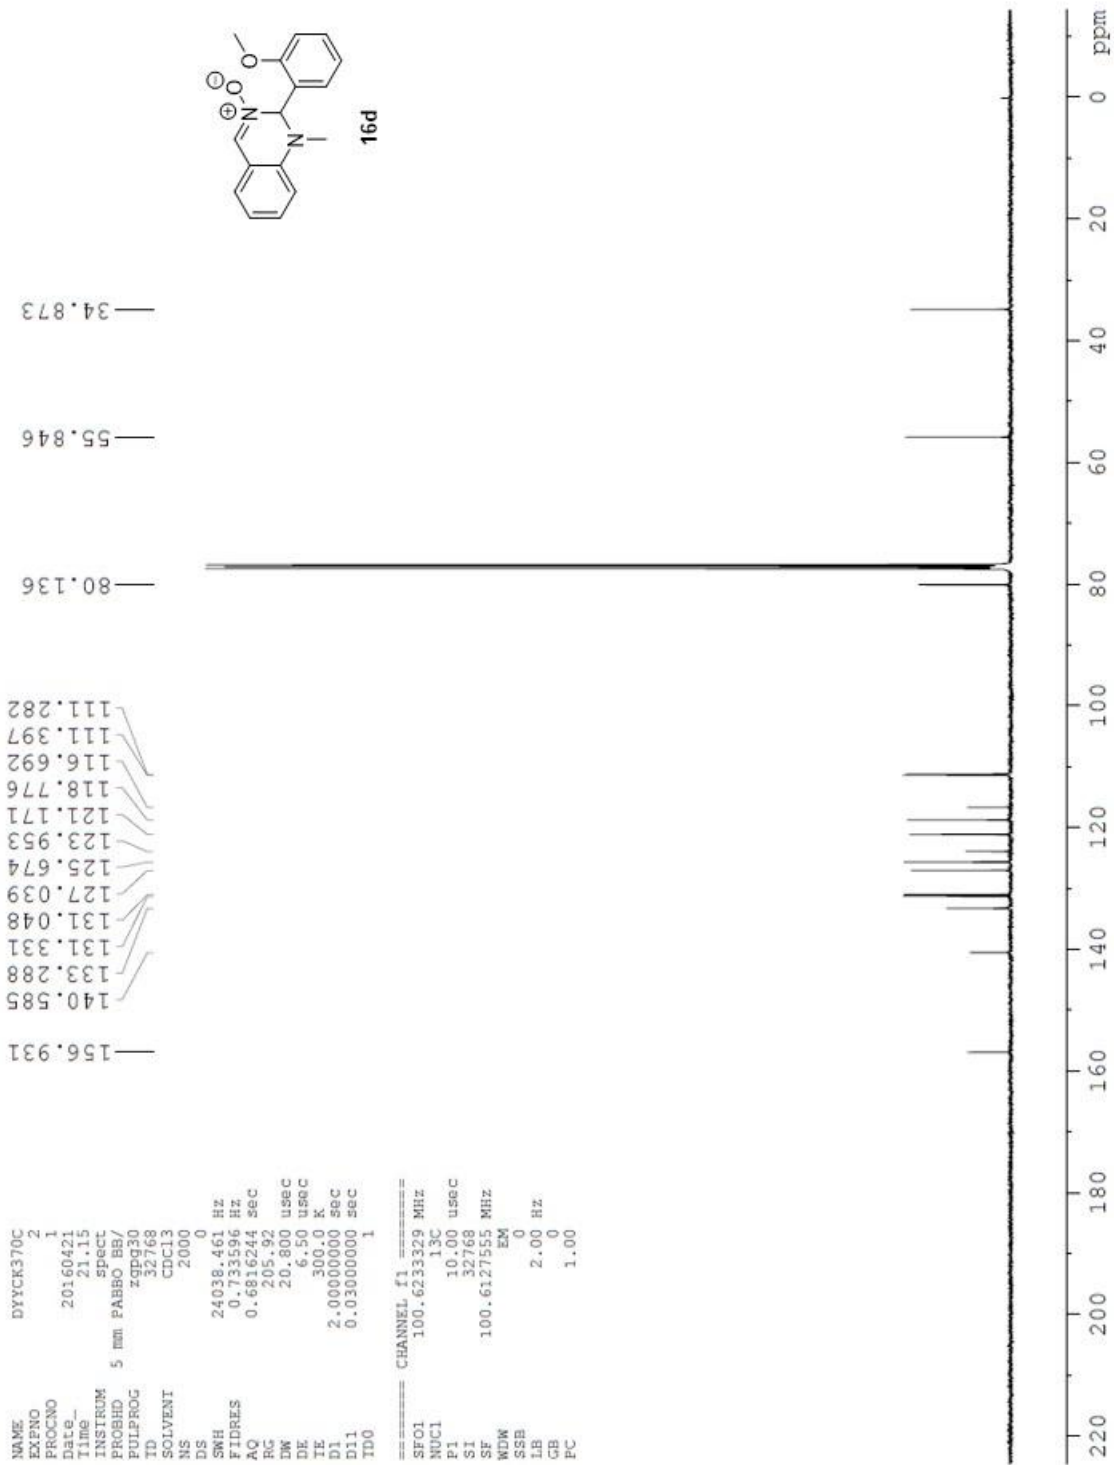

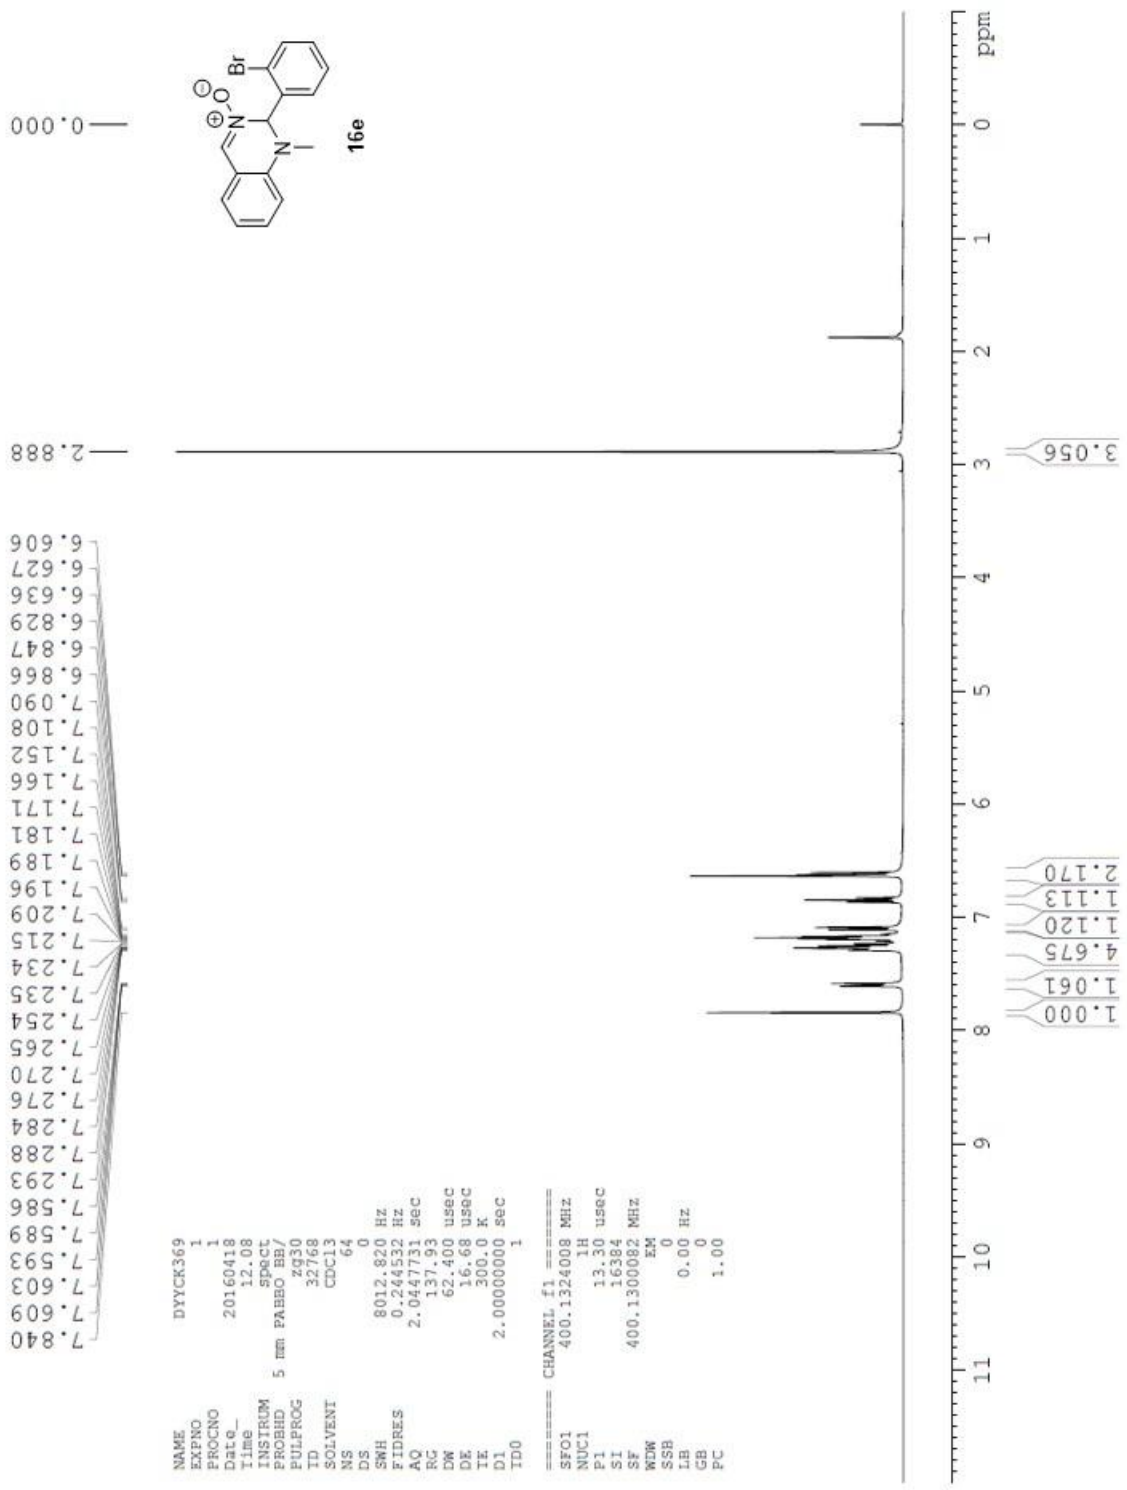

NAME DYCK369C  
 EXPNO 1  
 PROCNO 1  
 Date 20160418  
 Time 21.50  
 INSTRUM EPRCT  
 PROBHD 5 mm PABBO BB  
 PULPROG zgpg30  
 TD 32768  
 SOLVENT CDCl3  
 NS 3000  
 DS 0  
 SWH 24038.461 Hz  
 FIDRES 0.733596 Hz  
 AQ 0.6816244 sec  
 RG 205.92  
 DW 20.800 usec  
 DE 6.50 usec  
 TE 300.0 K  
 D1 2.00000000 sec  
 D11 0.03000000 sec  
 TD0 1

CHANNEL f1  
 SF01 100.6233329 MHz  
 NUC1 13C  
 P1 10.00 usec  
 S1 32768  
 SF 100.6127591 MHz  
 EM  
 SSB 0  
 LB 2.00 Hz  
 GB 0  
 FC 1.00

139.974  
 135.590  
 133.492  
 132.799  
 131.561  
 131.274  
 128.532  
 127.189  
 125.856  
 123.335  
 119.366  
 116.187  
 111.682

84.149  
 35.044

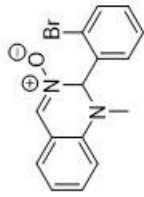

16e

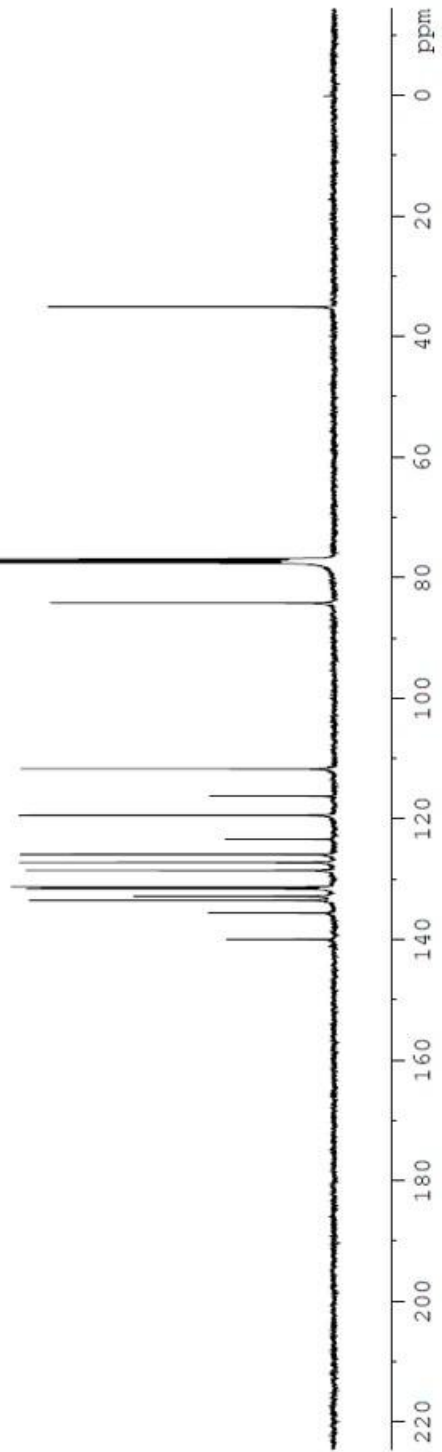

```

NAME      DYYCK372
EXPNO     1
PROCNO    1
Date_     20160419
Time      11.10
INSTRUM   spect
PROBHD    5 mm PABBO BB/
PULPROG   zg30
ID        32168
SOLVENT   CDCl3
NS        64
DS        0
SWH       8012.820 Hz
FIDRES    0.244532 Hz
AQ        2.0447731 sec
RG        115.33
DW        62.400 usec
DE        16.68 usec
TE        300.0 K
TK        300.0 K
D1        2.00000000 sec
TD0       1

===== CHANNEL f1 =====
SF01      400.1324008 MHz
NUC1      1H
F1        13.30 usec
SI        16384
SF        400.1300090 MHz
WDW       EM
SSB       0
LB        0.00 Hz
GB        0
PC        1.00

```

7.674  
7.291  
7.271  
7.262  
7.255  
7.251  
7.149  
7.128  
7.055  
7.052  
7.036  
7.033  
6.841  
6.839  
6.822  
6.821  
6.802  
6.710  
6.690  
5.928

2.957  
2.882  
2.865  
2.848  
2.831  
2.813

1.194  
1.176

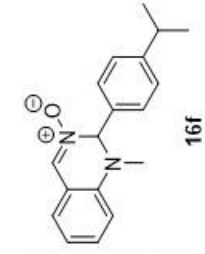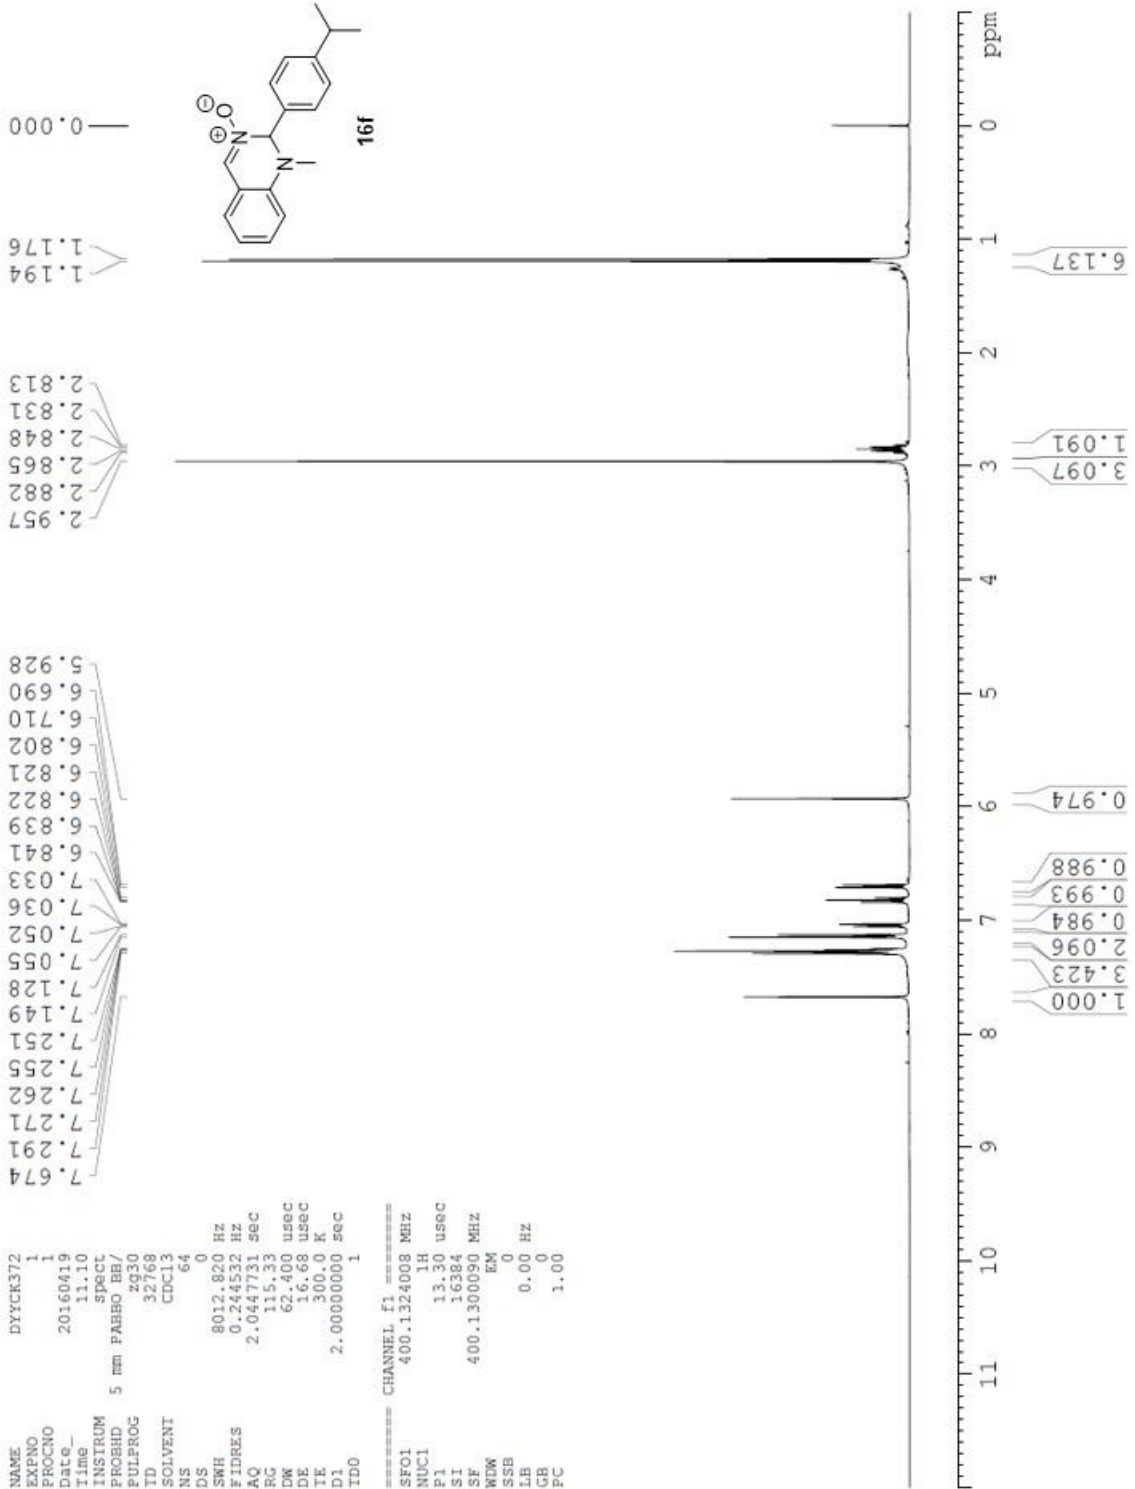



```

NAME          DYUCK372C
EXPNO         7
PROCNO        1
Date_         20160419
Time         13.05
INSTRUM       spect
PROBHD        5 mm PABBO BB/
PULPROG       zgpg30
TD            32768
SOLVENTI      CDCl3
NS            2500
DS            0
SWH           24038.461 HZ
FIDRES        0.733596 HZ
AQ            0.681624 SEC
RG            205.92
DE            20.800 usec
TE            300.0 K
D1            2.00000000 sec
D11           0.03000000 sec
TD0           1
===== CHANNEL f1 =====
SFO1          100.6233329 MHz
NUC1          13C
P1            10.00 usec
SI            32768
SF            100.6127575 MHz
WDW           EM
SSB           0
LB            2.00 HZ
GB            0
PC            1.00

```

```

150.692
140.850
132.695
131.644
131.408
126.994
126.680
126.070
119.134
116.375
111.243

```

```

35.729
33.988
23.924

```

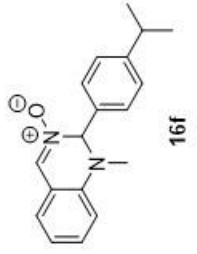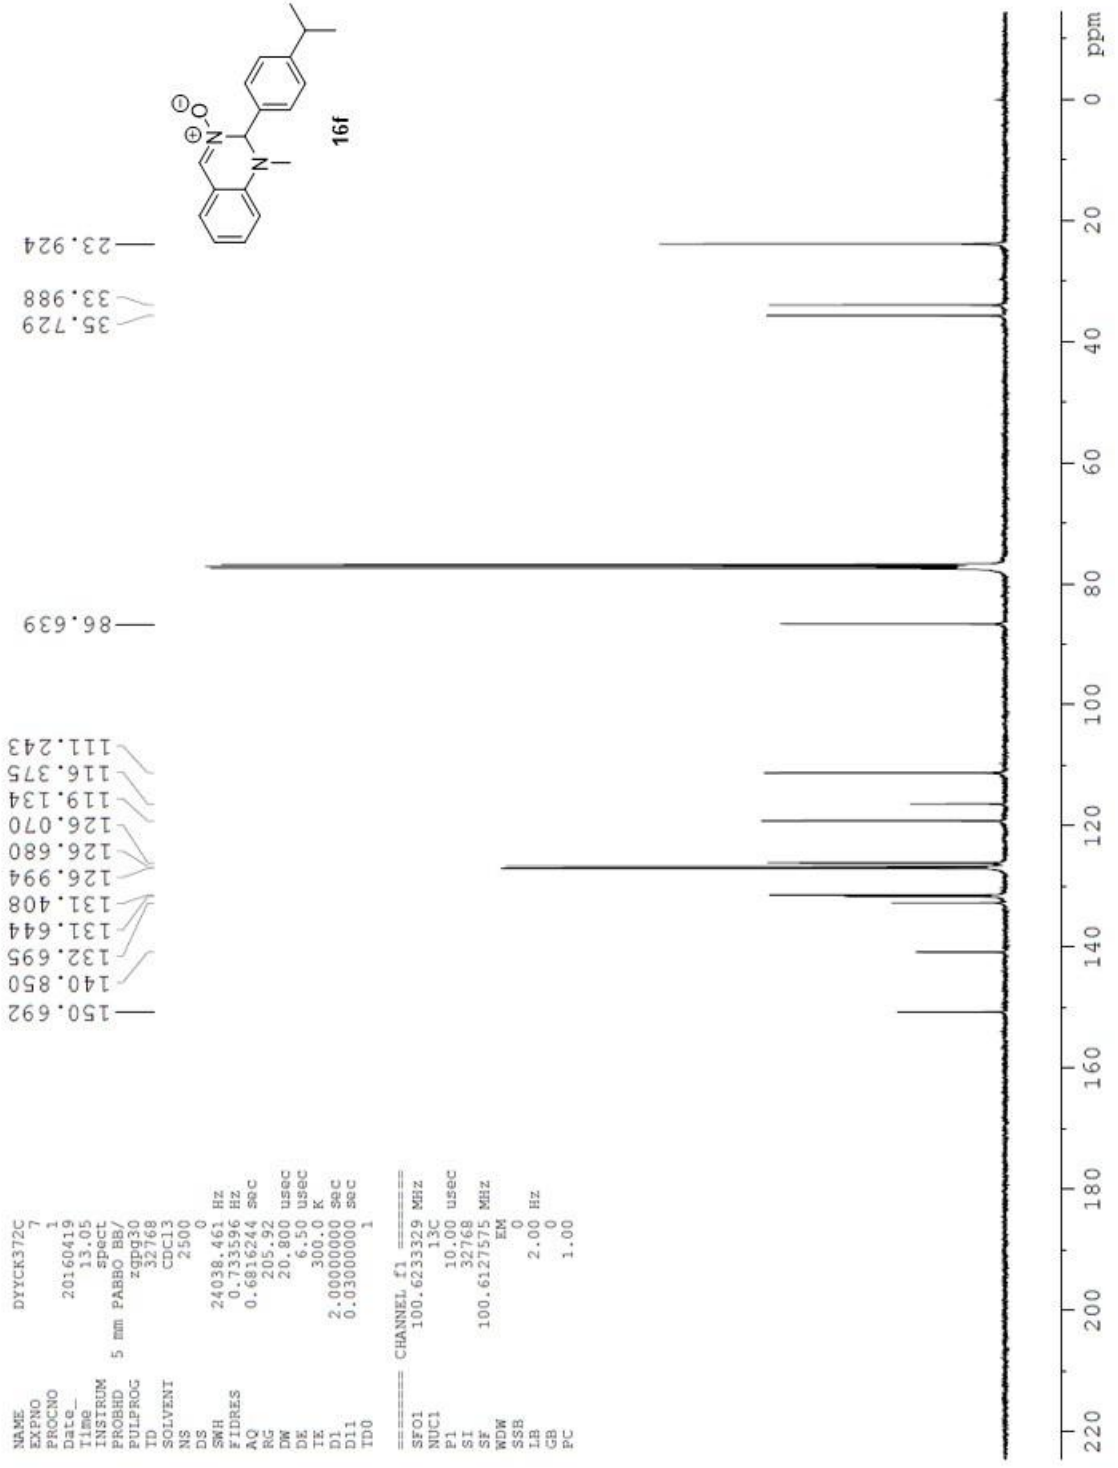

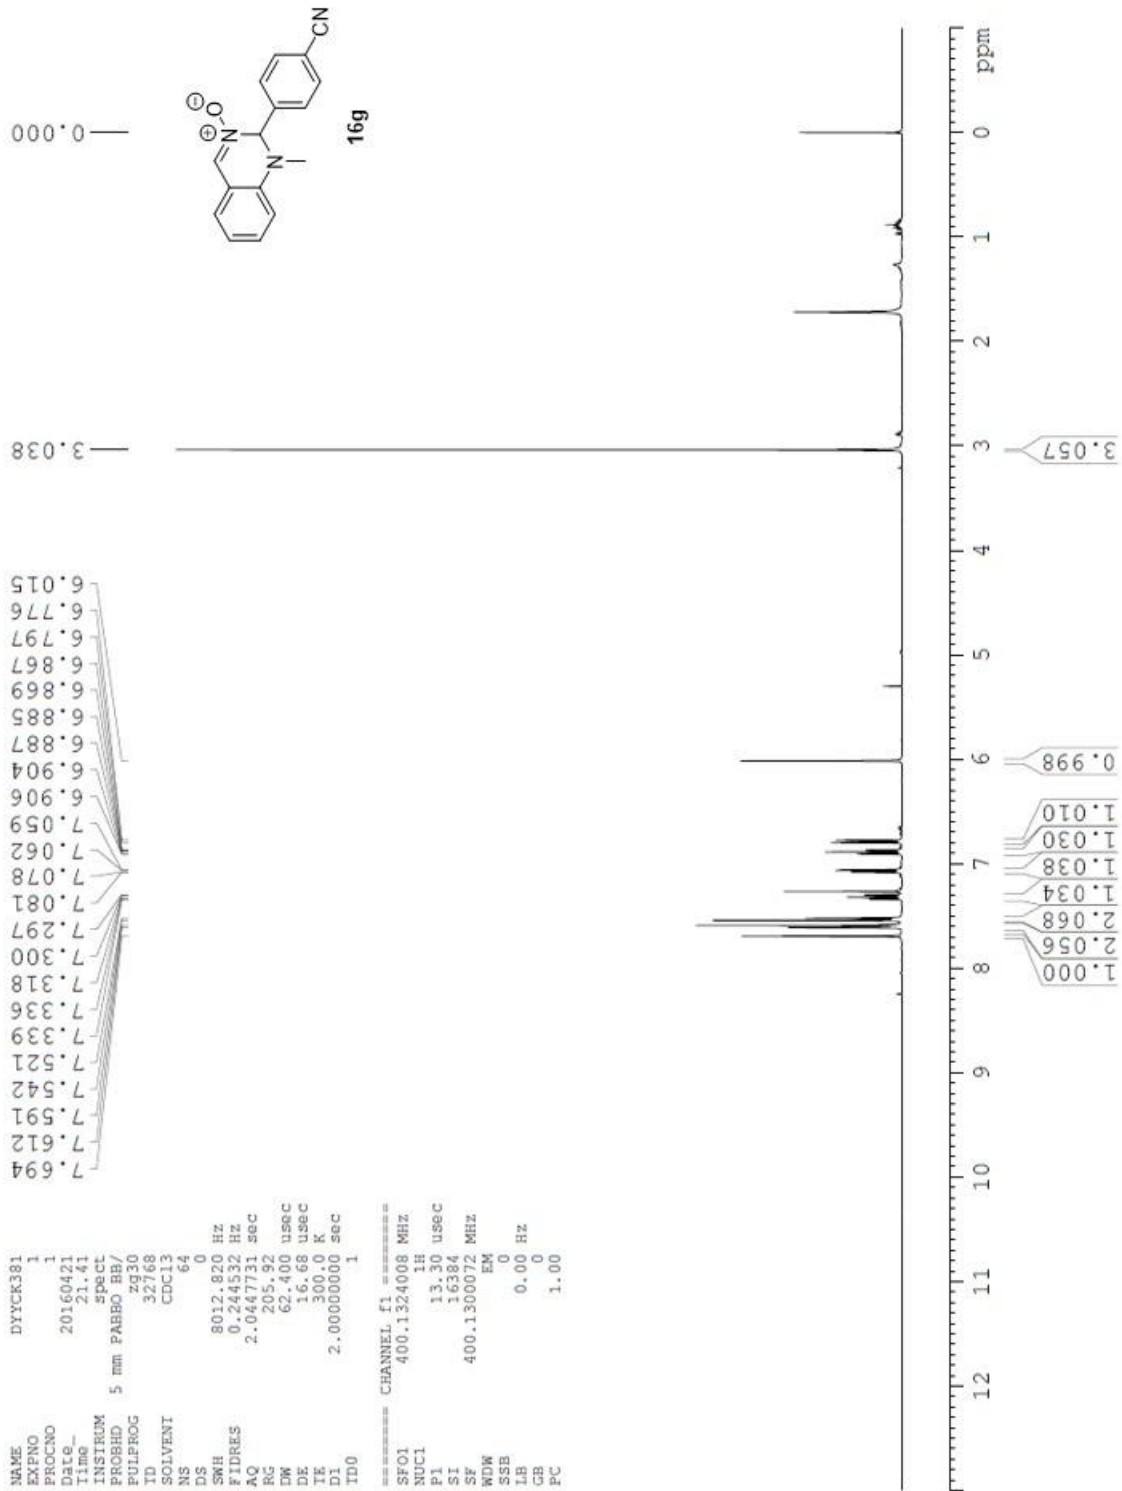

```

NAME          DYYCK381C
EXPNO         2
PROCNO        1
Date_         20160421
Time         23.14
INSTRUM       spect
PROBHD        5 mm PABBO BB/
PULPROG       zgpg30
TD            32768
SOLVENT       CDCl3
NS            2000
DS            0
SWH           24038.461 Hz
FIDRES        0.733596 Hz
AQ            0.6816244 sec
RG            205.92
DW            20.800 usec
DE            6.50 usec
TE            300.0 K
D1            2.00000000 sec
D11           0.03000000 sec
TD0           1

===== CHANNEL f1 =====
SFO1          100.6233329 MHz
NUC1          13C
P1            10.00 usec
SI            32768
SF            100.6127558 MHz
WDW           EM
SSB           0
LB            2.00 Hz
GB            0
PC            1.00

```

```

140.152
132.732
131.842
131.793
127.556
126.351
120.225
118.270
116.461
113.761
112.233

```

86.013

36.728

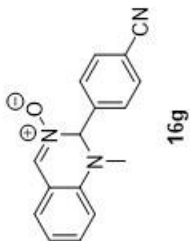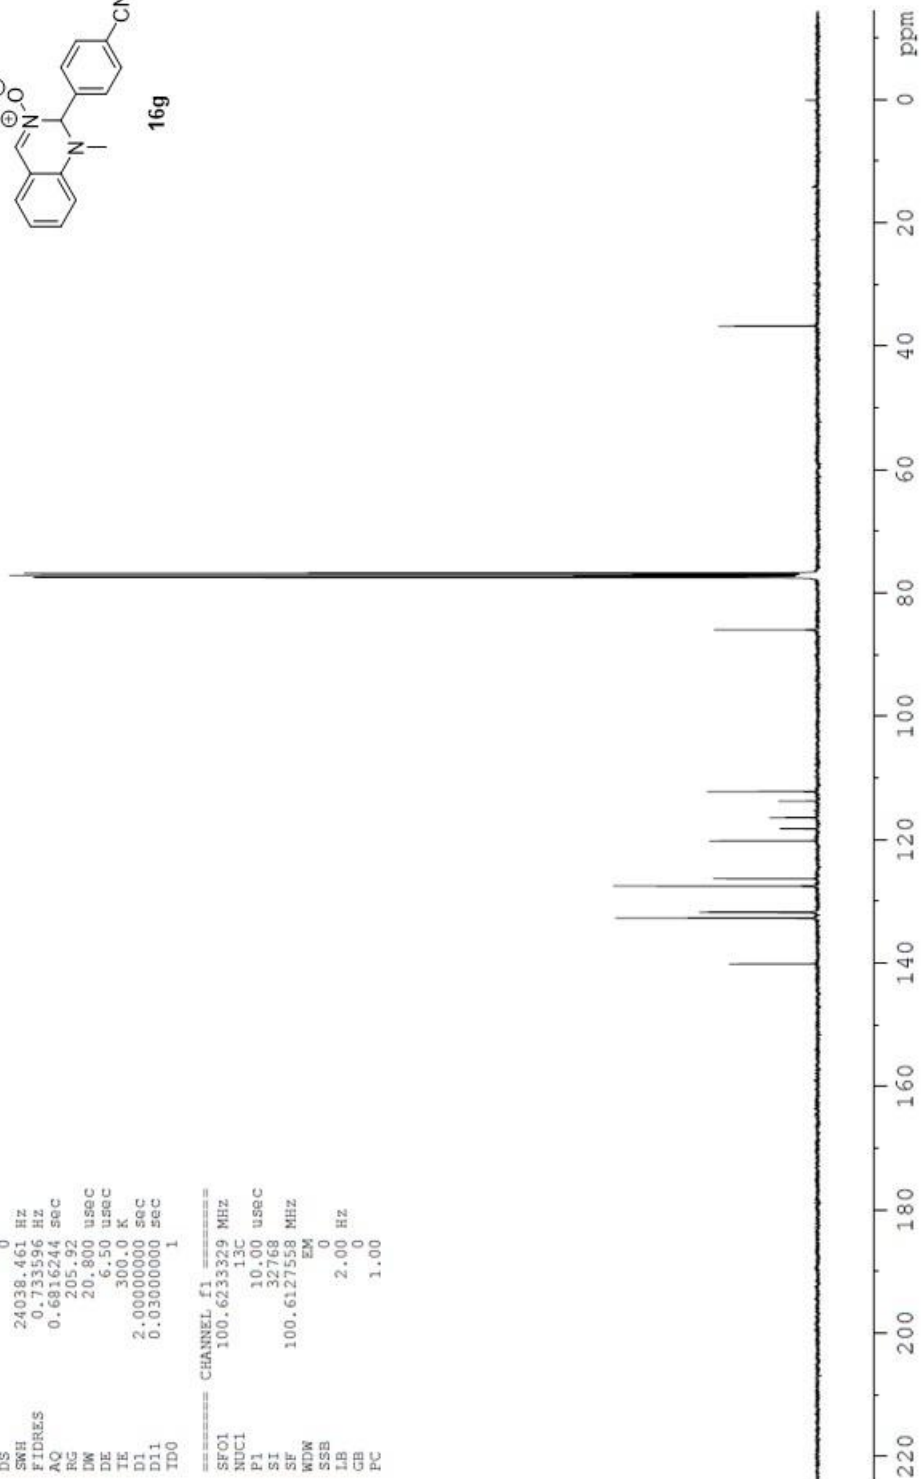

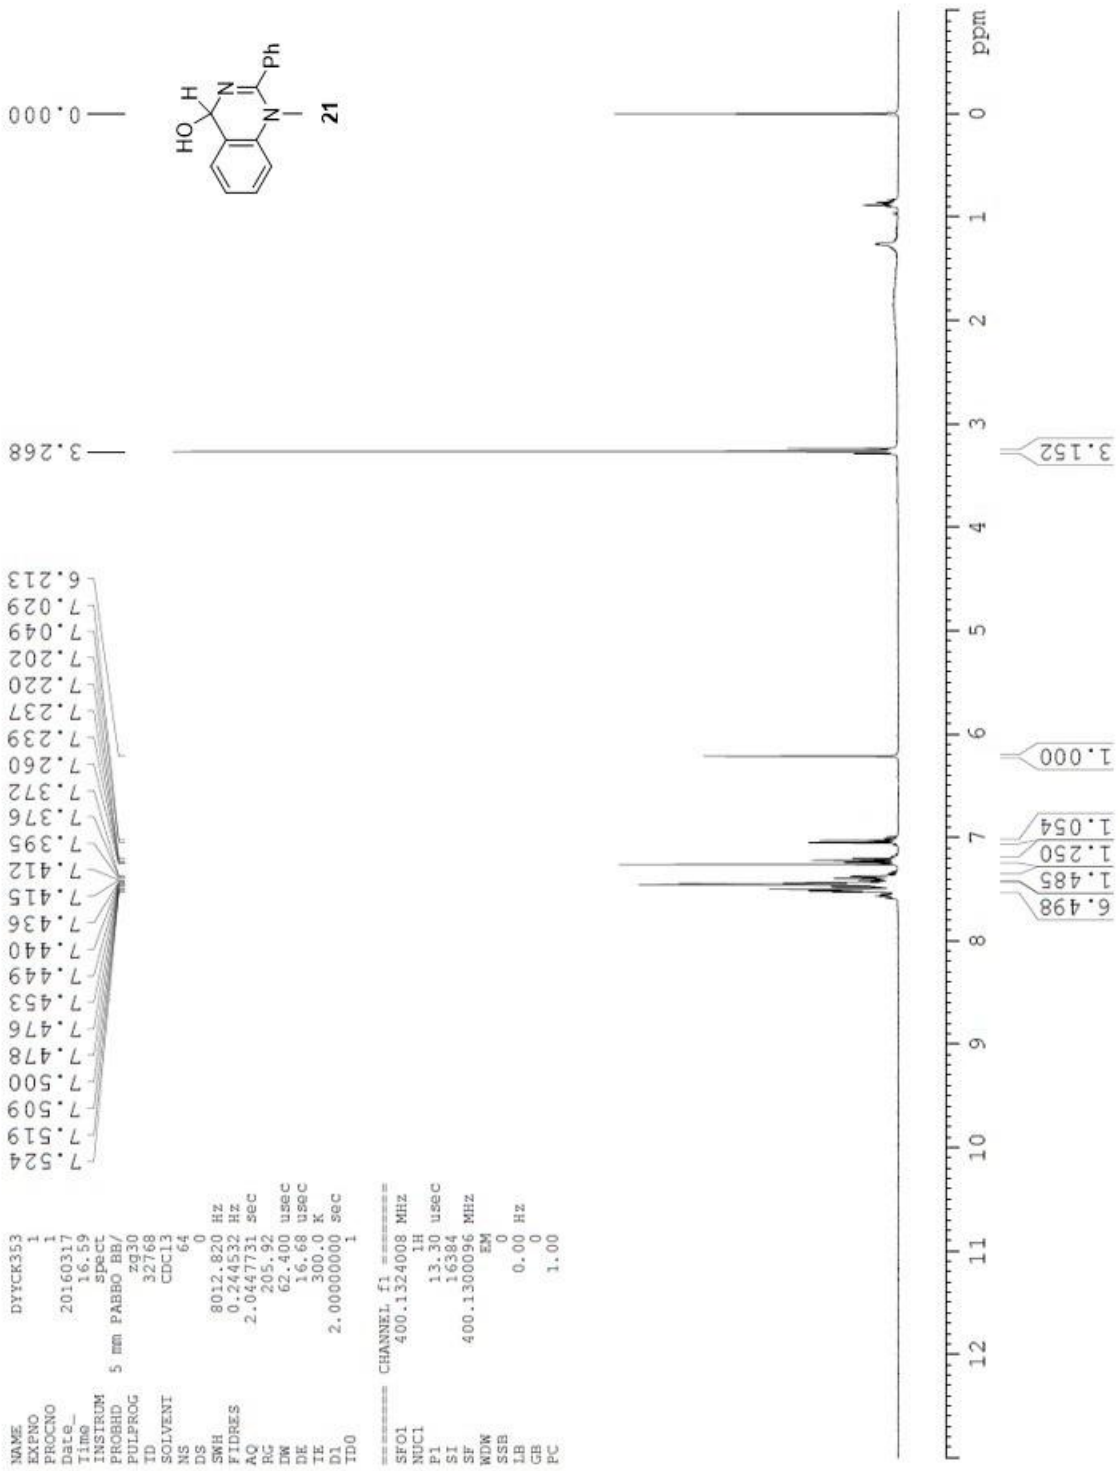

```

NAME      DYCK353C
EXPNO     1
PROCNO    1
Date_     20160430
Time      7.27
INSTRUM   spect
PROBHD    5 mm PABBO BB/
PULPROG   zgpg30
ID        32768
SOLVENT   DMSO
NS        10000
DS        0
SWH       24038.461 Hz
FIDRES    0.733596 Hz
AQ        0.6816244 sec
RG        205.92
DW        20.800 usec
DE        6.50 usec
TE        300.2 K
D1        2.00000000 sec
D11       0.03000000 sec
TD0       1
=====
CHANNEL f1 =====
SFO1      100.6233329 MHz
NUC1      13C
P1        10.00 usec
SI        32768
SF        100.6128179 MHz
NDDW      EM
SSB       0
LB        2.00 Hz
GB        0
PC        1.00

```

```

153.621
138.445
136.046
129.302
128.647
128.094
126.442
123.458
122.865
112.359

```

```

76.598
54.883
35.705

```

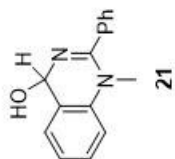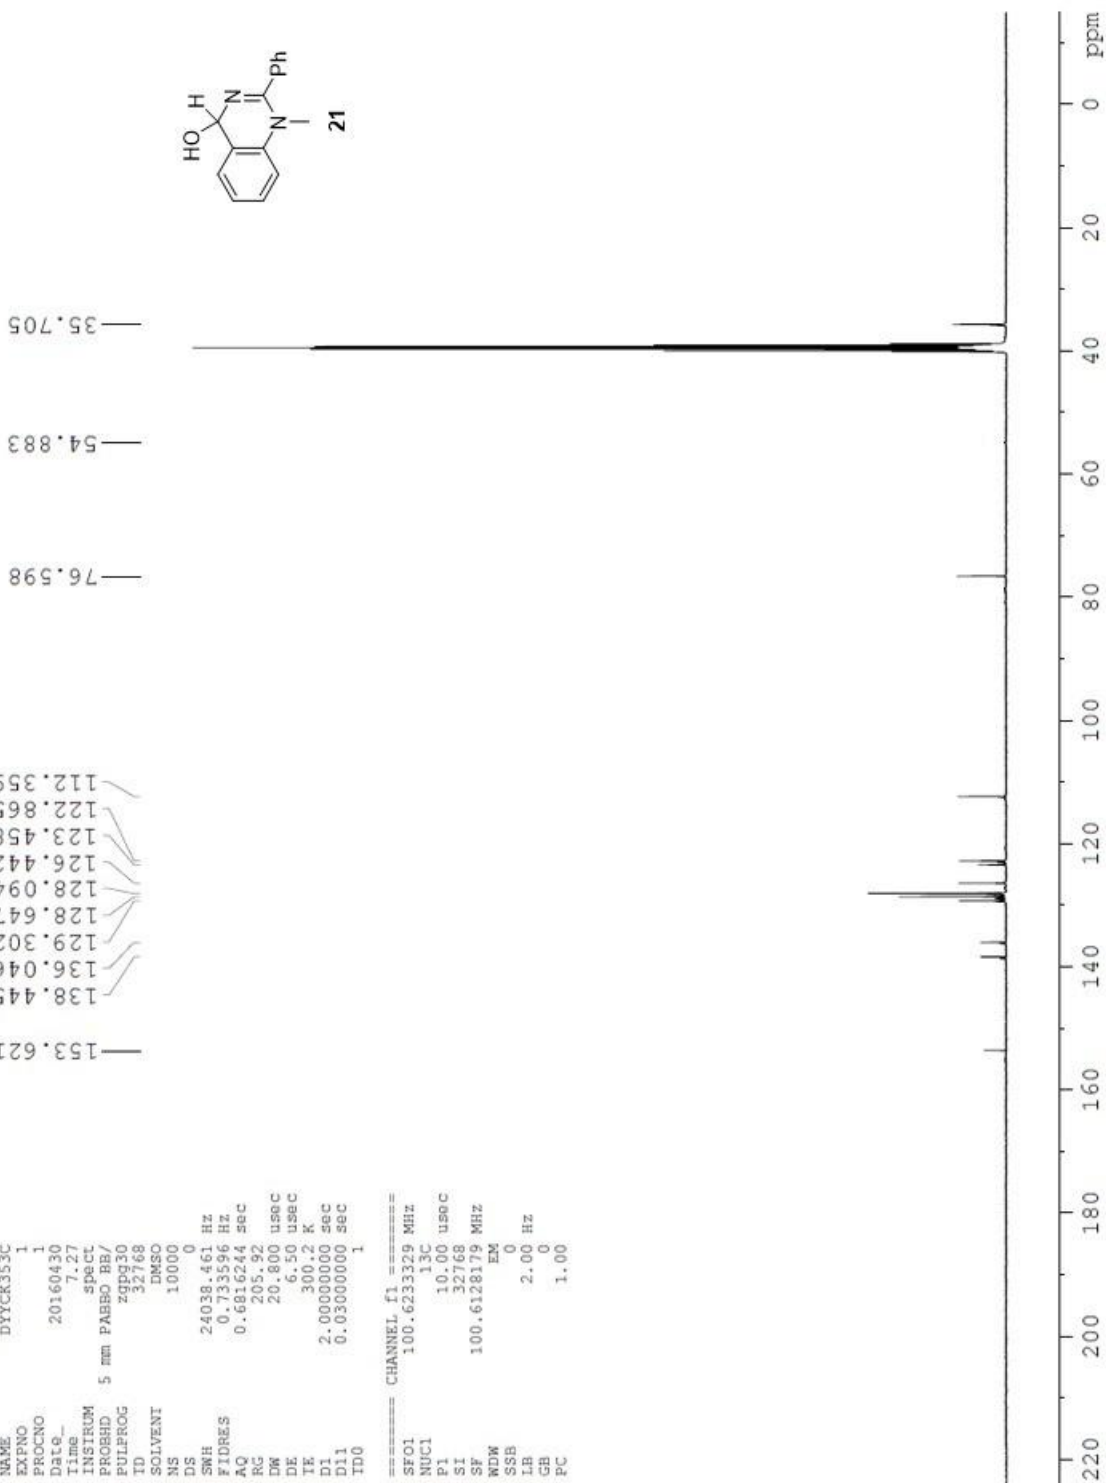

Supplement: c6ra13972h1.pdf [file c6ra13972h1.pdf]
